# Supplementary material for: A Phase Ib Dose-Escalation and Expansion Study of the BCL2 Inhibitor Venetoclax Combined with Tamoxifen in ER and BCL2–Positive Metastatic Breast Cancer
Source: Oxford University Press journal article supplement (doi:10.1158/2159-8290.cd-18-1151), 2019-02-07
Supplement: 21598290cd181151-sup-209709_2_supp_5131346_phnrsm.xlsx [file 21598290cd181151-sup-209709_2_supp_5131346_phnrsm.xlsx]

## Sheet: Sheet1
Gene	Primer Pair	Forward Primer	Reverse Primer	Amplicon Sequence	Chromosome Location	Amplicon Length (bp)	Amplicon GC%
ARID1A	ARID1A-1	ACACTGACGACATGGTTCTACAGGGAGCTGCCATTGTCTGGCT	TACGGTAGCAGAGACTTGGTCTCCTGGAGTTCGAAGGGACCAGGG	GGGAGCTGCCATTGTCTGGCTcttctctcttaaaatggctgcctgtctgc cttcctctccttccctccttcagcctttgtgttgggtttttccagaggtg tctgctcctctttttcctctcCCCTGGTCCCTTCGAACTCCAGG	chr1:26,697,655-26,697,798	144	0.541667
	ARID1A-2N	ACACTGACGACATGGTTCTACACACCACAGCTCCAGTCCTCT	TACGGTAGCAGAGACTTGGTCTAGCCTGTGGCTGTGAGTAGG	CACCACAGCTCCAGTCCTCTcagcctccatactcccagcagccatcccag cctccacatcagcagtccccggctccatacccctcccagcagtcgacgac acagcagcacccccagagccagccccCCTACTCACAGCCACAGGCT	chr1:26731324-26731469	146	0.650685
	ARID1A-3	ACACTGACGACATGGTTCTACAGCCTCTTCATGAGCCATTTCTAGCTCT	TACGGTAGCAGAGACTTGGTCTTGCATGATGCTGTCCGACTGGC	GCCTCTTCATGAGCCATTTCTAGCTCTgaattaacttcctagttagaatt cccaggcttagccatgatatgcttatgttgttctttgtctggagcaggca accagatgccacctcggccacccagtgGCCAGTCGGACAGCATCATGCA	chr1:26,761,287-26,761,435	149	0.496644
	ARID1A-4	ACACTGACGACATGGTTCTACAGGGCATGATGGGAACTGGACCTC	TACGGTAGCAGAGACTTGGTCTTTACCTGCAGAATTGTTGGCCATGGTT	GGGCATGATGGGAACTGGACCTCcttatggacaagggattaatagtatgg ctggcatgatcaaccctcagggacccccatattccatgggtggAACCATG GCCAACAATTCTGCAGGTAA	chr1:26,766,251-26,766,370	120	0.508333
	ARID1A-5	ACACTGACGACATGGTTCTACATGGGTGGACCGTTATCTGGCCT	TACGGTAGCAGAGACTTGGTCTGTGTCAGGCGCCCACTCACC	TGGGTGGACCGTTATCTGGCCTtcactgaggagaaggccatgggcatgac aaatctgcctgctgtgggtaggaaacctctggacctctatcgcctctatg tgtctgtgaaggagattggtggattgactcaGGTGAGTGGGCGCCTGACA C	chr1:26767868+26768018	151	0.549669
	ARID1A-6	ACACTGACGACATGGTTCTACAGCCGGCCCTGGGCTAGGAAA	TACGGTAGCAGAGACTTGGTCTGCCCACTATAGCTTCAGGGTGCTG	GCCGGCCCTGGGCTAGGAAAtgtggcgatgggaccacgacagcactatcc ctatggaggtccttatgacagagtgaggtaagcatgaccccagctcctgt ccactccccCAGCACCCTGAAGCTATAGTGGGC	chr1:26773420+26773552	133	0.593985
	ARID1A-7	ACACTGACGACATGGTTCTACAGCCTGCTGCACTGGCGGATT	TACGGTAGCAGAGACTTGGTCTTGTCCCTGGTGTACCCTCTGCTG	GCCTGCTGCACTGGCGGATTggtgggggggacaccactgagcatatccag acccacttcgagagcaagacagagctgctgccttcccggcctcacgcacc ctgcccaccagcccctcggaagcatgtgacaaCAGCAGAGGGTACACCAG GGACA	chr1:26,779,417-26,779,571	155	0.632258
	ARID1A-8	ACACTGACGACATGGTTCTACAGCACCCTGCCCACCAGCC	TACGGTAGCAGAGACTTGGTCTGCTCCATCCTCGGTCAAGGTGC	GCACCCTGCCCACCAGCCcctcggaagcatgtgacaacagcagagggtac accagggacaacagaccaggaggggcccccacctgatggacctccagaaa aacggatcacagccactatggatgacatgttgtctactcggtctaGCACC TTGACCGAGGATGGAGC	chr1:26,779,512-26,779,678	167	0.586826
	ARID1A-9	ACACTGACGACATGGTTCTACACCCGAGAGCATTTGCCTGCCT	TACGGTAGCAGAGACTTGGTCTGTTTCCAAGACCAGTCTCTGCGGG	CCCGAGAGCATTTGCCTGCCTgtcctggacggactcctacactgggcagt ttgcccttcagctgaagcccaggaccccttttccaccctgggccccaatg ccgtcctttcCCCGCAGAGACTGGTCTTGGAAAC	chr1:26780127+26780260	134	0.61194
	ARID1A-10	ACACTGACGACATGGTTCTACAAGCAGCAGCAGCAGCAGCAA	TACGGTAGCAGAGACTTGGTCTCTGGGGAAGGGGCTGCCAGA	AGCAGCAGCAGCAGCAGCAAcggtgagtaaagcctggtctcggtgctgct atggatcaggcttcgccactgcccaccctaatcctgtgtttctttgcctc ctatagacatgattcctatggcaatcagttctccacccaaggcacccctT CTGGCAGCCCCTTCCCCAG	chr1:26773696-26773864	169	0.56213
	ARID1A-11	ACACTGACGACATGGTTCTACATACAAGCGGCCAATGGAT	TACGGTAGCAGAGACTTGGTCTGGCATTGCCATACTGGTTGT	TACAAGCGGCCAATGGATggcacatatggccctcctgccaagcggcacga aggggagatgtacagcgtgccatacagcactgggcaggggcagcctcagc agcagcagttgcccccagcccagccccagcctgccagccagcaacaagct gcccagccttcccctcagcaagatgtatACAACCAGTATGGCAATGCC	chr1:26774332-26774529	198	0.616162
	ARID1A-12N	ACACTGACGACATGGTTCTACACGCACCTCTCCTAGCAAGTC	TACGGTAGCAGAGACTTGGTCTCTGTGTGGCTTCAACAGAGC	CGCACCTCTCCTAGCAAGTCtccattcctgcactctgggatgaaaatgca gaaggcaggtcccccagtacctgcctcgcacatagcacctgcccctgtgc agccccccatgattcggcgggatatcaccttcccacctgGCTCTGTTGAA GCCACACAG	chr1:26775019-26775177	159	0.591195
	ARID1A-13	ACACTGACGACATGGTTCTACACGCCAACATCTCGGGGCAGT	TACGGTAGCAGAGACTTGGTCTCTCTGCGGGGAAAGGACGGC	CGCCAACATCTCGGGGCAGTtggacctatctccataccccgagagcattt gcctgcctgtcctggacggactcctacactgggcagtttgcccttcagct gaagcccaggaccccttttccaccctgggccccaatGCCGTCCTTTCCCC GCAGAG	chr1:26780090-26780245	156	0.615385
	ARID1A-14N	ACACTGACGACATGGTTCTACATCAGGGATTTCCAGCAGCCAAGGA	TACGGTAGCAGAGACTTGGTCTGGCACTGCAGCAGGCGAGAG	TCAGGGATTTCCAGCAGCCAAGGAgagcagagtaatccagctcagtctcc tttctctcctcatacctcccctcacctgcctggcatccgaggcccttccc cgtcccctgttggctctcccgccagtgttgctcagtctcgctcaggacca CTCTCGCCTGCTGCAGTGCC	chr1:26760925-26761094	170	0.611765
RUNX1	RUNX1-1	ACACTGACGACATGGTTCTACATCTGCCAACTCCTTCATGCACCTCT	TACGGTAGCAGAGACTTGGTCTGCCAGCGGCATGACAACCCT	TCTGCCAACTCCTTCATGCACCTCTagtctcctggaccttccaccccagc tcagctgcaaagaatgtgttttcaagtggcttacttgagagtcgactgga aagttctgcagagAGGGTTGTCATGCCGCTGGC	chr21:34799217+34799349	133	0.526316
	RUNX1-2	ACACTGACGACATGGTTCTACACGCTGGCACGTCCAGGTGAA	TACGGTAGCAGAGACTTGGTCTCAGATACAAGGCAGATCCAACCATCCC	CGCTGGCACGTCCAGGTGAAatgggcgttgctgggtgcacagaaggagag gcaatggatcccaggtattggtaggactgatcgtaggaccacggtgGGGA TGGTTGGATCTGCCTTGTATCTG	chr21:34,799,343-34,799,465	123	0.569106
	RUNX1-3	ACACTGACGACATGGTTCTACATGGCCCAGGTGCAGGAGAGG	TACGGTAGCAGAGACTTGGTCTGCGCACAGCCATGAGGGTCA	TGGCCCAGGTGCAGGAGAGGcgggcagtgggctccatctggtacttaccc tgcatctgactctgaggctgagggttaaaggcagtggagtggttcaggga ggcacgagggttgggcgtgggggctgggtggtgtgggcTGACCCTCATGG CTGTGCGC	chr21:34,834,362-34,834,519	158	0.64557
	RUNX1-4	ACACTGACGACATGGTTCTACATGTGGGTTTGTTGCCATGAAACGTG	TACGGTAGCAGAGACTTGGTCTTGGTCACTGTGATGGCTGGCAATG	TGTGGGTTTGTTGCCATGAAACGTGtttcaagcatagttttgacagataa cgtacctcttccacttcgaccgacaaacctgaggtcattaaatcttgcaa cctggttcttcatggctgcggtagcatttctcagctcagccgagtagttt tcatCATTGCCAGCCATCACAGTGACCA	chr21:34880502+34880679	178	0.460674
	RUNX1-5	ACACTGACGACATGGTTCTACACCTGGTTCTTCATGGCTGCGGT	TACGGTAGCAGAGACTTGGTCTACTGGTGTTTAGGTGGTGGCCCT	CCTGGTTCTTCATGGCTGCGGTagcatttctcagctcagccgagtagttt tcatcattgccagccatcacagtgaccagagtgccatctggaacatcccc tAGGGCCACCACCTAAACACCAGT	chr21:34880602+34880725	124	0.532258
	RUNX1-6	ACACTGACGACATGGTTCTACACGCTGCCCTCGCGGATCTC	TACGGTAGCAGAGACTTGGTCTTCCTCTGCTCCGTGCTGCCT	CGCTGCCCTCGCGGATCTCccccggcctcgccggcctccgcctgtcctcc caccaccctctccgggccagtaccttgaaagcgatgggcagggtcttgtt gcagcgccagtgcgtAGGCAGCACGGAGCAGAGGA	chr21:34886770+34886904	135	0.696296
	RUNX1-7	ACACTGACGACATGGTTCTACACCCAAGGAATCTGAGACATGGTCCCT	TACGGTAGCAGAGACTTGGTCTAAACCCACCGCAAGTCGCCA	CCCAAGGAATCTGAGACATGGTCCCTgagtataccagcctggagggtgta ccagcctggagggtgtaccagccccaagtggatgcacttacttcgaggtt ctcggggcccatccactgtgattttgatggctctgtggtaggTGGCGACT TGCGGTGGGTTT	chr21:34859383-34859544	162	0.567901
RB1	RB1-1	ACACTGACGACATGGTTCTACATGGTAGGCTTGAGTTTGAAGAA	TACGGTAGCAGAGACTTGGTCTCCAATACTCCATCCACAGATGA	TGGTAGGCTTGAGTTTGAAGAAacagaagaacctgattttactgcattat gtcagaaattaaagataccagatcatgtcagagagagagcttggttaact tgggagaaagttTCATCTGTGGATGGAGTATTGG	chr13:48307274-48307407	134	0.38806
	RB1-2	ACACTGACGACATGGTTCTACAACCCTGCGATTTTCTCTCAT	TACGGTAGCAGAGACTTGGTCTTGGTTCTTTGAGCAACATGG	ACCCTGCGATTTTCTCTCATacaaagatctgaatctctaactttctttaa aaatgtacatttttttttcaggggaagtattacaaatggaagatgatctg gtgatttcatttcagttaatgctatgtgtccttgactattttattaaact ctcacctcCCATGTTGCTCAAAGAACCA	chr13:48359946-48360123	178	0.337079
	RB1-3	ACACTGACGACATGGTTCTACAGAAACACAGAGAACACCACGAA	TACGGTAGCAGAGACTTGGTCTGAAACGTGAACAAATCTGAAACA	GAAACACAGAGAACACCACGAAaaagtaaccttgatgaagaggtgaatgt aattcctccacacactccagttaggtatgaattttcctacttttaattat attataattttgttattcatggctttatagTGTTTCAGATTTGTTCACGT TTC	chr13:48368531-48368683	153	0.326797
	RB1-4	ACACTGACGACATGGTTCTACATGATTCTGGAACAGATTTGTCTTT	TACGGTAGCAGAGACTTGGTCTGGGATTCCATGATTCGATGT	TGATTCTGGAACAGATTTGTCTTTcccatggattctgaatgtgcttaatt taaaagcctttgatttttacaaagtgatcgaaagttttatcaaagcagaa ggcaacttgacaagagaaatgataaaacatttagaacgatgtgaACATCG AATCATGGAATCCC	chr13:48381266-48381429	164	0.341463
	RB1-5	ACACTGACGACATGGTTCTACACTGGGTGTACAACCTTGAAGTG	TACGGTAGCAGAGACTTGGTCTTTGCTTGTGTCTCTGCATTTG	CTGGGTGTACAACCTTGAAGTGtatgtataatctgtgattcttagccaac ttgaaatgaagacttttcctttaaatatatctaggtatctttctcctgta agatctccaaagaaaaaaggttcaactacgcgtgtaaattctactgCAAA TGCAGAGACACAAGCAA	chr13:48456120-48456286	167	0.359281
	RB1-6	ACACTGACGACATGGTTCTACATTTTCTTATTCCCACAGTGTATCG	TACGGTAGCAGAGACTTGGTCTACTTGGTCCAAATGCCTGTC	TTTTCTTATTCCCACAGTGTATCGgctagcctatctccggctaaatacac tttgtgaacgccttctgtctgagcacccagaattagaacatatcatctgg acccttttccagcacaccctgcagaatgagtatgaactcatgagaGACAG GCATTTGGACCAAGT	chr13:48459671-48459835	165	0.454545
	RB1-7	ACACTGACGACATGGTTCTACAACGCCTTCTGTCTGAGCACCC	TACGGTAGCAGAGACTTGGTCTAGGGAGGAGAGAAGGTGAAGTGCT	ACGCCTTCTGTCTGAGCACCCagaattagaacatatcatctggacccttt tccagcacaccctgcagaatgagtatgaactcatgagagacaggcatttg gaccaagtaagaaaatcaAGCACTTCACCTTCTCTCCTCCCT	chr13:48459728-48459869	142	0.464789
	RB1-8	ACACTGACGACATGGTTCTACATTCACCCTTACGGATTCCTG	TACGGTAGCAGAGACTTGGTCTTCCCTAAAGAGAAAACACACACC	TTCACCCTTACGGATTCCTGgagggaacatctatatttcacccctgaaga gtccatataaaatttcagaaggtctgccaacaccaacaaaaatgactcca agatcaaGGTGTGTGTTTTCTCTTTAGGGA	chr13:48465261-48465390	130	0.415385
	RB1-9	ACACTGACGACATGGTTCTACAAAGTTCCAGAAAATAAATCAGATGG	TACGGTAGCAGAGACTTGGTCTATGACCATCTCGGCTACTGG	AAGTTCCAGAAAATAAATCAGATGGtatgtaacagcgaccgtgtgctcaa aagaagtgctgaaggaagcaaccctcctaaaccactgaaaaaactacgct ttgatattgaaggatcagatgaagcagatggaaggtaggaaccagttttg aatgttttCCAGTAGCCGAGATGGTCAT	chr13:48476710-48476887	178	0.41573
	RB1-10N	ACACTGACGACATGGTTCTACATCCCTTCATTGCTTAACACATTT	TACGGTAGCAGAGACTTGGTCTTGGCTTACGTTAAAATAGGAAATCA	TTGTGTTCTTATAGCAGCAGCAGcaacagcaacagcagcagcagcagcag cagcaacagcaacagcagcagcagcaacagcaacaacagcaacaccagca gcaacagcagcaacaggcggctcctccccaaccccagccccAGTCCCAGC CCCAGGTAG	chr13:48373325-48373500	159	0.591195
MED12	MED12-1	ACACTGACGACATGGTTCTACATCCTGCCCTACTCTCCCACCC	TACGGTAGCAGAGACTTGGTCTGGCACTGCCATGCTCATCCC	TCCTGCCCTACTCTCCCACCCcttcccccttcccctaaggaaaaaacaac taaacgccgctttcctgcctcaggatgaactgacggccttgaatgtaaaa caaggtttcaataaccagcctgctgtctctgGGGATGAGCATGGCAGTGC C	chrX:71119300-71119450	151	0.529801
	MED12-2	ACACTGACGACATGGTTCTACAGCGGGCTGCCTGGCTCATTA	TACGGTAGCAGAGACTTGGTCTAGGAGGATGGTTCCAAGGGTGTCTC	GCGGGCTGCCTGGCTCATTAagatgacctgtgcctactatgcagcaatct ctgagaccaaggttaagaagagacatgttgaccctttcatgggtgagtaa ctcctaacaccaggtgtactgctgatggcttcaaggagtgataGAGACAC CCTTGGAACCATCCTCCT	chrX:71120079+71120246	168	0.5
	MED12-3	ACACTGACGACATGGTTCTACATTCCTCCAGAATGGACTCAGA	TACGGTAGCAGAGACTTGGTCTGGCCAGCTTCTCGGTGTA	TTCCTCCAGAATGGACTCAGAtcatcaccaagtacttatgggagcagtta cagaagatggctgaatactaccggccagggcctgcaggaagtgggggctg tggttccacgatagggcccttgccccatgatgtagaggtggcaatccggc agtgggatTACACCGAGAAGCTGGCC	chrX:71120962-71121137	176	0.556818
	MED12-4	ACACTGACGACATGGTTCTACATCCCCACCCCTACCTTACTCCTCC	TACGGTAGCAGAGACTTGGTCTCACGATGCCGACCAGAACGCT	TCCCCACCCCTACCTTACTCCTCCttctcttcctttgttctccagatctc ctcagatgatgatgctgtggtgtcattgctatgtgaatgggctgtcagct gcaAGCGTTCTGGTCGGCATCGTG	chrX:71123050-71123173	124	0.524194
	MED12-5	ACACTGACGACATGGTTCTACAGCCCTGTGAGGGGAAGGGCA	TACGGTAGCAGAGACTTGGTCTTGCACGTGTCGTGGCTGGTC	GCCCTGTGAGGGGAAGGGCAgtccatcccctgagaagccagatgtcgaga aggaggtgaagcccccacccaaggagaagattgaagggacccttggggtt ctttacGACCAGCCACGACACGTGCA	chrX:71124993+71125118	126	0.595238
	MED12-6	ACACTGACGACATGGTTCTACATGGCCCTCGTGTGGACCCAT	TACGGTAGCAGAGACTTGGTCTGGCACCGCAGGTTGCTGCT	TGGCCCTCGTGTGGACCCATaccgtcctgtgcgcttaccaatgcagaagc tgcccacccgaccaacttaccctggagtgctgcccacaaccatgactggc gtcatgggtttagaaccctcctcttataagacctctgtgtaccggcAGCA GCAACCTGCGGTGCC	chrX:71137188-71137352	165	0.587879
	MED12-7N	ACACTGACGACATGGTTCTACATTGTGTTCTTATAGCAGCAGCAG	TACGGTAGCAGAGACTTGGTCTCTACCTGGGGCTGGGACT	TTGTGTTCTTATAGCAGCAGCAGcaacagcaacagcagcagcagcagcag cagcaacagcaacagcagcagcagcaacagcaacaacagcaacaccagca gcaacagcagcaacaggcggctcctccccaaccccagccccAGTCCCAGC CCCAGGTAG	chrX:71141216+71141374	159	0.591195
	MED12-8	ACACTGACGACATGGTTCTACACCACCCAGTTCCAGCGCCAG	TACGGTAGCAGAGACTTGGTCTGGTTCTCCTTGGGAAGGCAGGC	CCACCCAGTTCCAGCGCCAGgggcttcagcagacccagcagcagcaacag acagcagctttggtccggcaacttcaacaacagctctctagtaagcctGC CTGCCTTCCCAAGGAGAACC	chrX:71141875-71141994	120	0.591667
PIK3CA	PIK3CA-1	CAGAGGGGAAAAATaTGACAAA	AACAGAGAATCTCCATTTTAGCAC	CAGAGGGGAAAAATATGACAAAgaaagctatataagatattattttattt tacagagtaacagactagctagagacaatgaattaagggaaaatgacaaa gaacagctcaaagcaatttctacacgagatcctctctctgaaatcactga gcaggagaaagattttctatggagtcacaggtaaGTGCTAAAATGGAGAT TCTCTGTT	chr3:179218155+179218362	208	0.350962
	PIK3CA-2	ACACTGACGACATGGTTCTACATGAGCAAGAGGCTTTGGAGT	TACGGTAGCAGAGACTTGGTCTGGTCTTTGCCTGCTGAGAGT	TGAGCAAGAGGCTTTGGAGTatttcatgaaacaaatgaatgatgcacatc atggtggctggacaacaaaaatggattggatcttccacacaattaaacag catgcattgaactgaaaagataactgagaaaatgaaagctcactctggat tccacactgcactgttaataACTCTCAGCAGGCAAAGACC	chr3:179234250+179234439	190	0.4
	PIK3CA-3	ACACTGACGACATGGTTCTACACCACGACCATCATCAGGTGA	TACGGTAGCAGAGACTTGGTCTTGGAGGGGGTATTTTCTTGCTT	CCACGACCATCATCAGGTGAactgtggggcatccacttgatgcccccaag aatcctagtagaatgtttactaccaaatggaatgatagtgactttagaat gcctccgtgaggctacattaataaccataaagcatgaactatttaaagAA GCAAGAAAATACCCCCTCCA	chr3:179198832+179199001	170	0.423529
	PIK3CA-4	ACACTGACGACATGGTTCTACAGATAGTGACTTTAGAATGCCTCCG	TACGGTAGCAGAGACTTGGTCTTCCCTTTCTGCTTCTTGAGTAACA	GATAGTGACTTTAGAATGCCTCCGtgaggctacattaataaccataaagc atgaactatttaaagaagcaagaaaataccccctccatcaacttcttcaa gatgaatcttcttacattttcgtaagTGTTACTCAAGAAGCAGAAAGGGA	chr3:179198915+179199064	150	0.366667
	PIK3CA-5	ACACTGACGACATGGTTCTACATCGTAAGTGTTACTCAAGAAGCAGA	TACGGTAGCAGAGACTTGGTCTTGTATCATACCAATTTCTCGATTGAGG	TCGTAAGTGTTACTCAAGAAGCAGAaagggaagaattttttgatgaaaca agacgactttgtgaccttcggctttttcaaccctttttaaaagtaattga accagtaggcaaccgtgaagaaaagatCCTCAATCGAGAAATTGGTATGA TACA	chr3:179199034+179199187	154	0.37013
	PIK3CA-6	ACACTGACGACATGGTTCTACAGTGATCTTCCAAATCTACAGAGTTCC	TACGGTAGCAGAGACTTGGTCTCCATATCAAATTCACACACTGGCA	GTGATCTTCCAAATCTACAGAGTTCCctgtttgcaaaaaaaacatgttca tgctgtgtatgtaatagaatgttatattctttatgtaattttattaaagg ttttgctatcggcaTGCCAGTGTGTGAATTTGATATGG	chr3:179199591+179199728	138	0.326087
	PIK3CA-7	ACACTGACGACATGGTTCTACACGCATTTCCACAGCTACACC	TACGGTAGCAGAGACTTGGTCTAGCATCAGCATTTGACTTTACCTT	CGCATTTCCACAGCTACACCatatatgaatggagaaacatctacaaaatc cctttgggttataaatagtgcactcagaataaaaattctttgtgcaacct acgtgaatgtaaatattcgagacattgatAAGGTAAAGTCAAATGCTGAT GCT	chr3:179203658+179203810	153	0.352941
	PIK3CA-8	ACACTGACGACATGGTTCTACACGAGTGTGTGCATATGTGTATGT	TACGGTAGCAGAGACTTGGTCTTCTATATACTTCCTTACCTGGGATTGG	CGAGTGTGTGCATATGTGTATGTtgagtgtatacattagtatatacctac ttttttcttttagatctatgttcgaacaggtatctaccatggaggagaac ccttatgtgacaatgtgaacactcaaagagtaccttgttCCAATCCCAGG TAAGGAAGTATATAGA	chr3:179204440+179204605	166	0.373494
	PIK3CA-9	ACACTGACGACATGGTTCTACATTACATAGGTGGAATGAATGGCTGA	TACGGTAGCAGAGACTTGGTCTCTTTACCTCTTTAGCACCCTTTCG	TTACATAGGTGGAATGAATGGCTGAattatgatatatacattcctgatct tcctcgtgctgctcgactttgcctttccatttgctctgttaaaggcCGAA AGGGTGCTAAAGAGGTAAAG	chr3:179209587+179209706	120	0.416667
	PIK3CA-10	ACACTGACGACATGGTTCTACAGGGGAAGAAAAGTGTTTTGAAATGTG	TACGGTAGCAGAGACTTGGTCTCCATGAGGTACTGGCCAAAGA	GGGGAAGAAAAGTGTTTTGAAATGTGttttataatttagactagtgaata tttttctttgttttttaaggaacactgtccattggcatggggaaatataa acttgtttgattacacagacactctagtatctggaaaaatggctttgaaT CTTTGGCCAGTACCTCATGG	chr3:179210117+179210286	170	0.341176
	PIK3CA-11	ACACTGACGACATGGTTCTACAAGGAACACTGTCCATTGGCA	TACGGTAGCAGAGACTTGGTCTGATTTGATCCAGTAACACCAATAGGG	AGGAACACTGTCCATTGGCAtggggaaatataaacttgtttgattacaca gacactctagtatctggaaaaatggctttgaatctttggccagtacctca tggattagaagatttgctgaaCCCTATTGGTGTTACTGGATCAAATC	chr3:179210184+179210330	147	0.394558
	PIK3CA-12N	ACACTGACGACATGGTTCTACATGGCAGTCAAACCTTCTCTCT	TACGGTAGCAGAGACTTGGTCTTTGGCATGCTCTTCAATCAC	TGGCAGTCAAACCTTCTCTCTtatgtatatataatagcttttcttccatc tcttaggaaactccatgcttagagttggagtttgactggttcagcagtgt ggtaaagttcccagatatgtcaGTGATTGAAGAGCATGCCAA	chr3:179210375+179210516	142	0.401408
	PIK3CA-13	ACACTGACGACATGGTTCTACAATGACAAAGAAAGCTATATAAGAT	TACGGTAGCAGAGACTTGGTCTCCTGTGACTCCATAGAAAAT	ATGACAAAGAAAGCTATATAAGAtattattttattttacagagtaacaga ctagctagagacaatgaattaagggaaaatgacaaagaacagctcaaagc aatttctacacgagatcctctctctgaaatcactgagcaggagaaagATT TTCTATGGAGTCACAGG	chr3:179218169+179218335	167	0.347305
	PIK3CA-14	ACACTGACGACATGGTTCTACAACAGAGTAACAGACTAGCTAGAGACA	TACGGTAGCAGAGACTTGGTCTTCTCCATTTTAGCACTTACCTGTGA	ACAGAGTAACAGACTAGCTAGAGACAatgaattaagggaaaatgacaaag aacagctcaaagcaatttctacacgagatcctctctctgaaatcactgag caggagaaagattttctatggagTCACAGGTAAGTGCTAAAATGGAGA	chr3:179218206+179218353	148	0.391892
	PIK3CA-15	ACACTGACGACATGGTTCTACATGAACAGCATGCAAGAATGTTTATG	TACGGTAGCAGAGACTTGGTCTACATTTACCTGGGCTACTTCATCT	TGAACAGCATGCAAGAATGTTTATGtttattttgtttctcccacacagac actattgtgtaactatccccgaaattctacccaaattgcttctgtctgtt aaatggaattctagAGATGAAGTAGCCCAGGTAAATGT	chr3:179219148+179219285	138	0.369565
	PIK3CA-16N	ACACTGACGACATGGTTCTACATTTTAATTTTGCACGATTCTTTTAGA	TACGGTAGCAGAGACTTGGTCTGCCTCGACTTGCCTATTCAG	TTTTAATTTTGCACGATTCTTTTAGAtctgagatgcacaataaaacagtt agccagaggtttggcctgcttttggagtcctattgtcgtgcatgtgggat gtatttgaagcacCTGAATAGGCAAGTCGAGGC	chr3:179220961+179221093	133	0.421053
	PIK3CA-17	ACACTGACGACATGGTTCTACATTGTCGTGCATGTGGGATGT	TACGGTAGCAGAGACTTGGTCTACACAAACTAGAGTCACACACCT	TTGTCGTGCATGTGGGATGTatttgaagcacctgaataggcaagtcgagg caatggaaaagctcattaacttaactgacattctcaaacaggagaagaag gatgaaacacaaaAGGTGTGTGACTCTAGTTTGTGT	chr3:179221043+179221178	136	0.411765
	PIK3CA-18	ACACTGACGACATGGTTCTACAGTAGATATGATGCAGCCATTGACC	TACGGTAGCAGAGACTTGGTCTACTTGTCCATCGTCTTTCACCA	GTAGATATGATGCAGCCATTGACCtgtttacacgttcatgtgctggatac tgtgtagctaccttcattttgggaattggagatcgtcacaatagtaacat caTGGTGAAAGACGATGGACAAGT	chr3:179230000+179230123	124	0.419355
	PIK3CA-19	ACACTGACGACATGGTTCTACAAGCTGTTTCATATAGATTTTGGACACT	TACGGTAGCAGAGACTTGGTCTGCTCGAGCTCACCTCTCAAA	AGCTGTTTCATATAGATTTTGGACACTttttggatcacaagaagaaaaaa tttggttataaacgagaacgtgtgccatttgttttgacacaggatttctt aatagtgattagtaaaggagcccaagaatgcacaaagacaagagaaTTTG AGAGGTGAGCTCGAGC	chr3:179230223+179230388	166	0.36747
	PIK3CA-20	ACACTGACGACATGGTTCTACAAGATGTGTTACAAGGCTTAT	TACGGTAGCAGAGACTTGGTCTCCTCTTGCTCAGTTTTAT	AGATGTGTTACAAGGCTTATctagctattcgacagcatgccaatctcttc ataaatcttttctcaatgatgcttggctctggaatgccagaactacaatc ttttgatgacattgcatacattcgaaagaccctagccttagATAAAACTG AGCAAGAGG	chr3:179234102+179234260 159bp	159	0.396226
	PIK3CA-21	ACACTGACGACATGGTTCTACAGGAGTTTGACTGGTTCAGCAGTGTGG	TACGGTAGCAGAGACTTGGTCTGCCTTACCAGTCCTGCGTGGG	GGAGTTTGACTGGTTCAGCAGTGTGGtaaagttcccagatatgtcagtga ttgaagagcatgccaattggtctgtatcccgagaagcaggatttagctat tCCCACGCAGGACTGGTAAGGC	chr3:179210451+179210572 122bp	122	0.483607
TP53	TP53-1	GCCAGACTGCCTTCCGGGTC	ggtgggcctgcccttccaatg	GCCAGACTGCCTTCCGGGTCactgccatggaggagccgcagtcagatcct agcgtcgagccccctctgagtcaggaaacattttcagacctatggaaact gtgagtggatcCATTGGAAGGGCAGGCCCACC	chr17:7676489-7676620	132	0.583333
	TP53-2	cgaaaattccatgggactga	gatgggtgaaaagagcagtca	CGAAAATTCCATGGGACTGActttctgctcttgtctttcagacttcctga aaacaacgttctggtaaggacaagggttgggctggggacctggagggctg gggacctggagggctggggggctggggggctgaggacctggtcctcTGAC TGCTCTTTTCACCCATC	chr17:7676278-7676444	167	0.57485
	TP53-3	CAGCCTCTGGcATTCTGG	cctggtcctctgaCTGCTCT	CAGCCTCTGGCATTCTGGgagcttcatctggacctgggtcttcagtgaac cattgttcaatatcgtccggggacagcatcaaatcatccattgcttggga cggcaagggggactgtagatgggtgaaaAGAGCAGTCAGAGGACCAGG	chr17:7676161+7676308	148	0.533784
	TP53-4	GGAAACCGTAGCTGCCCTG	AAGACCCAGGTCCAGATGAA	GGAAACCGTAGCTGCCCTGgtaggttttctgggaagggacagaagatgac aggggccaggagggggctggtgcaggggccgccggtgtaggagctgctgg tgcaggggccacggggggagcagcctctggcattctgggagcTTCATCTG GACCTGGGTCTT	chr17:7676041+7676202	162	0.648148
	TP53-5	ATACGGCCAGGCATTGAAGT	CCTCCTGGCCCCTGTC	ATACGGCCAGGCATTGAAGTctcatggaagccagcccctcagggcaactg accgtgcaagtcacagacttggctgtcccagaatgcaagaagcccagacg gaaaccgtagctgccctggtaggttttctgggaagggacagaagatGACA GGGGCCAGGAGG	chr17:7675942+7676103	162	0.574074
	TP53-6	TGTGCTGTGACTGCTTGTAG	TGCCCTGACTTTCAACTCTGT	TGTGCTGTGACTGCTTGTAGatggccatggcgcggacgcgggtgccgggc gggggtgtggaatcaacccacagctgcacagggcaggtcttggccagttg gcaaaacatcttgttgagggcaggggagtactgtaggaagaggaaggagA CAGAGTTGAAAGTCAGGGCA	chr17:7675107+7675276	170	0.588235
	TP53-7	AGCTGCTCACCATCGCTA	CCAACTGGCCAAGACCT	AGCTGCTCACCATCGCTAtctgagcagcgctcatggtgggggcagcgcct cacaacctccgtcatgtgctgtgactgcttgtagatggccatggcgcgga cgcgggtgccgggcgggggtgtggaatcaacccacagctgcacagggcAG GTCTTGGCCAGTTGG	chr17:7675043+7675207	165	0.642424
	TP53-8	AACCAGCCCTGTCGTCTCT	GTGCAGCTGTGGGTTGATT	AACCAGCCCTGTCGTCTCTccagccccagctgctcaccatcgctatctga gcagcgctcatggtgggggcagcgcctcacaacctccgtcatgtgctgtg actgcttgtagatggccatggcgcggacgcgggtgccgggcgggggtgtg gAATCAACCCACAGCTGCAC	chr17:7675016+7675185	170	0.647059
	TP53-9	GTGGAAGGAAATTTGCGTGT	gccactgacaaccaccctta	GTGGAAGGAAATTTGCGTGTggagtatttggatgacagaaacacttttcg acatagtgtggtggtgccctatgagccgcctgaggtctggtttgcaactg gggtctctgggaggaggggtTAAGGGTGGTTGTCAGTGGC	chr17:7674803-7674942	140	0.528571
	TP53-10	agggctggttgcccagggtc	GGCGGCTCATAGGGCACCAC	AGGGCTGGTTGCCCAGGGTCcccaggcctctgattcctcactgattgctc ttaggtctggcccctcctcagcatcttatccgagtggaaggaaatttgcg tgtggagtatttggatgacagaaacacttttcgacatagtgtgGTGGTGC CCTATGAGCCGCC	chr17:7674863-7675025	163	0.539877
	TP53-11	ccaaggcgcactggcctcat	gtgcagggtggcaagtggct	CCAAGGCGCACTGGCCTCATcttgggcctgtgttatctcctaggttggct ctgactgtaccaccatccactacaactacatgtgtaacagttcctgcatg ggcggcatgaaccggaggcccatcctcaccatcatcacactggaagactc caggtcaggAGCCACTTGCCACCCTGCAC	chr17:7674155-7674333	179	0.564246
	TP53-12	GGTGCGTGTTTGTGCCTGTCC	cccttggtctcctccaccgct	GGTGCGTGTTTGTGCCTGTCCtgggagagaccggcgcacagaggaagaga atctccgcaagaaaggggagcctcaccacgagctgcccccagggagcact aagcgaggtaagcaagcaggacaagaAGCGGTGGAGGAGACCAAGGG	chr17:7673661-7673807	147	0.612245
	TP53-13	ggacctgatttccttactgcctcttgc	GCAGCTCGTGGTGAGGCTCC	GGACCTGATTTCCTTACTGCCTCTTGCttctcttttcctatcctgagtag tggtaatctactgggacggaacagctttgaggtgcgtgtttgtgcctgtc ctgggagagaccggcgcacagaggaagagaatctccgcaagaaaggGGAG CCTCACCACGAGCTGC	chr17:7673722-7673887	166	0.542169
	TP53-14	ggagaccaagggtgcagtta	ccacttgataagaggtcccaag	GGAGACCAAGGGTGCAGTTAtgcctcagattcacttttatcacctttcct tgcctctttcctagcactgcccaacaacaccagctcctctccccagccaa agaagaaaccactggatggagaatatttcacccttcaggtactaagtCTT GGGACCTCTTATCAAGTGG	chr17:7673504-7673672	169	0.485207
	TP53-15	GTTCCGAGAGCTGAATGAGG	gaaggcaggatgagaatgga	GTTCCGAGAGCTGAATGAGGccttggaactcaaggatgcccaggctggga aggagccaggggggagcagggctcactccaggtgagtgacctcagcccct tcctggccctactcccctgccttcctaggttggaaagccataggatTCCA TTCTCATCCTGCCTTC	chr17:7670524-7670689	166	0.596386
	TP53-16	aacttgaaccatcttttaactcagg	cCTGGAGTGAGCCCTGCT	AACTTGAACCATCTTTTAACTCAGGtactgtgtatatacttacttctccc cctcctctgttgctgcagatccgtgggcgtgagcgcttcgagatgttccg agagctgaatgaggccttggaactcaaggatgcccaggctgggaaggagc caggggggAGCAGGGCTCACTCCAGG	chr17:7670608-7670783	176	0.551136
	TP53-17	tgtcatctctcctccctgct	GTGGGAGGCTGTCAGTGG	TGTCATCTCTCCTCCCTGCTtctgtctcctacagccacctgaagtccaaa aagggtcagtctacctcccgccataaaaaactcatgttcaagacagaagg gcctgactcagactgacattctccacttcttgttccCCACTGACAGCCTC CCAC	chr17:7669571-7669724	154	0.512987
MLL3	MLL3-1	CCCTTTGGTTTGTGCATGGGGC	CTGTCACAAGACGGGTGCCACT	CCCTTTGGTTTGTGCATGGGGCaaagcatagttttgtccttaaaaaacat gcattgtgctttaatggcgcaagtgaagtgataaatgttggtgcatcgaa atctgtggcatccactAGTGGCACCCGTCTTGTGACAG	chr7:152148398-152148535	138	0.449275
	MLL3-2	CAGTTCAAGTGGACCCACAG	TTTCTAAAGAAATTGGGCACTTC	CAGTTCAAGTGGACCCACAGatccaagtcaaggttgagtagccttgctgg tccatctgtcaatccatcaccttcttcatgacaaaagcaacatttccgat agtctttgggcacaggatcaggtttaaggGAAGTGCCCAATTTCTTTAGA AA	chr7:152148632-152148783	152	0.447368
	MLL3-3	TCACCCTCACCTGTTTCAAGTGGGT	GCAAACGGACTCAGAGGACGGG	TCACCCTCACCTGTTTCAAGTGGGTaaacgtgtcagtgctagagtacata gcttgtttctcctcttcgtcctttttccttttctttgagcgaggtgctgc tttctcaCCCGTCCTCTGAGTCCGTTTGC	chr7:152158853-152158981	129	0.488372
	MLL3-4	GCTACAGCGTTTCCTTCTACCTT	CAAGCAACTCCAAATCAACAGA	GCTACAGCGTTTCCTTCTACCTTactaccattctgttcctccaatttagg ctcctcttggcctgggcaggactctgtctcagccttttccagttttatct cttctgttttggcaggggtttccatggagagcttgtctacttctgaattt gcatacgTCTGTTGATTTGGAGTTGCTTG	chr7:152162328-152162506	179	0.463687
	MLL3-5	TGACCTGGAATGAGCCCTGGGT	AACTCTGCCGGCCTCCCCAT	TGACCTGGAATGAGCCCTGGGTttacctgcacaccctgagaaaaaacatg gtttaccctagagactactgtcacattagaattcatggcattatccaaaa cacggccaggcggtgctatgaaaggaggcaaacttgacacatgattggAT GGGGAGGCCGGCAGAGTT	chr7:152176463-152176630	168	0.488095
	MLL3-6	TGCCTCTACAACGCTGCCAGG	AGCTTGCCAGTTCAGCAGCACA	TGCCTCTACAACGCTGCCAGGtggagcactgaaaggcagccgttgccttc cgtcaggagccctatgtctcagttcaatatatgcttggcccagtatgtTG TGCTGCTGAACTGGCAAGCT	chr7:152177701+152177820	120	0.541667
	MLL3-7	GGCACAAGCCACCACACCCA	CAGCGTGGACCCTATCCTCCTGA	GGCACAAGCCACCACACCCAgctctgtttccctcttctaatagcaattta aattcggcaggaaattaaaagcattacctaaatccatgaggtctcatccc catactagcaacaTCAGGAGGATAGGGTCCACGCTG	chr7:152179757-152179892	136	0.463235
	MLL3-8	GGTGCAGGTGTCAACAAGGGTCG	TGGGCCTATCCCGGTCTCCTG	GGTGCAGGTGTCAACAAGGGTCGtgcatatgagtcaggtatcctttgtct ttgaaacacatctgccctaggagatggtttagtaaagtgatcactggttc cagctgctatagggccttttgcagtttgttctgaaactaCAGGAGACCGG GATAGGCCCA	chr7:152181756-152181915	160	0.48125
	MLL3-9	TCTGACAGGGGATGGCCTATTTGCT	CCCTCGACCACCTCCTGTGGG	TCTGACAGGGGATGGCCTATTTGCTgttgtctcattcatttgaaggggcc tagataccgatgataaaggtgtacagttttccactggtgcagcagaattt cttctggaaaaactatggCCCACAGGAGGTGGTCGAGGG	chr7:152182010+152182148	139	0.482014
	MLL3-10	CCTGGATGGGAATCCGGGATGGG	CCCTTGACACCTCAGCCTGGCA	CCTGGATGGGAATCCGGGATGGGgctggaggaggaggtggagcttgtggc tttacaaacacatcatctgaagatgtagacgtaggggtactgggtggctg ttttgtaaacagttctttatggaatgactgtgcaggagacatatttccat TGCCAGGCTGAGGTGTCAAGGG	chr7:152182264-152182435	172	0.505814
	MLL3-11	TTCACCATCCCTTGAATGCT	CCAGGATGGTGTGTGTTTGA	TTCACCATCCCTTGAATGCTctgattggatgtctggaggggtctgaagga cggccacgctattctgatttataatcttcaatttcaattttggttttgac cgttttcttcttggaactgtaactgtgaggctctgtaactgagtcatccc tgattcagTCAAACACACACCATCCTGG	chr7:152220539-152220716	178	0.438202
	MLL3-12	TGAAGCAAGCCTCACCCCAGGT	ACATAGGGCCGTGGGTCTGGA	TGAAGCAAGCCTCACCCCAGGTaatacaacagctccgattccacttttca gctttgacctgcctcggccacctcgccccgacagtcctgcacctcgaggt ctccgctttcctggaaaTCCAGACCCACGGCCCTATGT	chr7:152235802-152235939	138	0.57971
	MLL3-13	CAGAATTTTCTTTCTGTTCCTTTTC	GGAACCTGAAACAGTGGTATCC	CAGAATTTTCTTTCTGTTCCTTTTCtccttgtagcctttctataaccaac tgttcctcaggacataatgaaatactttcctcatgtggggacactaaggt ttctagtggaagagtgacagattccatgactaattttggaggccttgatt cttctctGGATACCACTGTTTCAGGTTCC	chr7:152248243-152248421	179	0.407821
	MLL3-14	TCCAGGCGTTATTCTGAATTG	CGCTTAAAGCAGTTGAATAAAGCTA	TCCAGGCGTTATTCTGAATTGttttaagtctccttgtcctaaggaacttt tttccccacagtaacaaaaagcgcagagctgttcactagtaaaaatgaaa tgtaagtcagagaaggagaaaagTAGCTTTATTCAACTGCTTTAAGCG	chr7:152315254-152315401	148	0.378378
	MLL3-15	GACACCTGACCCATCTTTGAA	CTTTTGGTCCTTCCCCAAAT	GACACCTGACCCATCTTTGAAaattggggacatactgtttaacattaaga agtcatttaatcttttacctcagcagctgtaggatgcagagtaattgcta cagatataagacctgatctgggaccATTTGGGGAAGGACCAAAAG	chr7:152153942-152154086	145	0.406897
	MLL3-16	CAGTTGCTGGTACTAATCTGCTG	CCTGAGGGCAGTATTTGTTCA	CAGTTGCTGGTACTAATCTGCTGtaagtataatttaaaacaaaagaaaaa agttgtcgtttttatgatttacacttaccagtccttcagctgggttctgc ttctcaactagtttattatcctttgtacagtcatcttcTGAACAAATACT GCCCTCAGG	chr7:152162039-152162197	159	0.358491
	MLL3-17	CCCTGATTGTGTATTGGCAAC	CTAGAGCTTGGCGGAAAAGA	CCCTGATTGTGTATTGGCAACagctgtgttggtgggggaggctgtggcaa tggagttggctgagtgttcgcaggactaagtacagctgtaaataagtctt caacaTCTTTTCCGCCAAGCTCTAG	chr7:152194008-152194132	125	0.496
KRAS	KRAS-1	AGAATGGTCCTGCACCAGTAA	AAACTTGTGGTAGTTGGAGCTG	AGAATGGTCCTGCACCAGTAAtatgcatattaaaacaagatttacctcta ttgttggatcatattcgtccacaaaatgattctgaattagctgtatcgtc aaggcactcttgcctacgccacCAGCTCCAACTACCACAAGTTT	chr12:25245229-25245372	144	0.402778
	KRAS-2N	TTGTTGGATCATATTCGTCCAC	AAGGCCTGCTGAAAATGACT	TTGTTGGATCATATTCGTCCACaaaatgattctgaattagctgtatcgtc aaggcactcttgcctacgccaccagctccaactaccacaagtttatattc AGTCATTTTCAGCAGGCCTT	chr12:25245279+25245398	120	0.425
	KRAS-3	CCCAGTCCTCATGTACTGGTCCCT	CCAGACTGTGTTTCTCCCTTCTCAGG	CCCAGTCCTCATGTACTGGTCCCTcattgcactgtactcctcttgacctg ctgtgtcgagaatatccaagagacaggtttctccatcaattactacttgc ttcctgtaggaatCCTGAGAAGGGAGAAACACAGTCTGG	chr12:25227299-25227437	139	0.482014
CDKN2A	CDKN2A-1N	GCGCGTGAGCTGAGGCAAGA	AGAGGCAGTAACCATGCCCGC	GCGCGTGAGCTGAGGCAAGAccggagactggtctcccgggctgaactttc tgtgctggaaaatgaatgctctgagctttggaagctctcagggtacaaat tctcagatcatcagtcctcacctgagggaccttccgcggcatctatGCGG GCATGGTTACTGCCTCT	chr9:21970781+21970947	167	0.550898
	CDKN2A-2	TCCTCAGCCAGGTCCACGGG	GGAGCCCAACTGCGCCGAC	TCCTCAGCCAGGTCCACGGGcagacggccccaggcatcgcgcacgtccag ccgcgccccggcccggtgcagcaccaccagcgtgtccaggaagccctccc gggcagcgtcgtgcacgggtcgggtgagagtggcgggGTCGGCGCAGTTG GGCTCC	chr9:21971000+21971155	156	0.75
	CDKN2A-3	TGCACGGGTCGGGTGAGAGT	CCTTTCCGTCATGCCGGCCC	TGCACGGGTCGGGTGAGAGTggcggggtcggcgcagttgggctccgcgcc gtggagcagcagcagctccgccactcgggcgctgcccatcatcatgacct gccagagagaacagaatggtcagagccagggtggGGGCCGGCATGACGGA AAGG	chr9:21971111-21971264	154	0.681818
	CDKN2A-4	GCTCCCGCTGCAGACCCTCT	GCCTTCGGCTGACTGGCTGG	GCTCCCGCTGCAGACCCTCTacccacctggatcggcctccgaccgtaact attcggtgcgttgggcagcgcccccgcctccagcagcgcccgcacctcct ctacccgaccccgggccgcggccgtggCCAGCCAGTCAGCCGAAGGC	chr9:21974652-21974798	147	0.727891
APC	APC-1	GGAAGGCAAAGTCCTTCACA	TGTGGTTGGAACTTGAGGTG	GGAAGGCAAAGTCCTTCACAgaatgaaagatgggcaagacccaaacacat aatagaagatgaaataaaacaaagtgagcaaagacaatcaaggaatcaaa gtacaacttatcctgtttatactgagagcactgatgataaaCACCTCAAG TTCCAACCACA	chr5:112838709-112838869	161	0.378882
	APC-2	GTGAGCAAAGACAATCAAGGAA	TCCATGATTAGAACCCACTCG	GTGAGCAAAGACAATCAAGGAAtcaaagtacaacttatcctgtttatact gagagcactgatgataaacacctcaagttccaaccacattttggacagca ggaatgtgtttctccatacaggtcacggggagccaatggttcagaaacaa atCGAGTGGGTTCTAATCATGGA	chr5:112838782-112838954	173	0.421965
	APC-3N	GCATGAAGAAGAAGAGAGACCAA	TGTCCAGATGAACTCTTTGAGAA	GCATGAAGAAGAAGAGAGACCAAcaaattatagcataaaatataatgaag agaaacgtcatgtggatcagcctattgattatagtttaaaatatgccaca gatattccttcatcacagaaacagtcattttcaTTCTCAAAGAGTTCATC TGGACA	chr5:112839050-112839205	156	0.333333
	APC-4	GCTCCATCCAAGTTCTGCAC	CTTCAGCTGATGACAAAGATGATAA	GCTCCATCCAAGTTCTGCACagagtagaagtggtcagcctcaaaaggctg ccacttgcaaagtttcttctattaaccaagaaacaatacagacttattgt gtagaagatactccaatatgtttttcaagatgtagttcaTTATCATCTTT GTCATCAGCTGAAG	chr5:112839284+112839447	164	0.384146
	APC-5	TGCCACTTGCAAAGTTTCTTC	GCTATTTGCAGGGTATTAGCAGA	TGCCACTTGCAAAGTTTCTTCtattaaccaagaaacaatacagacttatt gtgtagaagatactccaatatgtttttcaagatgtagttcattatcatct ttgtcatcagctgaagatgaaataggatgtaatcagacgacacaggaagc agatTCTGCTAATACCCTGCAAATAGC	chr5:112839332-112839508	177	0.355932
	APC-6	CAGACGACACAGGAAGCAGA	TGCTGGATTTGGTTCTAGGG	CAGACGACACAGGAAGCAGAttctgctaataccctgcaaatagcagaaat aaaagaaaagattggaactaggtcagctgaagatcctgtgagcgaagttc cagcagtgtcacagcaCCCTAGAACCAAATCCAGCA	chr5:112839465+112839600	136	0.455882
	APC-7	CCCACTCATGTTTAGCAGATGT	CATGGTTTGTCCAGGGCTAT	CCCACTCATGTTTAGCAGATGTacttctgtcagttcacttgatagttttg agagtcgttcgattgccagctccgttcagagtgaaccatgcagtggaatg gtaagtggcattataagccccagtgatcttccagATAGCCCTGGACAAAC CATG	chr5:112839734-112839887	154	0.467532
	APC-8	AGCTCAAACCAAGCGAGAAG	CACTCAGGCTGGATGAACAA	AGCTCAAACCAAGCGAGAAGtacctaaaaataaagcacctactgctgaaa agagagagagtggacctaagcaagctgcagtaaatgctgcagttcagagg gtccaggttcttccagatgctgatactttattacattttgccacggaaag tactccagatggattttcTTGTTCATCCAGCCTGAGTG	chr5:112839929-112840116	188	0.441489
	APC-9	GGACCTATTAGATGATTCAGATGATG	ACAGGCAGCTGACTTGGTTT	GGACCTATTAGATGATTCAGATGATGatgatattgaaatactagaagaat gtattatttctgccatgccaacaaagtcatcacgtaaagcaaaaaagcca gcccagactgcttcaaaattacctccacctgtggcaaggAAACCAAGTCA GCTGCCTGT	chr5:112840277+112840435	159	0.408805
	APC-10	CGTCTTCTTCTGCACCCAAC	TCTGTTTCTTTGAATCTTTGTTGTCT	CGTCTTCTTCTGCACCCAACaaaaatcagttagatggtaagaaaaagaaa ccaacttcaccagtaaaacctataccacaaaatactgaatataggacacg tgtaagaaaaaatgcagactcaaaaaataatttaaatgctgagagagttt tctcAGACAACAAAGATTCAAAGAAACAGA	chr5:112840858+112841037	180	0.333333
ARID2	ARID2-1	GACGAGGAGCCACAAACAC	TTCCCTGAGTTTGAAGGAGGT	GACGAGGAGCCACAAACACcagcaatggggatacaaaggaaaatgaaatg catgtgggaagtcttttaaatgggagaaagtacagtgactcaagtctACC TCCTTCAAACTCAGGGAA	chr12:45851938+45852055	118	0.440678
	ARID2-2	TGAAATGCATGTGGGAAGTC	CCAGATGCTCCATTCTCACC	TGAAATGCATGTGGGAAGTCttttaaatgggagaaagtacagtgactcaa gtctacctccttcaaactcagggaaaattcaaagtgagactaatcagtgc tcactaatcagtaatgggccatcattggaattaGGTGAGAATGGAGCATC TGG	chr12:45851981+45852133	153	0.411765
	ARID2-3	CTCAGGGAAAATTCAAAGTGAGAC	GATTCCATTAACTAGCGGTTTTCTC	CTCAGGGAAAATTCAAAGTGAGACtaatcagtgctcactaatcagtaatg ggccatcattggaattaggtgagaatggagcatctgggaaacagaactca gaacaaatagacatgcaagatatcaaaagtgatttGAGAAAACCGCTAGT TAATGGAATC	chr12:45852047+45852206	160	0.3875
	ARID2-4	CAGAACACTCCTATGCCACCTTCACC	CCAGGTTTTCTCATTGGATCTCCAGGC	CAGAACACTCCTATGCCACCTTCACCagctgtacaagtgcagggccagcc taacagttctcagccttctccattcagtggatccagtcaGCCTGGAGATC CAATGAGAAAACCTGG	chr12:45860798+45860913	116	0.525862
CDH1	CDH1-1	AGTCAAAAGGCCTCTACGG	CAGCGCACTAAAACAACAGC	AGTCAAAAGGCCTCTACGGtttcataacccacagatccatttcttggtct acgcctgggactccacctacagaaagttttccaccaaagtcacgctgaat acagtggggcaccaccaccgccccccgccccatcaggtatgttggcattt ttctgagaagttcGCTGTTGTTTTAGTGCGCTG	chr16:68801758+68801940	183	0.513661
	CDH1-2	CCCAAAGTGCAGCTTGTCTA	CCACACTGATGACTCCTGTGTT	CCCAAAGTGCAGCTTGTCTAaaccttcatctccttgaactcttccaggaa cctctgtgatggaggtcacagccacagacgcggacgatgatgtgaacacc tacaatgccgccatcgcttacaccatcctcagccaagatcctgagctccc tgacaaaaatatgttcaccattaacaggAACACAGGAGTCATCAGTGTGG	chr16:68811637+68811836	200	0.5
	CDH1-3	AGATCCTGAGCTCCCTGACA	ACCCTCTGGATCCTCCTGAC	AGATCCTGAGCTCCCTGACAaaaatatgttcaccattaacaggaacacag gagtcatcagtgtggtcaccactgggctggaccgagaggtcagggGTCAG GAGGATCCAGAGGGT	chr16:68811772+68811886	115	0.530435
	CDH1-4	TGACACATCTCTTTGCTCTGC	AATGCCATCGTTGTTCACTG	TGACACATCTCTTTGCTCTGCagtacaagggtcaggtgcctgagaacgag gctaacgtcgtaatcaccacactgaaagtgactgatgctgatgcccccaa taccccagcgtgggaggctgtatacaccatattgaatgatgatggtggac aatttgtcgtcaccacaaatcCAGTGAACAACGATGGCATT	chr16:68813290+68813480	191	0.486911
	CDH1-5	TGCCTGAGAACGAGGCTAAC	TTTCTGCATCTTGCCAGGTA	TGCCTGAGAACGAGGCTAACgtcgtaatcaccacactgaaagtgactgat gctgatgcccccaataccccagcgtgggaggctgtatacaccatattgaa tgatgatggtggacaatttgtcgtcaccacaaatccagtgaacaacgatg gcattttgaaaacagcaaaggtttgtatggTACCTGGCAAGATGCAGAAA	chr16:68813326+68813525	200	0.465
	CDH1-6	TGTTTCGTTTTGTTTTTAACTTCA	ACAAAGATGGGGGCTTCATT	TGTTTCGTTTTGTTTTTAACTTCAttgtttctgctctctagggcttggat tttgaggccaagcagcagtacattctacacgtagcagtgacgaatgtggt accttttgaggtctctctcaccacctccacagccaccgtcaccgtggatg tgctggatgtgAATGAAGCCCCCATCTTTGT	chr16:68815474+68815654	181	0.475138
	CDH1-7	ACCGTGGATGTGCTGGAT	CCAGTTGCTGCAAGTCAGTT	ACCGTGGATGTGCTGGATgtgaatgaagcccccatctttgtgcctcctga aaagagagtggaagtgtccgaggactttggcgtgggccaggaaatcacat cctacactgcccaggagccagacacatttatggaacagaaaataacgtaa gtgtgaggatttttcAACTGACTTGCAGCAACTGG	chr16:68815614+68815798	185	0.491892
	CDH1-8	AGAGCTTGTCCCCGTTCAG	AGGCAGCAAAGGCTCAGAT	AGAGCTTGTCCCCGTTCAGatatcggatttggagagacactgccaactgg ctggagattaatccggacactggtgccatttccactcgggctgagctgga cagggaggattttgagcacgtgaagaacagcacgtacacagccctaatca tagctacagacaatggtaagggggcctcATCTGAGCCTTTGCTGCCT	chr16:68819261+68819457	197	0.527919
	CDH1-9	CTCTGTCTCCCCCACCATC	TCACCACTGAGCTACCAAGG	CTCTGTCTCCCCCACCATCccagttctgattctgctgctcttgctgtttc ttcggaggagagcggtggtcaaagagcccttactgcccccagaggatgac acccgggacaacgtttattactatgatgaagaaggaggcggagaagagga ccaggtgggttttgaaaaCCTTGGTAGCTCAGTGGTGA	chr16:68828151+68828338	188	0.531915
	CDH1-10	TTCCTCATCTTCTTTCCTTTTAGG	CCTCCCAGAGAAACAGAGAACT	TTCCTCATCTTCTTTCCTTTTAGGcctccgtttctggaatccaagcagaa ttgctcacatttcccaactcctctcctggcctcagaagacagaagagaga ctgggttattcctcccatcagctgcccagaaaatgaaaaaggcccatttc ctaaaaacctggttcaggtagagaaagaAGTTCTCTGTTTCTCTGGGAGG	chr16:68808401+68808600	200	0.465
	CDH1-11	CCAGTGTTGGGATCCTTCTT	TGGCAATGCGTTCTCTATCC	CCAGTGTTGGGATCCTTCTTtactaattctttttctttcattttgtcttc agatcaaatccaacaaagacaaagaaggcaaggttttctacagcatcact ggccaaggagctgacacaccccctgttggtgtctttattattgaaagaga aacaggatggctgaaggtgacagagcctctGGATAGAGAACGCATTGCCA	chr16:68808641+68808840	200	0.43
	CDH1-12	ACCCCCTGTTGGTGTCTTTA	GTTACCCCGGTGTCAACAAG	ACCCCCTGTTGGTGTCTTTAttattgaaagagaaacaggatggctgaagg tgacagagcctctggatagagaacgcattgccacatacactgtaagtatc tcttagaagCTTGTTGACACCGGGGTAAC	chr16:68808758+68808886	129	0.457364
	CDH1-13	CAGAGCTCAAGTCACCCTCA	GGAAGAGCACCTTCCATGAC	CAGAGCTCAAGTCACCCTCActtggttctttcagctcttctctcacgctg tgtcatccaacgggaatgcagttgaggatccaatggagattttgatcacg gtaaccgatcagaatgacaacaagcccgaattcacccaggaggtctttaa ggggtctGTCATGGAAGGTGCTCTTCC	chr16:68810163+68810339	177	0.497175
	CDH1-14	GAATGACAACAAGCCCGAAT	TTTGGGGTCCAAAGAACCTA	GAATGACAACAAGCCCGAATtcacccaggaggtctttaaggggtctgtca tggaaggtgctcttccaggtatatccactaatgagaatctgaatactcag aaagactctTAGGTTCTTTGGACCCCAAA		129	0.449612
	CDH1-15	CCTGGTCCTGACTTGGTTGT	TTCTTTGGAAACCCTCTAAGGAG	CCTGGTCCTGACTTGGTTGTgtcgatctctctgcagagtttccctacgta taccctggtggttcaagctgctgaccttcaaggtgaggggttaagcacaa cagcaacagctgtgatcacagtcactgacaccaacgataatcctccgatc ttcaatcccaccacggtaattctataaCTCCTTAGAGGGTTTCCAAAGAA	chr16:68812099+68812298	200	0.485
	CDH1-16	CAAGCTGCCACATTTTCTGT	GGGAGATGTATTGGGAGGAA	CAAGCTGCCACATTTTCTGTgtattttctcttaggttctccagttgctac tggaacagggacacttctgctgatcctgtctgatgtgaatgacaacgccc ccataccagaacctcgaactatattcttctgtgagaggaatccaaagcct caggtcataaacatcattgatgcagaccTTCCTCCCAATACATCTCCC	chr16:68821967+68822164	198	0.459596
	CDH1-17	AGGAATCCAAAGCCTCAGGT	GATCTGGGGGAAGGGAAG	AGGAATCCAAAGCCTCAGGTcataaacatcattgatgcagaccttcctcc caatacatctcccttcacagcagaactaacacacggggcgagtgccaact ggaccattcagtacaacgacccaagtgggtacctgagttttattttggca actttgctccaactgccatgCTTCCCTTCCCCCAGATC	chr16:68822102+68822289	188	0.494681
	CDH1-18	CCCCTGGTCTCATCATTTCT	GCTGTGCCTTCCTACAGACG	CCCCTGGTCTCATCATTTCTttttattgctttctccagcccaagaatcta tcattttgaagccaaagatggccttagaggtgggtgactacaaaatcaat ctcaagctcatggataaccagaataaagaccaagtgaccaccttagaggt cagcgtgtgtgactgtgaaggggccgctggCGTCTGTAGGAAGGCACAGC	chr16:68823361+68823560	200	0.475
	CDH1-19	AGCGTGTGTGACTGTGAAGG	TCAAAGGCTGAGTCACTTGC	AGCGTGTGTGACTGTGAAGGggccgctggcgtctgtaggaaggcacagcc tgtcgaagcaggattgcaaattcctgccattctggggattcttggaggaa ttcttgctttgctaagtaagtccagctgGCAAGTGACTCAGCCTTTGA	chr16:68823512+68823659	148	0.527027
	CDH1-20	TCCTACTCTTCATTGTACTTCAACCTT	CCACGTGGATTACTTACTTCATCA	TCCTACTCTTCATTGTACTTCAACCTTttttctccaaaggactttgactt gagccagctgcacaggggcctggacgctcggcctgaagtgactcgtaacg acgttgcaccaaccctcatgagtgtcccccggtatcttccccgccctgcc aatcccgatgaaattggaaattttatTGATGAAGTAAGTAATCCACGTGG	chr16:68829615+68829814	200	0.5
	CDH1-21	CGGCCTGAAGTGACTCGTA	GAGCTTAGAGATGAGCCATGC	CGGCCTGAAGTGACTCGTAacgacgttgcaccaaccctcatgagtgtccc ccggtatcttccccgccctgccaatcccgatgaaattggaaattttattg atgaagtaagtaatccacgtggaaagccaaaGCATGGCTCATCTCTAAGC TC	chr16:68829693+68829844	152	0.5
	CDH1-22	ACCCGGTTCCATCTACCTTT	TTTCCAACCCCTCCCTACTC	ACCCGGTTCCATCTACCTTTcccccaccccaggtctcctcttggctctgc caggagccggagccctgccaccctggctttgacgccgagagctacacgtt cacggtgccccggcgccacctggagagaggccgcgtcctgggcagaggtg agggcgcgctgccggtgtccctgggcgGAGTAGGGAGGGGTTGGAAA	chr16:68738265+68738461	197	0.685279
	CDH1-23	ACTCCAGCCCGCTCCA	TCAGGACCCGAACTTTCTTG	ACTCCAGCCCGCTCCAgcccggcccgacccgaccgcacccggcgcctgcc ctcgctcggcgtccccggccagccatgggcccttggagccgcagcctctc ggcgctgctgctgctgctgcaggtaccccggatcccctgacttgcgaggg acgcattcgggccgcaagctccgcgccccagccctgcgccccttcctctc ccgtcgtcaccgcttcccttcttcCAAGAAAGTTCGGGTCCTGA	chr16:68737342+68737585	244	0.721311
	CDH1-24	TCTGCCCTGCAGTGAATTTT	GGCGTAGACCAAGAAATGGA	TCTGCCCTGCAGTGAATTTTgaagattgcaccggtcgacaaaggacagcc tatttttccctcgacacccgattcaaagtgggcacagatggtgtgattac agtcaaaaggcctctacggtttcataacccacagaTCCATTTCTTGGTCT ACGCC	chr16:68801658+68801812	155	0.483871
GATA3	GATA3-1	GGCGCCGTCTTGATACTTT	TACCAACCTGGGTAGCGAAG	GGCGCCGTCTTGATACTTTcagaaagaatgcattccctgtaaaaaaaaaa aaaaaatactgagagagggagagagagagagaagaagagagagagacgga gggagagcgagacagagcgagcaacgcaatctgaccgagcaggtcgtacg ccgccgcctcctcctcctctctgctCTTCGCTACCCAGGTTGGTA	chr10:8054704+8054898	195	0.517949
	GATA3-2	CGCAGAATTGCAGAGTCGT	GGGTCGTTGAATGATTTGCT	CGCAGAATTGCAGAGTCGTcgcccctttttacaacctggtcccgttttat tctgccgtacccagtttttggatttttgtcttccccttcttctctttgct aaacgacccctccaagataatttttaaaaaaccttctcctttgctcacct ttgcttcccagccttcccatccccccaccgaaAGCAAATCATTCAACGAC CC	chr10:8055349+8055550	202	0.470297
	GATA3-3	TCTTCCCCTTCTTCTCTTTGC	GGGTCGTTGAATGATTTGCT	TCTTCCCCTTCTTCTCTTTGCtaaacgacccctccaagataatttttaaa aaaccttctcctttgctcacctttgcttcccagccttcccatccccccac cgaaAGCAAATCATTCAACGACCC	chr10:8055427+8055550	124	0.467742
	GATA3-4	ACCTTCTCCTTTGCTCACCTTT	GTCCGCCGTCACCTCCAT	ACCTTCTCCTTTGCTCACCTTTgcttcccagccttcccatccccccaccg aaagcaaatcattcaacgacccccgaccctccgacggcaggagccccccg acctcccaggcggaccgccctccctccccgcgcgcgggttccgggcccgg cgagagggcgcgagcacagccgaggccATGGAGGTGACGGCGGAC	chr10:8055479+8055673	195	0.702564
	GATA3-5	AGAGGGCGCGAGCACAG	GATGTTAAAAAGCACATCCACCTC	AGAGGGCGCGAGCACAGccgaggccatggaggtgacggcggaccagccgc gctgggtgagccaccaccaccccgccgtgctcaacgggcagcacccggac acgcaccacccgggcctcagccactcctacatggacgcggcgcagtaccc gctgccggagGAGGTGGATGTGCTTTTTAACATC	chr10:8055631+8055814	184	0.690217
	GATA3-6	CCTCAGCCACTCCTACATGG	GTGGTGGGTCGGAGGGTA	CCTCAGCCACTCCTACATGGacgcggcgcagtacccgctgccggaggagg tggatgtgctttttaacatcgacggtcaaggcaaccacgtcccgccctac tacggaaactcggtcagggccacggtgcagaggTACCCTCCGACCCACCA C	chr10:8055745+8055895	151	0.629139
	GATA3-7	CCTTCTCTCTCCTGCCCTTT	GATGGACGTCTTGGAGAAGG	CCTTCTCTCTCCTGCCCTTTccccgttgccccacagggagccaggtgtgc cgcccgcctctgcttcatggatccctaccctggctggacggcggcaaagc cctgggcagccaccacaccgcctccccctggaatctcagccCCTTCTCCA AGACGTCCATC	chr10:8058269+8058429	161	0.664596
	GATA3-8	CTGCTTCATGGATCCCTACC	CGACAAGGAGGAGGACGAG	CTGCTTCATGGATCCCTACCctggctggacggcggcaaagccctgggcag ccaccacaccgcctccccctggaatctcagccccttctccaagacgtcca tccaccacggctccccggggcccctctccgtctaccccccggcCTCGTCC TCCTCCTTGTCG	chr10:8058328+8058489	162	0.685185
	GATA3-9	GCCCCTCTCCGTCTACCC	AGGCACTCTTTCTCGTCCTG	GCCCCTCTCCGTCTACCCcccggcctcgtcctcctccttgtcggggggcc acgccagcccgcacctcttcaccttcccgcccaccccgccgaaggacgtc tccccggacccatcgctgtccaccccaggctcggccggctcggcccggCA GGACGAGAAAGAGTGCCT	chr10:8058447+8058614	168	0.732143
	GATA3-10	GGACCCATCGCTGTCCAC	GTAGGTGGTGATGGGGTGGT	GGACCCATCGCTGTCCACcccaggctcggccggctcggcccggcaggacg agaaagagtgcctcaagtaccaggtgcccctgcccgacagcatgaagctg gagtcgtcccactcccgtggcagcatgaccgccctgggtggagcctcctc gtcgacccACCACCCCATCACCACCTAC	chr10:8058552+8058729	178	0.679775
	GATA3-11	AGCATGAAGCTGGAGTCGTC	TTGGGCCTGGACTTGCAT	AGCATGAAGCTGGAGTCGTCccactcccgtggcagcatgaccgccctggg tggagcctcctcgtcgacccaccaccccatcaccacctacccgccctacg tgcccgagtacagctccggactcttcccccccagcagcctgctgggcggc tcccccaccggcttcggATGCAAGTCCAGGCCCAA	chr10:8058640+8058824	185	0.681081
	GATA3-12	TACGTGCCCGAGTACAGCTC	GGAGGAGGGAGGAGAAAAGG	TACGTGCCCGAGTACAGCTCcggactcttcccccccagcagcctgctggg cggctcccccaccggcttcggatgcaagtccaggcccaaggcccggtcca gcacaggtaggagccagctcttccctggagCCTTTTCTCCTCCCTCCTCC	chr10:8058736+8058885	150	0.673333
	GATA3-13	AACTCAGGGGCTCATCCAG	GCAGAATAAAACGGGACCAG	AACTCAGGGGCTCATCCAGgtctcccattctctcccttgcaggtgacccg aggagggactccgcctccgagcggctgaggaccccggtgcagaggagcct ggctcgcagaattgcagagtcgtcgcccctttttacaacCTGGTCCCGTT TTATTCTGC	chr10:8055245+8055403	159	0.610063
	GATA3-14	CCCTAAGTGGCTTATCTGTGC	CATCCCTTCCCGAGAACTTA	CCCTAAGTGGCTTATCTGTGCttttgtttccagaaggcagggagtgtgtg aactgtggggcaacctcgaccccactgtggcggcgagatggcacgggaca ctacctgtgcaacgcctgcgggctctatcacaaaatgaacggacagaacc ggcccctcattaagcccaagcgaaggctggTAAGTTCTCGGGAAGGGATG	chr10:8063960+8064159	200	0.57
	GATA3-15	CCTCTCCTCTCTCCCCACTC	GTTCTTGCTGATCCCAGTCC	CCTCTCCTCTCTCCCCACTCtcagtctgcagccaggagagcagggacgtc ctgtgcgaactgtcagaccaccacaaccacactctggaggaggaatgcca atggggaccctgtctgcaatgcctgtgggctctactacaagcttcacaat gtaagtGGACTGGGATCAGCAAGAAC	chr10:8069449+8069624	176	0.5625
	GATA3-16	GAGAGCCTGTGCATTTCAGA	CGGGTTAAACGAGCTGTTCTT	GAGAGCCTGTGCATTTCAGAggcagcaaaaaagtaaaaaaaaaaaaaaaa aattgatctttgtttagattaacagacccctgactatgaagaaggaaggc atccagaccagaaaccgaaaaatgtctagcaaatccaaaaagtgcaaaaa agtgcatgactcactggaggacttccccAAGAACAGCTCGTTTAACCCG	chr10:8073672+8073870	199	0.396985
	GATA3-17	TGCATGACTCACTGGAGGAC	GTGGTGTGGTCCAAAGGACA	TGCATGACTCACTGGAGGACttccccaagaacagctcgtttaacccggcc gccctctccagacacatgtcctccctgagccacatctcgcccttcagcca ctccagccacatgctgaccacgcccacgccgatgcacccgccatccagcc TGTCCTTTGGACCACACCAC	chr10:8073824+8073993	170	0.617647
	GATA3-18	TGTCCTTTGGACCACACCA	TTTGCAAAGTGGCAAACATAA	TGTCCTTTGGACCACACCAcccctccagcatggtcaccgccatgggttag agccctgctcgatgctcacagggcccccagcgagagtccctgcagtccct ttcgacttgcatttttgcaggagcagtatcatgaagcctaaacgcgatgg atatatgtttttgaaggcagaaagcaaaaTTATGTTTGCCACTTTGCAAA	chr10:8073974+8074173	200	0.51
MAP3K1	MAP3K1-1	ACACTGACGACATGGTTCTACAAGAAATGAGAAACGTACCTAATAAAAA	TACGGTAGCAGAGACTTGGTCTTCCAATCAGGAAAGAGTTAGGC	AGAAATGAGAAACGTACCTAATAAAAAaaaatgttgtgaagtttcagagt ggcagaatcacaccaccccgaagagccccttcaccagatggcttctcacc atatagccctgaggaaacaaaccgccgtgttaacaaagtgatgcgggcca gactgtacttactgcagcagataggGCCTAACTCTTTCCTGATTGGA	chr5:56864693+56864889	197	0.461929
	MAP3K1-2	ACACTGACGACATGGTTCTACATAGCCCTGAGGAAACAAACC	TACGGTAGCAGAGACTTGGTCTATACTACTACTAATAAAGTATAAAATGGTGACG	TAGCCCTGAGGAAACAAACCgccgtgttaacaaagtgatgcgggccagac tgtacttactgcagcagatagggcctaactctttcctgattggaggagac agcccagacaataaataccgggtgtttattgggcctcaggtaggattCGT CACCATTTTATACTTTATTAGTAGTAGTAT	chr5:56864796+56864975	180	0.455556
	MAP3K1-3	GAAGTTCTTGTGAACCACAGATG	CCATAACATTGGGTCTGAAGG	GAAGTTCTTGTGAACCACAGATGtattaacctataggttttctttttaac tctttagaactgcagctgtgcacgtggaacattctgtattcatctgctat ttgtgatgctccgggtgtttcaactagaaCCTTCAGACCCAATGTTATGG	chr5:56865283+56865432	150	0.4
	MAP3K1-4	CTGTGCACGTGGAACATTCT	TGCTAACAATTTTACTCTAAGCATTT	CTGTGCACGTGGAACATTCTgtattcatctgctatttgtgatgctccggg tgtttcaactagaaccttcagacccaatgttatggagaaaaactttaaag aattttgaggtagtttttaatAAATGCTTAGAGTAAAATTGTTAGCA	chr5:56865348+56865494	147	0.353741
	MAP3K1-5	ACACTGACGACATGGTTCTACATGCTTAATACTTTTTCTTCCCCTTT	TACGGTAGCAGAGACTTGGTCTGCAACTGTGTTGAGTAAGCATAGG	TGCTTAATACTTTTTCTTCCCCTTTtctatagcataaaggatgaagagga acagatgtgtcctatttgcttgttgggcatgcttgatgaagaaagtctta cagtgtgtgaagacggctgcaggaacaagctgcaccaccactgcatgtca atttgtatgtggctctttttctcCCTATGCTTACTCAACACAGTTGC	chr5:56871878+56872074	197	0.426396
	MAP3K1-6	ACACTGACGACATGGTTCTACATTTTAAGTGTACATAAACTGACCTTCAGA	TACGGTAGCAGAGACTTGGTCTGGTTTGAAGTGATTCATCAATAAAG	TTTTAAGTGTACATAAACTGACCTTCAGAtttttttccttagaaaacatt gagagccatgctggtatatactccttgccacagtttagcggaaagaatca aacttcagagacttctccagccagttgtagacaccatcctagtcaaatgt gcagatgccaataggtaaggCTTTATTGATGAATCACTTCAAACC	chr5:56878938+56879132	195	0.389744
	MAP3K1-7	ACACTGACGACATGGTTCTACAGCCAAGATCCAGGATTGATG	TACGGTAGCAGAGACTTGGTCTACAAGGCTGCTCAGGAACAT	GCCAAGATCCAGGATTGATGttgcttttcctttgtttttagccgcacaag tcagctgtccatatcaacactgttggaactgtgcaaaggccaagcaggag agttggcagttggcagagaaatactaaaagctggtaataacttttcactt aaaaggaatatagcatattttatcATGTTCCTGAGCAGCCTTGT	chr5:56880670+56880863	194	0.412371
	MAP3K1-8	TCATTTATTTTTACTTTCCTTTTTGTAG	TGAGGATAAAATTCAGCAGGAAA	TCATTTATTTTTACTTTCCTTTTTGTAGgatccattggtattggtggtgt tgattatgtcttaaattgtattcttggaaaccaaactgaatcaaacaatt ggcaagaacttcttggccgcctttgtcttatagatagactgttgttggaa TTTCCTGCTGAATTTTATCCTCA	chr5:56881055+56881227	173	0.34104
	MAP3K1-9	TGGCCGCCTTTGTCTTATAG	AGGGAGGGTAGGAAGATACAAG	TGGCCGCCTTTGTCTTATAGatagactgttgttggaatttcctgctgaat tttatcctcatattgtcagtactgatgtttcacaagctgagcctgttgaa atcaggtaatttttcttctgaaaatgtattaCTTGTATCTTCCTACCCTC CCT	chr5:56881168+56881320	153	0.379085
	MAP3K1-10	ACACTGACGACATGGTTCTACAAGAAATGCTGAGTGTTTCCAG	TACGGTAGCAGAGACTTGGTCTTGCACTCAGGGGAACTGT	AGAAATGCTGAGTGTTTCCAGttccactcacttcaccaggatgcgtcgcc gtttgatggctattgcagatgaggtggaaattgccgaagccatccagttg ggcgtagaagacactttggatggtcaacaggacagcttcttgcaggcatc tgttcccaacaactatctggaaaccacagagaACAGTTCCCCTGAGTGCA	chr5:56881714+56881913	200	0.5
	MAP3K1-11	ACACTGACGACATGGTTCTACACCTTTAACAGTAAAAAGATTGCTTTC	TACGGTAGCAGAGACTTGGTCTCAGCCATTAAAGTTCCAGTTCC	CCTTTAACAGTAAAAAGATTGCTTTCgtttaatatgtagacaccagagac tctaccaggacataccaaagcaaaacaaccgtatagagaagacactgaat ggctgaaaggtcaacagataggccttggagcattttcttcttgttatcag gctcaagatgtgGGAACTGGAACTTTAATGGCTG	chr5:56883488+56883671	184	0.407609
	MAP3K1-12	ACACTGACGACATGGTTCTACACCAGGACATACCAAAGCAAAA	TACGGTAGCAGAGACTTGGTCTCTGAACATGCTTCATTTTGTGA	CCAGGACATACCAAAGCAAAAcaaccgtatagagaagacactgaatggct gaaaggtcaacagataggccttggagcattttcttcttgttatcaggctc aagatgtgggaactggaactttaatggctgttaaacaggtaaatatctag tgagcatataaatgaaatgactcaaaTCACAAAATGAAGCATGTTCAG	chr5:56883542+56883739	198	0.388889
	MAP3K1-13	ACACTGACGACATGGTTCTACATGCAAAACTTTGTGAACGTG	TACGGTAGCAGAGACTTGGTCTTGCCATCCATTCAATGAAGA	TGCAAAACTTTGTGAACGTGtttatttgaaacaggtgacttatgtcagaa acacatcttctgagcaagaagaagtagtagaagcactaagagaagagata agaatgatgagccatctgaatcatccaaacatcattaggatgttgggagc cacgtgtgagaagagcaattacaatcTCTTCATTGAATGGATGGCA	chr5:56884630+56884825	196	0.387755
	MAP3K1-14	ACACTGACGACATGGTTCTACATGAGCAAGAAGAAGTAGTAGAAGCA	TACGGTAGCAGAGACTTGGTCTTTGCAGAAAGTTAAATCCACGTA	TGAGCAAGAAGAAGTAGTAGAAGCActaagagaagagataagaatgatga gccatctgaatcatccaaacatcattaggatgttgggagccacgtgtgag aagagcaattacaatctcttcattgaatggatggcaggtatgttaatgtt ttaaattacaaaatagtagTACGTGGATTTAACTTTCTGCAA	chr5:56884690+56884881	192	0.364583
	MAP3K1-15	ACACTGACGACATGGTTCTACATCTGTCTTAAGTTTATGATAATTATTTCTATTG	TACGGTAGCAGAGACTTGGTCTGAAGAATTCTCACCTTTGACATCT	TCTGTCTTAAGTTTATGATAATTATTTCTATTGtcttatagggggatcgg tggctcatttgctgagtaaatatggagccttcaaagaatcagtagttatt aactacactgaacagttactccgtggcctttcgtatctccatgaaaacca aatcattcacagAGATGTCAAAGGTGAGAATTCTTC	chr5:56885891+56886076	186	0.370968
	MAP3K1-16	ACACTGACGACATGGTTCTACAGGCCTTTCGTATCTCCATGA	TACGGTAGCAGAGACTTGGTCTTGCCTTCACCTCCCAAAGTA	GGCCTTTCGTATCTCCATGAaaaccaaatcattcacagagatgtcaaagg tgagaattcttctaattattatctagtgacaataaaaaaattaattttaa aatttggggccaggcacagtggctcacacctgtaatcccagTACTTTGGG AGGTGAAGGCA	chr5:56886015+56886175	161	0.385093
	MAP3K1-17	ACACTGACGACATGGTTCTACACAAGGTCATTTGCTGTGTTTG	TACGGTAGCAGAGACTTGGTCTTCACACTCAAAGATGCTTCTCA	CAAGGTCATTTGCTGTGTTTGttgacaggtgccaatttgctaattgacag cactggtcagagactaagaattgcagattttggagctgcagccaggttgg catcaaaaggaactggtgcaggagagtttcagggacaattactggggaca attgcatttatggcacctgaggTGAGAAGCATCTTTGAGTGTGA	chr5:56887350+56887543	194	0.458763
	MAP3K1-18	ACACTGACGACATGGTTCTACAGAGTCCTATTTCCAAATTAACTCTGATT	TACGGTAGCAGAGACTTGGTCTGCACAAAGAAGTAATTTTTATCTCACA	GAGTCCTATTTCCAAATTAACTCTGATTtattttaggtactaagaggtca acagtatggaaggagctgtgatgtatggagtgttggctgtgctattatag aaatggcttgtgcaaaaccaccatggaatgcagaaaaacactccaatcat cttgctttgatatttaaggtaatTGTGAGATAAAAATTACTTCTTTGTGC	chr5:56888190+56888389	200	0.36
	MAP3K1-19	ACACTGACGACATGGTTCTACAAACACTGGCTTTTTCTCCACA	TACGGTAGCAGAGACTTGGTCTTTCTACTGTAGTTGATCTGCATAATTG	AACACTGGCTTTTTCTCCACAgattgctagtgcaactactgctccatcga tcccttcacatttgtctcctggtttacgagatgtggctcttcgttgttta gaacttcaacctcaggacagacctccatcaagagagctactgaagcatcc agtctttcgtactacatggtagcCAATTATGCAGATCAACTACAGT	chr5:56893509+56893704	196	0.44898
	MAP3K1-20	GTAGCCCGCGAGAGAAAAT	GCCTCCCGCAGCAGT	GTAGCCCGCGAGAGAAAATggcggcggcggcggggaatcgcgcctcgtcg tcgggattcccgggcgccagggctacgagccctgaggcaggcggcggcgg aggagccctcaaggcgagcagcgcgcccgcggctgccgcgggACTGCTGC GGGAGGC	chr5:56815557+56815713	157	0.764331
	MAP3K1-21	ACACTGACGACATGGTTCTACACCCTCAAGGCGAGCAG	TACGGTAGCAGAGACTTGGTCTGACGGGGAAGTCGAGGAG	CCCTCAAGGCGAGCAGcgcgcccgcggctgccgcgggactgctgcgggag gcgggcagcgggggccgcgagcgggcggactggcggcggcggcagctgcg caaagtgcggagtgtggagctggaccagctgcctgagcagccgctcttcc ttgccgcctcaccgccggcCTCCTCGACTTCCCCGTC	chr5:56815662+56815848	187	0.764706
	MAP3K1-22	ACACTGACGACATGGTTCTACACTGGACCAGCTGCCTGAG	TACGGTAGCAGAGACTTGGTCTGAGGCGCCGCTGTCC	CTGGACCAGCTGCCTGAGcagccgctcttccttgccgcctcaccgccggc ctcctcgacttccccgtcgccggagcccgcggacgcagcggggagtggga ccggcttccagcctgtggcggtgccgccgccccacggagccgcgagccgc ggcggcgcccaccttaccgagtcggtggcggcgccGGACAGCGGCGCCTC	chr5:56815781+56815980	200	0.775
	MAP3K1-23	CGCCCACCTTACCGAGT	CCCGCTCTCCAAGTCC	CGCCCACCTTACCGAGTcggtggcggcgccggacagcggcgcctcgagtc ccgcagcggccgagcccggggagaagcgggcgcccgccgccgagccgtct cctgcagcggcccccgccgggtgagcagcacggccggggtcgcggcggGG ACTTGGAGAGCGGG	chr5:56815936+56816099	164	0.804878
	MAP3K1-24	ACACTGACGACATGGTTCTACATTCCTAGTCTATGATATTTACATTTACTTACCT	TACGGTAGCAGAGACTTGGTCTGCCTTTGGAAGCTGGTGA	TTCCTAGTCTATGATATTTACATTTACTTACCTtttatatttttaagtaa tcaaaatattggaatactttgattcaggtggtaaaaccaatcccagttaa aggagatggatctgaaatgaatcacttagcagctgagtctccaggagagg tccaggcaagtgcggctTCACCAGCTTCCAAAGGC	chr5:56859638+56859822	185	0.383784
	MAP3K1-25	GGAGAGGTCCAGGCAAGTG	AAAAACTAACATATTTGTTGTAACATTAAC	GGAGAGGTCCAGGCAAGTGcggcttcaccagcttccaaaggccgacgcag tccttctcctggcaactccccatcaggtcgcacagtgaaatcagaatctc caggagtaaggagaaaaagagtttccccagtgcctgtaaGTTAATGTTAC AACAAATATGTTAGTTTTT	chr5:56859781+56859949	169	0.485207
	MAP3K1-26	CATTTCTCATTTTATTTGTTTCTGC	TTCTCCTTTCCAACCATTCG	CATTTCTCATTTTATTTGTTTCTGCctgcattttagtcgtgagatggaga ataaagaaactctcaaagggttgcacaagatggatgatcgtccagaggaa cgaatgatcagggagaaactgaaggcaacctgtatgccagcctggaagca CGAATGGTTGGAAAGGAGAA	chr5:56856564+56856733	170	0.435294
	MAP3K1-27	ATCGTCCAGAGGAACGAATG	TTCCATTTCCTCCTATGCTTTC	ATCGTCCAGAGGAACGAATGatcagggagaaactgaaggcaacctgtatg ccagcctggaagcacgaatggttggaaaggagaaataggcgagggcctgt ggtaagtggctatgggttaccagttataaggaaGAAAGCATAGGAGGAAA TGGAA	chr5:56856650+56856804	155	0.483871
	MAP3K1-28	ACACTGACGACATGGTTCTACATCATTGTTACTGTCTTTTTCCAATG	TACGGTAGCAGAGACTTGGTCTTCCTTAAAAAGTACTAACCTGTTTTCTG	TCATTGTTACTGTCTTTTTCCAATGttaggttgagagtttgttccagaaa tatcacagtaggcgtagctcaaggatcaaagctccatctcgtaacaccat ccagaagtttgtttcacgcatgtcaaattctcatacattgtcatcatcta gtacttctacgtctagttCAGAAAACAGGTTAGTACTTTTTAAGGA	chr5:56865800+56865995	196	0.377551
	MAP3K1-29	GCTCAAGGATCAAAGCTCCA	AACACTGGATTAATGTTTGAAATCC	GCTCAAGGATCAAAGCTCCAtctcgtaacaccatccagaagtttgtttca cgcatgtcaaattctcatacattgtcatcatctagtacttctacgtctag ttcagaaaacaggttagtactttttaaGGATTTCAAACATTAATCCAGTG TT	chr5:56865866+56866017	152	0.368421
	MAP3K1-30	ACACTGACGACATGGTTCTACATTTACATTTTTGTAAGATTTTGTTTCTG	TACGGTAGCAGAGACTTGGTCTAAAAATTAAGACAAACCACACTGAGA	TTTACATTTTTGTAAGATTTTGTTTCTGtaatttttcaggggcagaagag tgtagaagaaatagagaacctttaatatgtcccctttgtagatctaagtg gagatctcatgatttctacaggtaataattttgaaatgatacggatatgt ttaatttttaaaaattTCTCAGTGTGGTTTGTCTTAATTTTT	chr5:56872602+56872793	192	0.286458
	MAP3K1-31	ACACTGACGACATGGTTCTACACAAGTTTTGTTATTTTTCATTTTAGCC	TACGGTAGCAGAGACTTGGTCTCCATGGCTCAGCTAAATCTT	CAAGTTTTGTTATTTTTCATTTTAGCCacgagttgtcaagtcctgtggat tccccttcttccctcagagctgcacagcagcaaaccgtacagcagcagcc tttggctggatcacgaaggaatcaagagagcaattttaaccttactcatt atggaactcagcaaatccctcctgcttacaAAGATTTAGCTGAGCCATGG	chr5:56872800+56872999	200	0.45
	MAP3K1-32	ACACTGACGACATGGTTCTACAGATTCCCCTTCTTCCCTCAG	TACGGTAGCAGAGACTTGGTCTTTTCTTTGAGAAATGAAAAACAAAGA	GATTCCCCTTCTTCCCTCAGagctgcacagcagcaaaccgtacagcagca gcctttggctggatcacgaaggaatcaagagagcaattttaaccttactc attatggaactcagcaaatccctcctgcttacaaagatttagctgagcca tggattcaggtaagtagtTCTTTGTTTTTCATTTCTCAAAGAAA	chr5:56872847+56873040	194	0.43299
	MAP3K1-33	ACACTGACGACATGGTTCTACATGAATTCATCGTGTGTGTTTGA	TACGGTAGCAGAGACTTGGTCTGGTGGCTCCCCCACTC	TGAATTCATCGTGTGTGTTTGAtacaggtgtttggaatggaactcgttgg ctgcttattttctagaaactggaatgtgagagagatggccctcaggcgtc tttcccatgatgtcagtggggccctgctgttggcaaatggggagagcact ggaaattctgggggcagcagtggaagcagcccGAGTGGGGGAGCCACC	chr5:56875005+56875202	198	0.530303
	MAP3K1-34	ACACTGACGACATGGTTCTACAAATTCTGGGGGCAGCAGT	TACGGTAGCAGAGACTTGGTCTAAACCCCAAACCCATAATGA	AATTCTGGGGGCAGCAGTggaagcagcccgagtgggggagccaccagtgg gtcttcccagaccagtatctcaggagatgtggtggaggcatgctgcagcg ttctgtcaatggtctgtgctgaccctgtctacaaagtgtacgttgctgct ttagtaagtagctttattccataatcataTCATTATGGGTTTGGGGTTT	chr5:56875158+56875356	199	0.507538
	MAP3K1-35	ACACTGACGACATGGTTCTACATGGAACTTATATGGTAATGAATGTTTTT	TACGGTAGCAGAGACTTGGTCTGGAAACACTCAGCATTTCTAACA	TGGAACTTATATGGTAATGAATGTTTTTttctttcaggtataagaagctg ctgtccctcttaacctttgctttgcagtccattgataattcccactcaat ggttggcaaactttccagaaggatctacttgagttctgcaagaatggtta ctacagtaccccatgtgttttcaaaacTGTTAGAAATGCTGAGTGTTTCC	chr5:56881533+56881732	200	0.385
	MAP3K1-36	ACACTGACGACATGGTTCTACAAGTTCCCCTGAGTGCACAGT	TACGGTAGCAGAGACTTGGTCTGGGTCTGCCTTTTGTTTGAA	AGTTCCCCTGAGTGCACAGTccatttagagaaaactggaaaaggattatg tgctacaaaattgagtgccagttcagaggacatttctgagagactggcca gcatttcagtaggaccttctagttcaacaacaacaacaacaacaacaaca gagcaaccaaagccaatggTTCAAACAAAAGGCAGACCC	chr5:56881898+56882086	189	0.433862
	MAP3K1-37	ACACTGACGACATGGTTCTACACAACAACAACAGAGCAACCAA	TACGGTAGCAGAGACTTGGTCTGGGAATGAATCCCTGAAGTCT	CAACAACAACAGAGCAACCAAagccaatggttcaaacaaaaggcagaccc cacagtcagtgtttgaactcctctcctttatctcatcattcccaattaat gtttccagccttgtcaaccccttcttcttctaccccatctgtaccagctg gcactgcaacagatgtctctaagcatAGACTTCAGGGATTCATTCCC	chr5:56882037+56882233	197	0.456853
	MAP3K1-38	ACACTGACGACATGGTTCTACACTGGCACTGCAACAGATGTC	TACGGTAGCAGAGACTTGGTCTTGGCCTGTGTATGTTACTGGA	CTGGCACTGCAACAGATGTCtctaagcatagacttcagggattcattccc tgcagaataccttctgcatctcctcaaacacagcgcaagttttctctaca attccacagaaactgtcctgaaaacaaagactcagataaactttccccag tctttactcagtcaagacccttgcccTCCAGTAACATACACAGGCCA	chr5:56882184+56882380	197	0.451777
	MAP3K1-39	ACACTGACGACATGGTTCTACATCAGATAAACTTTCCCCAGTCTTT	TACGGTAGCAGAGACTTGGTCTATTGCTGCTACAGCCAAAGC	TCAGATAAACTTTCCCCAGTCTTTactcagtcaagacccttgccctccag taacatacacaggccaaagccatctagacctaccccaggtaatacaagta aacagggagatccctcaaaaaatagcatgacacttgatctgaacagtagt tccaaatgtgatgacaGCTTTGGCTGTAGCAGCAAT	chr5:56882315+56882500	186	0.44086
	MAP3K1-40	ACACTGACGACATGGTTCTACATGTCCTGAAAACAAAGACTCAGA	TACGGTAGCAGAGACTTGGTCTGCTACAGCCAAAGCTGTCAT	TGTCCTGAAAACAAAGACTCAGAtaaactttccccagtctttactcagtc aagacccttgccctccagtaacatacacaggccaaagccatctagaccta ccccaggtaatacaagtaaacagggagatccctcaaaaaatagcatgaca cttgatctgaacagtagttccaaatgtgATGACAGCTTTGGCTGTAGC	chr5:56882297+56882494	198	0.439394
	MAP3K1-41	ACACTGACGACATGGTTCTACAAACAGGGAGATCCCTCAAAAA	TACGGTAGCAGAGACTTGGTCTTGCTTCAAGAAGGTCCTCAA	AACAGGGAGATCCCTCAAAAAatagcatgacacttgatctgaacagtagt tccaaatgtgatgacagctttggctgtagcagcaatagtagtaatgctgt tatacccagtgacgagacagtgttcaccccagtagaggagaaatgcagat tagatgtcaatacagagctcaactccagtaTTGAGGACCTTCTTGAAGCA	chr5:56882415+56882614	200	0.43
	MAP3K1-42	ACACTGACGACATGGTTCTACATGTCAATACAGAGCTCAACTCCA	TACGGTAGCAGAGACTTGGTCTAAAGCTTCTTCTTCTTCAGCTT	TGTCAATACAGAGCTCAACTCCAgtattgaggaccttcttgaagcatcta tgccttcaagtgatacaacagtaacttttaagtcagaagttgctgtcctg tctcctgaaaaggctgaaaatgatgatacctacaaagatgatgtgaatca taatcaaaagtgcaaagagaagatggAAGCTGAAGAAGAAGAAGCTTT	chr5:56882569+56882766	198	0.383838
	MAP3K1-43	ACACTGACGACATGGTTCTACATGTGAATCATAATCAAAAGTGCAA	TACGGTAGCAGAGACTTGGTCTGCCCCAAGGAAGTTTTCTAA	TGTGAATCATAATCAAAAGTGCAAagagaagatggaagctgaagaagaag aagctttagcaattgccatggcaatgtcagcgtctcaggatgccctcccc atagttcctcagctgcaggttgaaaatggagaagatatcatcattattca acaggatgtaagtatagattctttaagaggTTAGAAAACTTCCTTGGGGC	chr5:56882710+56882909	200	0.41
NCOR1	NCOR1-1	CCTCTCTTCGTGTCTCACCA	TTTGCTGATCCTGCCAGTAA	CCTCTCTTCGTGTCTCACCActggtcacaactgaggtgttggcagtacca ggcactactcccataggctgggacatgacaactccatgatcctcaacttt gtcatcaaagcttcccatgagagccttcctgataatgtcttccagcccaa gaTTACTGGCAGGATCAGCAAA	chr17:16039457+16039628	172	0.5
	NCOR1-2	ACTGCTGCTGACCTGCTTCTCA	GCCTGCCAGCCTCCCGTTAC	ACTGCTGCTGACCTGCTTCTCAaattttcttctaacctggcagcttcatg cttactctcttttgttttggacacatccatctggggtgcagaagctgcag catccacaagagcagccagggcatccgcagcagtgttGTAACGGGAGGCT GGCAGGC	chr17:16061703+16061859	157	0.528662
	NCOR1-3	GGGCCCTGACCAACAGACCCT	GCATCTACGTTTGTAGCATCACAGCCA	GGGCCCTGACCAACAGACCCTcaggttgtgagttttggcttcggggagaa aattcttcctgcttgatgtagggcaaagtagctgtggaaaggcagagaaa catgaaacaatccagtactaaattacTGGCTGTGATGCTACAAACGTAGA TGC	chr17:16080429+16080581	153	0.470588
	NCOR1-4	TTTTGAGATACCTTCGCTGTCTT	TCTTTCCTCCTTTAGACTTCACG	TTTTGAGATACCTTCGCTGTCTTctggattttcttcttcattggaggctt caatatcttcatcctcctgagcagaaacagtggaagcgacactttcacat tgagacacatctcgctcttcacgaggttttCGTGAAGTCTAAAGGAGGAA AGA	chr17:16108775+16108927	153	0.431373
	NCOR1-5	GGAGTCTTCTTTTTCATCTTTTTCC	TGATGGTTCATTCTAGCAGCA	GGAGTCTTCTTTTTCATCTTTTTCCtcttcatctttcttttcttcttctt ttttttctgttttttctgctttatcctcttctttttcttctactttttct tcttgcgagggtcgagcaattTGCTGCTAGAATGAACCATCA	chr17:16126084+16126225	142	0.34507
	NCOR1-6	ATTTTCTTACCTCCTGCTCAGAGAGCC	ATTTCTCCCTCATGTTTAGAGTTGGGC	ATTTTCTTACCTCCTGCTCAGAGAGCCcatcaataatttcagaaatctca tgctcactcctagcaatggtggctgaaagaccagctcccctctGCCCAAC TCTAAACATGAGGGAGAAAT	chr17:16143596+16143715	120	0.458333
	NCOR1-7	TCGAATTTCTGGAAACTGCTTT	TTTGCTACGGATATTTAATAGGAACA	TCGAATTTCTGGAAACTGCTTTtcatagtattcccttgttttgctttctt tagctttcctccgaggattattttctattctgtccacttttttctcccat gcctccatgagctgatcataacgctggcagatttttTGTTCCTATTAAAT ATCCGTAGCAAA	chr17:16146408+16146569	162	0.376543
	NCOR1-8	GAGCAGTCACTCCCCTGGTA	CACATCTTAATTAACTTGAATGTTTGC	GAGCAGTCACTCCCCTGGTAtacagttggtactcagtacatatttgttgg actgactactgctgtgccaattttgtattggtaaataatgtcttttcaat cttacctgacgtagtaactgctggcagattaaagatctcagttcctggct gagcagctgctatatttaaGCAAACATTCAAGTTAATTAAGATGTG	chr17:16040336+16040531	196	0.392857
	NCOR1-9	TCTGGAGAGACCCTTGAACCTGGTC	CTCGCAGACTCCCCAGCAGC	TCTGGAGAGACCCTTGAACCTGGTCtttgatgatggacagactgagcctg ggattctgggctgtaacggtttgatgttttagtcctcacaggtgtagata ccaaagcagaaggtgagttctggaatgtagaagtaggagGCTGCTGGGGA GTCTGCGAG	chr17:16057541+16057699	159	0.503145
	NCOR1-10	TCCACCTCCAGGGTTTTCTGCTCT	GCTGCAGCTTCTGCACCCCA	TCCACCTCCAGGGTTTTCTGCTCTagctgctgctgttcactaactgctgc tgacctgcttctcaaattttcttctaacctggcagcttcatgcttactct cttttgttttggacacatccatcTGGGGTGCAGAAGCTGCAGC	chr17:16061661+16061803	143	0.48951
	NCOR1-11	TGGGCAGAAAAGCATGACTA	TTCCAAGGAACCAATGGAAC	TGGGCAGAAAAGCATGACTAtacttagactattgcagtcacaaattttaa aatgtatatgcaagagacattttttgtcaaaatatgtacaagagactgac atgattcgtagctgagcagttggatccaaaggtgtgattacactgGTTCC ATTGGTTCCTTGGAA	chr17:16062005+16062169	165	0.369697
	NCOR1-12	GGTCCTCCGTGCACTGGTGTCAT	CCGCTGGAAATTGTGCCAGAGAACA	GGTCCTCCGTGCACTGGTGTCATcataaatcccagggctcagttgtgctt tgggagcttcatgcagtgtggacctaagaacggaggggccagagcttacc actgacgtgtgccgggaacgcacggtctcgcctgctttcacatcctcata ttttccccgttctaccacttttaTGTTCTCTGGCACAATTTCCAGCGG	chr17:16070226+16070423	198	0.540404
	NCOR1-13	TCGTTTCACCTGTGAGATGGAGCCT	AGGCGTTCGGCTTCCGACAA	TCGTTTCACCTGTGAGATGGAGCCTcccattataaaagatggtttttctg aagccactgtggttttggatgacgggatgagagggggcggtggcctggtt ggtcgagTTGTCGGAAGCCGAACGCCT	chr17:16086273+16086399	127	0.535433
	NCOR1-14	GTTTTGGATGACGGGATGAG	CAGGAATGACTGAGAGAGGTAACA	GTTTTGGATGACGGGATGAGagggggcggtggcctggttggtcgagttgt cggaagccgaacgccttcagggagattagttatcacttgatgtggagcag gctgaaggacttttaaaaggaaagaaaaatgattttaaactagtccattt cctagtttacaacaTGTTACCTCTCTCAGTCATTCCTG	chr17:16086334+16086521	188	0.457447
	NCOR1-15	CCACAGGAGGAGGGGACACGG	TGCTGGGTGTGGTGTGCAGC	CCACAGGAGGAGGGGACACGGgcttctcaggctcaggaggtttagctgcc tcttcttcaagctgttgctaagagatccagaaagaaagagtcaagcatgt GCTGCACACCACACCCAGCA	chr17:16158807+16158926	120	0.541667
	NCOR1-16	CAAACCTACAACTCTACAGGGTAAGA	ACCACGTCTGGAACAGGTTT	CAAACCTACAACTCTACAGGGTAAGAgaacaaatatttaccttcttagca tctgcagaagccctcagcccttctggcagcgggtgcactaaaggcaaaac cgcagcactgacacgctgaaaatgagaatcagAAACCTGTTCCAGACGTG GT	chr17:16171763+16171914	152	0.480263
	NCOR1-17	GGTGCACTAAAGGCAAAACC	TTAGGCCTCAAGAAAGGAGAAC	GGTGCACTAAAGGCAAAACCgcagcactgacacgctgaaaatgagaatca gaaacctgttccagacgtggtcgcttcgattccagtgaatcatgatccac tggggatgggcctggatgaaacggttcataactaGTTCTCCTTTCTTGAG GCCTAA	chr17:16171844+16171999	156	0.487179
PTEN	PTEN-1	GCAACAGATAACTCAGATTGCCTT	GTTTCCTCTGGTCCTGGTATGA	GCAACAGATAACTCAGATTGCCTTataatagtctttgtgtttacctttat tcagaatatcaaatgatagtttattttgttgactttttgcaaatgtttaa cataggtgacagattttcttttttaaaaaaataaaacatcattaattaaa tatgtcatttcatttctttttcttttctttttttttttttttaggacaaa atgtttcacttttgggtaaatacattctTCATACCAGGACCAGAGGAAAC	chr10:87960700+87960949	250	0.256
	PTEN-2	ACACTGACGACATGGTTCTACAAGGACAAAATGTTTCACTTTTGGGTAA	TACGGTAGCAGAGACTTGGTCTACTAGATATTCCTTGTCATTATCTGCAC	AGGACAAAATGTTTCACTTTTGGGTAAatacattcttcataccaggacca gaggaaacctcagaaaaagtagaaaatggaagtctatgtgatcaagaaat cgatagcatttgcagtatagagcGTGCAGATAATGACAAGGAATATCTAG T	chr10:87960892+87961042	151	0.364238
	PTEN-3	CCTCAGAAAAAgTAGAAAATGGAAGTC	ACAAGTCAaCAACCCCCACA	CCTCAGAAAAAGTAGAAAATGGAAGTCtatgtgatcaagaaatcgatagc atttgcagtatagagcgtgcagataatgacaaggaatatctagtacttac tttaacaaaaaatgatcttgacaaagcaaataaagacaaagccaaccgat acttttctccaaattttaaggtcagttaaattaaacatttTGTGGGGGTT GTTGACTTGT	chr10:87960949+87961158	210	0.333333
	PTEN-4	TGACAGTTTGACAGTTAAAGGCAT	CACACACAGGTAACGGCTGA	TGACAGTTTGACAGTTAAAGGCATttcctgtgaaataatactggtatgta tttaaccatgcagatcctcagtttgtggtctgccagctaaaggtgaagat atattcctccaattcaggacccacacgacgggaagacaagttcatgtact ttgagttcccTCAGCCGTTACCTGTGTGTG	chr10:87957790+87957969	180	0.433333
	PTEN-5	TGTGGTCTGCCAGCTAAAGG	TCTCCCAATGAAAGTAAAGTACAAACC	TGTGGTCTGCCAGCTAAAGGtgaagatatattcctccaattcaggaccca cacgacgggaagacaagttcatgtactttgagttccctcagccgttacct gtgtgtggtgatatcaaagtagagttcttccacaaacagaacaagatgct aaaaaaGGTTTGTACTTTACTTTCATTGGGAGA	chr10:87957863+87958045	183	0.42623
	PTEN-6	TCCACAAACAGAACAAGATGCT	GGCCTTTTCCTTCAAACAGGATT	TCCACAAACAGAACAAGATGCTaaaaaaggtttgtactttactttcattg ggagaaatatccaaaataaggacagattaaaagctatattttattttatg acatgtaaggaactataatttgttttctattagatctgcaggtgttttgc ttactctggcattggtgagacattataagggtaaatAATCCTGTTTGAAG GAAAAGGCC	chr10:87957991+87958199	209	0.320574
	PTEN-7	TCTTAAATGGCTACGACCCAG	TCCAGATGATTCTTTAACAGGTAGC	TCTTAAATGGCTACGACCCAGttaccatagcaatttagtgaaataactat aatggaacattttttttcaatttggcttctcttttttttctgtccaccag ggagtaactattcccagtcagaggcgctatgtgtattattataGCTACCT GTTAAAGAATCATCTGGA	chr10:87952018+87952185	168	0.357143
	PTEN-8	CAGTCAGAGGCGCTATGTGT	TCTAGATATGGTTAAGAAAACTGTTCCA	CAGTCAGAGGCGCTATGTGTattattatagctacctgttaaagaatcatc tggattatagaccagtggcactgttgtttcacaagatgatgtttgaaact attccaatgttcagtggcggaacttgcagtaagtgcttgaaattctcatc cttccatgtatTGGAACAGTTTTCTTAACCATATCTAGA	chr10:87952132+87952320	189	0.380952
	PTEN-9	ttCTTATTCTGAGGTTATCTTTTTACCAC	TCATTACACCAGTTCGTCCCT	TTCTTATTCTGAGGTTATCTTTTTACCACagttgcacaatatccttttga agaccataacccaccacagctagaacttatcaaacccttttgtgaagatc ttgaccaatggctaagtgaagatgacaatcatgttgcagcaattcactgt aaagctggaaAGGGACGAACTGGTGTAATGA	chr10:87932982+87933162	181	0.392265
	PTEN-10	TGACCAATGGCTAAGTGAAGATGA	TCCAGGAAGAGGAAAGGAAAAACA	TGACCAATGGCTAAGTGAAGATGAcaatcatgttgcagcaattcactgta aagctggaaagggacgaactggtgtaatgatatgtgcatatttattacat cggggcaaatttttaaaggcacaagaggccctagatttctatggggaagt aaggaccagagacaaaaaggtaagttattttttgaTGTTTTTCCTTTCCT CTTCCTGGA	chr10:87933083+87933291	209	0.392344
	PTEN-11	TATATCACTTTTAAACTTTTCTTTTAGTTGTGC	CTCGATAATCTGGATGACTCATTATTGTT	TATATCACTTTTAAACTTTTCTTTTAGTTGTGCtgaaagacattatgaca ccgccaaatttaattgcagaggtaggtatgaatgtactgtactatgttgt ataacttaaacccgatagactgtatcttactgtcatAACAATAATGAGTC ATCCAGATTATCGAG	chr10:87931019+87931183	165	0.327273
	PTEN-12	AATCTGTCTTTTGGTTTTTCTTGATAGT	AATAGTTGTTTTAGAAGATATTTGCAAGC	AATCTGTCTTTTGGTTTTTCTTGATAGTattaatgtaatttcaaatgtta gctcatttttgttaatggtggctttttgtttgtttgttttgttttaaggt ttttggattcaaagcataaaaaccattacaagatatacaatctgtaagta tgttttcttatttgtatGCTTGCAAATATCTTCTAAAACAACTATT	chr10:87925415+87925610	196	0.255102
	PTEN-13	TGCTGCATATTTCAGATATTTCTTTCCTTA	ATGAAAACACAACATGAATATAAACATCAAT	TGCTGCATATTTCAGATATTTCTTTCCTTAactaaagtactcagatattt atccaaacattattgctatgggatttcctgcagaaagacttgaaggcgta tacaggaacaatattgatgatgtagtaaggtaagaatgctttgattttct atttcaaatATTGATGTTTATATTCATGTTGTGTTTTCAT	chr10:87893981+87894170	190	0.3
	PTEN-14	AGATGAGTcATATTTGTGGGTTTTCA	TCTGGATCAGAGTCAGTGGT	AGATGAGTCATATTTGTGGGTTTTCAttttaaattttctttctctaggtg aagctgtacttcacaaaaacagtagaggagccgtcaaatccagaggctag cagttcaacttctgtaacaccagatgttagtgacaatgaacctgatcatt atagatattctgacACCACTGACTCTGATCCAGA	chr10:87965240+87965423	184	0.38587
	PTEN-15	ACACTGACGACATGGTTCTACAGTAGAGGAGCCGTCAAATCCA	TACGGTAGCAGAGACTTGGTCTTTCATGGTGTTTTATCCCTCTTGA	GTAGAGGAGCCGTCAAATCCAgaggctagcagttcaacttctgtaacacc agatgttagtgacaatgaacctgatcattatagatattctgacaccactg actctgatccagagaatgaaccttttgatgaagatcagcatacacaaatt acaaaagtctgaatttttttttaTCAAGAGGGATAAAACACCATGAA	chr10:87965311+87965507	197	0.375635
	PTEN-16	GCAGCTTCTGCCATCTCTCT	TCCGTCTACTCCCACGTTCT	GCAGCTTCTGCCATCTCTCTcctcctttttcttcagccacaggctcccag acatgacagccatcatcaaagagatcgttagcagaaacaaaaggagatat caagaggatggattcgacttagacttgacctgtatccatttctgcggctg ctcctctttacctttctgtcactctcttAGAACGTGGGAGTAGACGGA	chr10:87864418+87864615	198	0.474747
NF1	NF1-1	TCCTCTAAAATGTTCCTCTGTTGA	GGTGGGGATTCTTCATGGTA	TCCTCTAAAATGTTCCTCTGTTGActttttttttcttttaggcataattt gttggactctaagatcaacaccctgttatcattgtgccaagatccaaatt tgttaaatccaatccatggaattgtgcagagtgtggtgTACCATGAAGAA TCCCCACC	chr17:31358439+31358596	158	0.379747
	NF1-2	TCTTGATGCCTTGATTGACACGTACC	CCTGGGGAATGCTGGGAAGTTGC	TCTTGATGCCTTGATTGACACGTACCtgcctggaattgatgaagaaacca gtgaagaatccctcctgactcccacatctccttaccctcctgcactgcag agccagcttagtatcactgccaaccttaacctttctaattccatgacctc acttGCAACTTCCCAGCATTCCCCAGG	chr17:31360528+31360704	177	0.491525
	NF1-3	CTGTGTGAACCTCATCAACCA	TGTCCAACCAATGCAAAGTT	CTGTGTGAACCTCATCAACCAtctcatgattatctttaatagagtccaga ggaagtatttatggcaatccggaatcctctggagtggcactgcaagcaaa tggatcattttgttggactcaatttcaactctaactttAACTTTGCATTG GTTGGACA	chr17:31342967+31343124	158	0.398734
	NF1-4	TCCTGGATCCTTTATTACGAATTG	GAGAAGGTGCCTTGCTTCAT	TCCTGGATCCTTTATTACGAATTGtgatcacatcctctgattggcaacat gttagctttgaagtggatcctaccaggtttgtcatcttttcacatagaac cgctgttttttgtttttttttttttgtttgtttgttttactaacactgcA TGAAGCAAGGCACCTTCTC	chr17:31235946+31236114	169	0.372781
	NF1-5	TGGGATTGTTTGCACTAACCT	GCATGGAGTCTGCCAATTCT	TGGGATTGTTTGCACTAACCTgattttgttttgttctcaggatgaactag ctcgagttctggttactctgtttgattctcggcatttactctaccaactg ctctggaacatgttttctaaagaagtAGAATTGGCAGACTCCATGC	chr17:31235571+31235716	146	0.410959
	NF1-6	CGTTTCCCTCAGAACAGCAT	TTGGAAGGGGAATTTAAGATAGC	CGTTTCCCTCAGAACAGCATcggtgcagtaggaagtgccatgttcctcag atttatcaatcctgccattgtctcaccgtatgaagcagggattttagata aaaagccaccacctagaatcgaaaggggcttgaagttaatgtcaaaggtg aattattttgataatctaGCTATCTTAAATTCCCCTTCCAA	chr17:31258356+31258546	191	0.413613
	NF1-7	TTTGTGTTTTCTCCTAGGTCAGC	CTAACGTGAGGTGTGGCTCA	TTTGTGTTTTCTCCTAGGTCAGCtgcctataatcttctgtgtgccttaac ttgtacctttaatttaaaaatcgagggccagttactagagacatcaggtt tatgtatccctgccaacaacaccctctttattgtctctattagtaagaca ctggcagccaaTGAGCCACACCTCACGTTAG	chr17:31330279+31330459	181	0.41989
	NF1-8	TCTGGACAGTCTACGAAAAGCTC	CTTAAGATCAACCACCATGGACT	TCTGGACAGTCTACGAAAAGCTCttgctggccatggaggaagtaggcagc tgacagaaagtgctgcaattgcctgtgtcaaactgtgtaaagcaagtact tacatcaattgggaagataactctgtcattttcctacttgttcAGTCCAT GGTGGTTGATCTTAAG	chr17:31200430+31200595	166	0.439759
	NF1-9	CTTGGCCTCCTGAAGTGCT	AATTTTGCACAATCCACATTGA	CTTGGCCTCCTGAAGTGCTgggattacaggtgtgagataccacacctgtc ccctaatacttaatttgataagttaattttggtttttactttttaggtta caggaattaactgtttgttcagaagacaatgttgatgttcatgatataga attgttacagtataTCAATGTGGATTGTGCAAAATT	chr17:31169795+31169980	186	0.344086
KMT2D	KMT2D-1	CAGGGAGCTTGGTGAGCAGCC	GGTCCGGAAACAGCAGAAGGAGC	CAGGGAGCTTGGTGAGCAGCCggggactctgggaagggctgagagccagc acagctgagtgctgttgctgttgttgctgctgctgctgctgttgttgctg ctgcttgttccgatattctgccatgagattagtgtGCTCCTTCTGCTGTT TCCGGACC	chr12:49033808+49033965	158	0.56962
	KMT2D-2	TGCACTTCCAGCCGCCCTTG	GGGCTGGCGTTGTGTGGAGT	TGCACTTCCAGCCGCCCTTGgggacggtgagcagtggggggtccaggcag tatgtgtggtagctaatatcacagtcatcacagagcagcaggcgtgaggg gtcggaggcctggccacacacctcacacacaatacACTCCACACAACGCC AGCCC	chr12:49046613+49046767	155	0.606452
	KMT2D-3	GCGTCTCAAGTGCAGGAGATGGG	TCCCGGCCGCTGGAGGAATC	GCGTCTCAAGTGCAGGAGATGGGggtgactcttccggtggagacaagggc gactcctccagtggagaaaaaggtgatgattcaggtgggggagacagagg agactcctcaggcggcggagagaggggcGATTCCTCCAGCGGCCGGGA	chr12:49052080+49052227	148	0.621622
	KMT2D-4	CTGCACCTTCCTCCCACGCC	TGCCACTGGGCCACCCTTCT	CTGCACCTTCCTCCCACGCCccatactcactgatcactccctgagcaaaa gtgggcgggttgggacgaggctgggagggatcaccagcactccgctcctg caatgagagaggctgctaaagggtcattgttccctgctaggccctaAGAA GGGTGGCCCAGTGGCA	chr12:49034380+49034545	166	0.60241
	KMT2D-5	AGGGGTGAAAGGAGGAGGAGCTG	GTGCCCCTAACTGTGTGGCCG	AGGGGTGAAAGGAGGAGGAGCTGctttgtcactcagtcaggatacttcct ctcacctcctctcctttggggattcgccggctggagatgatgatgatttt gtcctctttgtcaaatgtcacgacttCGGCCACACAGTTAGGGGCAC	chr12:49021988+49022134	147	0.52381
ATM	ATM-1	TCACTGGATCGCTGTCTTCTGGGA	AGCCTCCCACCATCCTTGCTGT	TCACTGGATCGCTGTCTTCTGGGAttatcagaacagcttctgaataatta ctcatctgaggtgagattttttaaaaaaagaactaagcttatatatgatt caactttggtaaactgttaggaaggagaaataggggcaggaaaaACAGCA AGGATGGTGGGAGGCT	chr11:108253980+108254145	166	0.385542
	ATM-2	TTGGTTACATACTTGGACTTGGTG	TTGGTAGGCAAACAACATTCC	TTGGTTACATACTTGGACTTGGTGatagacatgtacagaatatcttgata aatgagcagtcagcagaacttgtacatatagatctaggtaagtaataaaa tctatgtatctattctttttagtaaatatttggtcatcatGGAATGTTGT TTGCCTACCAA	chr11:108347279+108347439	161	0.31677
	ATM-3	ACAGCAGAGGCCGGAAGATGAAAC	TGAGGTGAACAGTTTAAAGGCCTTGGG	ACAGCAGAGGCCGGAAGATGAAACtgagcttcaccctactctgaatgcag atgaccaagaatgcaaacgaaatctcaggtgagcagtattttaagaaggt cctgttgtcagtttttcagattttcttattCCCAAGGCCTTTAAACTGTT CACCTCA	chr11:108365141+108365297	157	0.426752
	ATM-4	TCAAACTATTGGGTGGATTTGTT	GTGTCGAAGACAGCTGGTGA	TCAAACTATTGGGTGGATTTGTTtgtatattctaggtgaaaactgacttt tgtcagactgtacttccatacttgattcatgatattttactccaagatac aaatgaatcatggagaaatctgctttctacacatgttcagggattttTCA CCAGCTGTCTTCGACAC	chr11:108304640+108304806	167	0.359281
	ATM-5	TTACAGGTGCTTATGAATCAACAAA	TCTGCCATCAATTCAATCAAA	TTACAGGTGCTTATGAATCAACAAAatggagaagtattttatacaactta tatgatctgctagtgaatgagataagtcatataggaagtagaggaaagta ttcttcaggatttcgtaatattgccgtcaaagaaaaTTTGATTGAATTGA TGGCAGA	chr11:108246958+108247114	157	0.318471
	ATM-6	TTGTAGTTCTGTTAAAGTTCATGG	AGCGTTTACGATCCTCTTT	TTGTAGTTCTGTTAAAGTTCATGGcttttgtgttttaccttaattattct atgcaagatacacagtaaaggttcagcgagagctggagttggatgaatta gccctgcgtgcactgAAAGAGGATCGTAAACGCT	chr11:108330157+108330290	134	0.402985
	ATM-7	TGGCACTGACCACCAGTATAGTTCCAG	GTGAAGAATTGGAGGCACTTCTGTGCT	TGGCACTGACCACCAGTATAGTTCCAGgaacggtaaaaatgggaatagag caaaatatgtgtgaagtaaatagaagcttttctttaaaggaatcaataat gaaatggctcttattctatcagttagagggtgacttagaaaatAGCACAG AAGTGCCTCCAATTCTTCAC	chr11:108251860+108252029	170	0.370588
	ATM-8	GCTGAAAACTTTGGCTTACTTGGAGCC	TGTGAGTGTGTGTGTGTCTGTGTGTG	GCTGAAAACTTTGGCTTACTTGGAGCCataattcagggtagtttagttga ggttgacagagaattctggaagttatttactgggtcagcctgcagacctt catggtaagttcagcatgcattatgtctgacttacagataaaCACACACA GACACACACACACTCACA	chr11:108250969+108251136	168	0.422619
	ATM-9	GTTTTGATTCCACATCTGGTGA	CCACTGTCTCTGGTACCCTCA	GTTTTGATTCCACATCTGGTGAttagaagtcattttgatgaggtgaagtc cattgctaatcagattcaagaggactggaaaagtcttctaacagactgct ttccaaagattcttgtaaatattcttccttattttgcctaTGAGGGTACC AGAGACAGTGG	chr11:108284240+108284400	161	0.385093
	ATM-10	AACAATGCTTGCTGTTGTGG	CACTTTGCAACACCTTCACC	AACAATGCTTGCTGTTGTGGactacatgagaagacaaaagaggtaatgta atgagtgttgcttcttacgtttaggatctagagtgtaacttgttaactat cggctgaattttaacatgattattttaGGTGAAGGTGTTGCAAAGTG	chr11:108307943+108308089	147	0.360544
	ATM-11	AGGATAATGAAAACCTCTATATCACGA	CCAAGAGTGAAAAGGGTCCTC	AGGATAATGAAAACCTCTATATCACGAttaagcttttagatccttttcct gaccatgttgtttttaaggatttgcgtattactcagcaaaaaatcaaata cagtaGAGGACCCTTTTCACTCTTGG	chr11:108293350+108293475	126	0.349206
BRCA1	BRCA1-1	GCGGCCCATCTCTGCAAAGGG	CCACCAAGGTCCAAAGCGAGCA	GCGGCCCATCTCTGCAAAGGGgagtggaatacagagtggtggggtgagat ttttgtcaacttgagggagggagctttacctttctgtcctgggattctct TGCTCGCTTTGGACCTTGGTGG	chr17:43056973-43057094	122	0.532787
	BRCA1-2	GGAGATAATCATAGGAATCCCAAA	TGTGTTAAAGTTCATTGGAACAGAA	GGAGATAATCATAGGAATCCCAAAttaatacactcttgtgctgacttacc agatgggacactctaagattttctgcatagcattaatgacattttgtact tcttcaacgcgaagagcagataaatccatttctTTCTGTTCCAATGAACT TTAACACA	chr17:43123968-43124125	158	0.360759
	BRCA1-3	TCCTGGGTTATGAAGGACAAA	CCCTACCCTGCTAGTCTGGA	TCCTGGGTTATGAAGGACAAAaacaaaagctaataatggagccacataac acattcaaacttacttgcaaaatatgtggtcacactttgtggagacaggt tccttgatcaacTCCAGACTAGCAGGGTAGGG	chr17:43115662+43115793	132	0.416667
	BRCA1-4	CCCATCATGTGAGTCATCAGAA	CAGAAACTGCCATGCTCAGA	CCCATCATGTGAGTCATCAGAAcctaacagttcatcacttctggaaaacc actcattaactttctgaatgctgctatttagtgttatccaaggaacatct tcagtatctctaggattcTCTGAGCATGGCAGTTTCTG	chr17:43094328-43094465	138	0.405797
	BRCA1-5	TTTGCCTTCCCTAGAGTGCT	CCCAAAGATCTCATGTTAAGTGG	TTTGCCTTCCCTAGAGTGCTaacttccagtaacgagatactttcctgagt gccataatcagtaccaggtaccaatgaaatactgctactctctacagatc tttcagtttgcaaaaccctttctCCACTTAACATGAGATCTTTGGG	chr17:43093147-43093292	146	0.417808
	BRCA1-6	ACGGCTAATTGTGCTCACTG	CCCATATCGTATACCACCACTTT	ACGGCTAATTGTGCTCACTGTacttggaatgttctcatttcccatttctc tttcaggtgacattgaatgttcctcaaagttttcctctagcagatttttc ttacatttagttttaacaaatgacttgatgggaaAAAGTGGTGGTATACG ATATGGG	chr17:43092447-43092603	157	0.369427
	BRCA1-7	AACAGGTCATCAGGTGTCTCAG	CCTGGAAGTAATTGTAAGCATCC	AACAGGTCATCAGGTGTCTCAGaacaaacctgagatgcatgactacttcc cataggctgttctaagttatctgaaatcagatatggagagaaatctgtat taacagtctgaactacttcttcatattcttgcttttttatttcaGGATGC TTACAATTACTTCCAGG	chr17:43092070-43092236	167	0.371257
	BRCA1-8	TCCAAGCCCGTTCCTCTTTCTTCA	AACACCCAGGATCCTTTCTTGATTGGT	TCCAAGCCCGTTCCTCTTTCTTCAtcatctgaaaccaattccttgtcact cagaccaactccctggctttcagactgatgcctcatttgtttggaagaAC CAATCAAGAAAGGATCCTGGGTGTT	chr17:43091476-43091600	125	0.456
	BRCA1-9	CTGGGAAAGTATCGCTGTCAT	CCCACCTAATTGTACTGAATTGC	CTGGGAAAGTATCGCTGTCATgtcttttacttgtctgttcatttggcttg ttactcttcttggctccagttgcaggttctttaccttccatgagttgtag gtttctgctgtgcctgactggcatttggttgtacttttttttctttatct cttcactgctagaacaactatcaatttGCAATTCAGTACAATTAGGTGGG	chr17:43093436-43093635	200	0.405
	BRCA1-10	GTGGTTGCTTCCAACCTAGC	TTCATGGCTATTTGCCTTTTG	GTGGTTGCTTCCAACCTAGCatcattaccaaattatataccttttggtta tatcattcttacataaaggacactgtgaaggccctttcttctggttgaga agtttcagcatgcaaaatctataaattataaagaaagaaagaacaattta atttacttccttttgtagaaagaatactCAAAAGGCAAATAGCCATGAA	chr17:43106416+43106614	199	0.321608
FOXA1	FOXA1-1	GGCTGGCGGGCAACGTAGAG	GTCCCAGCTGCACCTGAAAGGG	GGCTGGCGGGCAACGTAGAGccgtaaggcgagtattgcagtgcctgttcg tatgccttgaagtccagcttatgctgctgctccgaggaggacatgaggtt gttgatggagaacgggtggttgaaggagtagtgggggtcCCCTTTCAGGT GCAGCTGGGAC	chr14:37591475-37591635	161	0.57764
	FOXA1-2	CCCGGCTGCTTCTCGCACTT	CCATCCGCCACTCGCTGTCC	CCCGGCTGCTTCTCGCACTTgaagcgcttctggcggcgcaagtagcagcc gttctcgaacatgttgccggagtccgggtgcagcgtccagtaggagccct tgcccggcttgtccggggagcgtgccaccttgacgaagcagtcattgaaG GACAGCGAGTGGCGGATGG	chr14:37591966-37592134	169	0.639053
	FOXA1-3	GGGAGCGTGCCACCTTGACG	GGCGCCCAGCAAGATGCTCA	GGGAGCGTGCCACCTTGACGaagcagtcattgaaggacagcgagtggcgg atggagttctgccagcgctgctggttctgccggtaataggggaagaggtc catgatccactggtagatctcgctcagcgTGAGCATCTTGCTGGGCGCC	chr14:37592081-37592229	149	0.597315
	FOXA1-4	ATCTTGCTGGGCGCCTGCTG	GTACGCGCCGTCCAACCTGG	ATCTTGCTGGGCGCCTGCTGgatggccatggtgatgagcgagatgtacga gtagggcggcttggcgtgcgggtagctgcgcttgaacgtcttggcgtcgc cgccgccgcccgcgcggctgcggcCCAGGTTGGACGGCGCGTAC	chr14:37592215-37592358	144	0.694444
BRCA2	BRCA2-1	GCATCACCTTCAAGAAAGGTACA	CCTTTCATTAGCTACTTGGAAGACA	GCATCACCTTCAAGAAAGGTACAattcaaccaaaacacaaatctaagagt aatccaaaaaaatcaagaagaaactacttcaatttcaaaaataactgtca atccagactctgaagaacttttctcagacaatgagaataatttTGTCTTC CAAGTAGCTAATGAAAGG	chr13:32336882-32337049	168	0.321429
	BRCA2-2	TGAAGTGCCTGAAAACCAGA	TTTTCAACAGGCCAGCAAA	TGAAGTGCCTGAAAACCAGAtgactatcttaaagaccacttctgaggaat gcagagatgctgatcttcatgtcataatgaatgccccatcgattggtcag gtagacagcagcaagcaatttgaaggtacagttgaaattaaacggaagTT TGCTGGCCTGTTGAAAA	chr13:32337781-32337947	167	0.419162
	BRCA2-3	GCCATCAATGGGCAAAGACCCTAAAGT	AGCTTAGGTGGCACCACAGTCTCA	GCCATCAATGGGCAAAGACCCTAAAGTacagagaggcctgtaaagacctt gaattagcatgtgagaccattgagatcacagctgccccaaagtgtaaaga aatgcagaattctctcaataatgataaaaaccttgtttctatTGAGACTG TGGTGCCACCTAAGCT	chr13:32339034-32339199	166	0.421687
	BRCA2-4	ACAGGCAGACCAACCAAAGT	TCATCAGAGCCATGTCCATC	ACAGGCAGACCAACCAAAGTctttgttccaccttttaaaactaaatcaca ttttcacagagttgaacagtgtgttaggaatattaacttggaggaaaaca gacaaaagcaaaacattGATGGACATGGCTCTGATGA	chr13:32355048-32355184	137	0.372263
	BRCA2-5	ACAGATGTGAGCCACTGTGC	TTGCTGCTTCCTTTTCTTCC	ACAGATGTGAGCCACTGTGCctggcctgatacaattaacttgaatgttat atatgtgacttttttggtgtgtgtaacacattattacagtggatggagaa gacatcatctggattatacatatttcgcaatgaaagagaGGAAGAAAAGG AAGCAGCAA	chr13:32370867-32371025	159	0.377358
	BRCA2-6	TTTGTTTTGTTTTCTGTAGGTTTCA	TCACAACAGAAACGACAAATCC	TTTGTTTTGTTTTCTGTAGGTTTCAgatgaaattttatttcagatttacc agccacgggagccccttcacttcagcaaatttttagatccagactttcag ccatcttgttctgaggtggacctaataGGATTTGTCGTTTCTGTTGTGA	chr13:32379988-32380136	149	0.389262
	BRCA2-7	TTGCCCCTTTCGTCTATTTG	GCCTGATTTGGATTCTGGTC	TTGCCCCTTTCGTCTATTTGtcagacgaatgttacaatttactggcaata aagttttggatagaccttaatgaggacattattaagcctcatatgttaat tgctgcaagcaacctccagtggcGACCAGAATCCAAATCAGGC	chr13:32394692-32394834	143	0.405594
	BRCA2-8	TGATGACCAAAAGAACTGCAA	TGGGTGTTTCGTATTTGGTG	TGATGACCAAAAGAACTGCAAaaagagaagagccttggatttcttgagta gactgcctttacctccacctgttagtcccatttgtacatttgtttctccg gctgcacagaaggcatttcagccaccaaggagttgtggCACCAAATACGA AACACCCA	chr13:32398290-32398447	158	0.455696
	BRCA2-9	CATTTCAGCCACCAAGGAGT	TCAATGCAAGTTCTTCGTCAG	CATTTCAGCCACCAAGGAGTtgtggcaccaaatacgaaacacccataaag aaaaaagaactgaattctcctcagatgactccatttaaaaaattcaatga aatttctcttttggaaagtaattcaatagCTGACGAAGAACTTGCATTGA	chr13:32398403-32398552	150	0.353333
	BRCA2-10	GAATTCTCCTCAGATGACTCCATT	TGGGAGCAGTCCTAGTGGAT	GAATTCTCCTCAGATGACTCCATTtaaaaaattcaatgaaatttctcttt tggaaagtaattcaatagctgacgaagaacttgcattgataaatacccaa gctcttttgtctggttcaacaggagaaaaacaatttatatctgtcagtga ATCCACTAGGACTGCTCCCA	chr13:32398464+32398633	170	0.352941
ERBB2	ERBB2-1	GTGGTGCACGAAGGGCCAGG	GGCACAGGGCTTGCTGCACT	GTGGTGCACGAAGGGCCAGGgtatgtggctacatgttcctgatctcctta gacaactacctttctacggacgtgggatcctgcaccctcgtctgccccct gcacaaccaagaggtgacagcagaggatggaacacagcggtgtgagaAGT GCAGCAAGCCCTGTGCC	chr17:39711877-39712043	167	0.57485
	ERBB2-2	TCTCACCCTCTGCCTGCAGGTTAC	GGGACTCCTCCCTGGGACTCCT	TCTCACCCTCTGCCTGCAGGTTACctatacatctcagcatggccggacag cctgcctgacctcagcgtcttccagaacctgcaagtaatccggggacgaa ttctgcacaagtgagcactgagaaagagggggcctgatggggAGGAGTCC CAGGGAGGAGTCCC	chr17:39715427-39715590	164	0.585366
	ERBB2-3	TCCCTGACCCTGGCTTCCGC	CCTGCAGCAGTCTCCGCATCG	TCCCTGACCCTGGCTTCCGCccccagccctctgacgtccatcatctctgc ggtggttggcattctgctggtcgtggtcttgggggtggtctttgggatcc tcatcaagcgacggcagcagaagatccggaagtacaCGATGCGGAGACTG CTGCAGG	chr17:39723293-39723449	157	0.611465
	ERBB2-4	AGCCCACGCTCTTCTCACTCATATCC	CCTAGCAGGAGAGGGTGGAGGG	AGCCCACGCTCTTCTCACTCATATCCtcctctttctgcccagggcatctg gatccctgatggggagaatgtgaaaattccagtggccatcaaagtgttga gggaaaacacatcccccaaagccaacaaagaaatcttagacgtaagcCCC TCCACCCTCTCCTGCTAGG	chr17:39723870-39724038	169	0.514793
	ERBB2-5	CCCTCTCAGCGTACCCTTGTCCC	CCGGACATGGTCTAAGAGGCAGC	CCCTCTCAGCGTACCCTTGTCCCcaggaagcatacgtgatggctggtgtg ggctccccatatgtctcccgccttctgggcatctgcctgacatccacggt gcagctggtgacacagcttatgccctatgGCTGCCTCTTAGACCATGTCC GG	chr17:39724700-39724851	152	0.598684
	ERBB2-6	CCCAGGCCCTCCCAGAAGGT	CCGAGCCAGCCCGAAGTCTG	CCCAGGCCCTCCCAGAAGGTctacatgggtgcttcccattccaggggatg agctacctggaggatgtgcggctcgtacacagggacttggccgctcggaa cgtgctggtcaagagtcccaaccatgtcaaaattaCAGACTTCGGGCTGG CTCGG	chr17:39725005-39725159	155	0.593548
	ERBB2-7	TTCTGCCCTCCCAGGTGCCC	GCCATGGCTCCTCACCCACC	TTCTGCCCTCCCAGGTGCCCatcaagtggatggcgctggagtccattctc cgccggcggttcacccaccagagtgatgtgtggagttatggtgtgtgatg gggggtgttgggaggGGTGGGTGAGGAGCCATGGC	chr17:39725313-39725447	135	0.622222
	ERBB2-8	GGGCAGAGGGAGTGGCAGAGA	GAGTGGCACCAGCAGGTCGG	GGGCAGAGGGAGTGGCAGAGAcaccggggttccttcccctaatgggtcac cttctcttgacctttcagaatatgtgaaccagccagatgttcggccccag cccccttcgccccgagagggccctctgcctgctgcCCGACCTGCTGGTGC CACTC	chr17:39727621-39727775	155	0.632258
	ERBB2-9	GCCCACAGCCATGCCCACAG	CACACTGGGTGGGCCCTGGA	GCCCACAGCCATGCCCACAGccagttccctggttcacttggacctggggc ctcccctaaaagtcccctgcggtcccttcctcctcactgcagtgggcgag ggcctggcctgccaccagctgtgcgcccgagggcactgctggggTCCAGG GCCCACCCAGTGTG	chr17:39716209-39716372	164	0.689024
CBFB	CBFB-1	GGCGGTCAGTCGGTCAGCG	CACCTCACACTCGCGGCTCA	GGCGGTCAGTCGGTCAGCGcggagccagccagcgggtgcccgcgcaagcc ccgagcgcggccggccggcgcggcctcagggcgggaagatgccgcgcgtc gtgcccgaccagagaagcaagttcgagaacgaggagttttttaggaagcT GAGCCGCGAGTGTGAGGTG	chr16:67029320-67029488	169	0.704142
	CBFB-2	TCCTGCTCCTGATCCTGTTT	TGTTTCCTACCTTGCCTGCT	TCCTGCTCCTGATCCTGTTTgtattgatttttctaaaaggcttttgtggc cacaggaaccaatctgtctctccagttttttccggccagctggcagggag aacagcgacaaacacctagccgagagtatgtcgacttagaaagagaAGCA GGCAAGGTAGGAAACA	chr16:67036600-67036765	166	0.475904
	CBFB-3	TTCATGTGTCTGATGGTTTTCA	CTCGCTCCTCATCAAACTCC	TTCATGTGTCTGATGGTTTTCAattattttcatccttttctgtgtcttag gtatatttgaaggctcccatgattctgaatggagtctgtgttatctggaa aggctggattgatctccaaagactggatggtatgggctgtctGGAGTTTG ATGAGGAGCGAG	chr16:67066632-67066793	162	0.419753
	CBFB-4N	ACACTGACGACATGGTTCTACATCCAAAGACTGGATGGTATGGGCTGT	TACGGTAGCAGAGACTTGGTCTAGGTCCCCAGGCAAAGGCAAGA	TCCAAAGACTGGATGGTATGGGCTGTctggagtttgatgaggagcgagcc caggtagggtaacatcaggctttattgagcatggtccctttagtccctaa TCTTGCCTTTGCCTGGGGACCT	chr16:67066746+67066867	122	0.516393
	CBFB-5	AGGAGGATGCATTAGCACAACAGGC	ACTGCCAGCAGCTGTGAAACTCTC	AGGAGGATGCATTAGCACAACAGGCctttgaagaggctcggagaaggaca cgcgaatttgaagatagagacaggtctcatcgggaggaaatggaggtGAG AGTTTCACAGCTGCTGGCAGT	chr16:67082214-67082334	121	0.512397
	CBFB-6	GAGGAACGCCAGGCACGCTT	ACTCAGTTCCGGGAGCCGCA	GAGGAACGCCAGGCACGCTTccagaacgcctgccgcgacggccgctcgga aatcgtaagtcggctggcccggggcgcgcgcgggtcacttgttgcgcggg gccgcggcggcccaggccggttccggacggcggcgcggctgcTGCGGCTC CCGGAACTGAGT	chr16:67029760-67029921	162	0.753086
EGFR	EGFR-1	ACACTGACGACATGGTTCTACATGGTGAGGGCTGAGGTG	TACGGTAGCAGAGACTTGGTCTCCTGTGCCAGGGACCTTAC	TGGTGAGGGCTGAGGTGacccttgtctctgtgttcttgtcccccccagct tgtggagcctcttacacccagtggagaagctcccaaccaagctctcttga ggatcttgaaggaaactgaattcaaaaagatcaaagtgctgggctccggt gcgttcggcacggtgtataagGTAAGGTCCCTGGCACAGG	chr7:55173873+55174062	190	0.542105
	EGFR-2	ACACTGACGACATGGTTCTACAGCGTCTTCACCTGGAAGGG	TACGGTAGCAGAGACTTGGTCTCCGGACATAGTCCAGGAGG	GCGTCTTCACCTGGAAGGGgtccatgtgcccctccttctggccaccatgc gaagccacactgacgtgcctctccctccctccaggaagcctacgtgatgg ccagcgtggacaacccccacgtgtgccgcctgctgggcatctgcctcacc tccaccgtgcagctcatcacgcagctcatgcccttcggctgCCTCCTGGA CTATGTCCGG	chr7:55181209+55181418	210	0.647619
	EGFR-3	ACACTGACGACATGGTTCTACAGCGTGGACAACCCCCAC	TACGGTAGCAGAGACTTGGTCTGGCTCCTTATCTCCCCTCC	GCGTGGACAACCCCCACgtgtgccgcctgctgggcatctgcctcacctcc accgtgcagctcatcacgcagctcatgcccttcggctgcctcctggacta tgtccgggaacacaaagacaatattggctcccagtacctgctcaactggt gtgtgcagatcgcaaaggtaatcagggaagggagatacggGGAGGGGAGA TAAGGAGCC	chr7:55181312+55181520	209	0.593301
	EGFR-4	ACACTGACGACATGGTTCTACAGTGTCACTCGTAATTAGGTCCA	TACGGTAGCAGAGACTTGGTCTGGCCTCAGTACAAACTCATTAGC	GTGTCACTCGTAATTAGGTCCAgagtgagttaactttttccaacagaggg aaactaatagttgtctcactgcctcatctctcaccatcccaaggtgccta tcaagtggatggcattggaatcaattttacacagaatctatacccaccag agtgatgtctggagctacggtgagtcataatcctgatGCTAATGAGTTTG TACTGAGGCC	chr7:55192673+55192882	210	0.442857
	EGFR-5	ACACTGACGACATGGTTCTACAGGATGCAGAGCTTCTTCCCA	TACGGTAGCAGAGACTTGGTCTTTCTCTTCCGCACCCAG	GGATGCAGAGCTTCTTCCCAtgatgatctgtccctcacagcagggtcttc tctgtttcagggcatgaactacttggaggaccgtcgcttggtgcaccgcg acctggcagccaggaacgtactggtgaaaacaccgcagcatgtcaagatc acagattttgggctggccaaactgCTGGGTGCGGAAGAGAA	chr7:55191659+55191849	191	0.549738
	EGFR-6	ACACTGACGACATGGTTCTACAGGTCTTCTCTGTTTCAGGGCAT	TACGGTAGCAGAGACTTGGTCTGCTGACCTAAAGCCACCTCC	GGTCTTCTCTGTTTCAGGGCATgaactacttggaggaccgtcgcttggtg caccgcgacctggcagccaggaacgtactggtgaaaacaccgcagcatgt caagatcacagattttgggctggccaaactgctgggtgcggaagagaaag aataccatgcagaaggaggcaaagtaaGGAGGTGGCTTTAGGTCAGC	chr7:55191702+55191898	197	0.538071
	EGFR-7	ACACTGACGACATGGTTCTACATACCCTCCATGAGGCACAC	TACGGTAGCAGAGACTTGGTCTGGAGAgCTGTAAATTCTGGCTT	TACCCTCCATGAGGCACACcacctgcattcaggaaaagtggatgagatgt ggtacaagcattccatgggcaacttctctgtttctttttcagagtgcaac cagcaacaattccaccgtggcttgcattgatagaaatggggtatgtatga acaccttatAAGCCAGAATTTACAGCTCTCC	chr7:55201643+55201823	181	0.453039
	EGFR-8	ACACTGACGACATGGTTCTACATGTTCATTCATGATCCCACTGC	TACGGTAGCAGAGACTTGGTCTCCACCAGTCACTCACACTTG	TGTTCATTCATGATCCCACTGCcttcttttcttgcttcatcctctcaggg gtgactgtttgggagttgatgacctttggatccaagccatatgacggaat ccctgccagcgagatctcctccatcctggagaaaggagaacgcctccctc agccacccatatgtaccatcgatgtctacatgatcatggtCAAGTGTGAG TGACTGGTGG	chr7:55198669+55198878	210	0.504762
	EGFR-9	ACACTGACGACATGGTTCTACATCCCTGCCAGCGAGAT	TACGGTAGCAGAGACTTGGTCTAGGGATGCAAAGGCCTCA	TCCCTGCCAGCGAGATctcctccatcctggagaaaggagaacgcctccct cagccacccatatgtaccatcgatgtctacatgatcatggtcaagtgtga gtgactggtgggtctgtccacactgcctagctgagccttggtggctgctc ttagccaaacagcTGAGGCCTTTGCATCCCT	chr7:55198768+55198948	181	0.552486
	EGFR-10	ACACTGACGACATGGTTCTACAGCCTTCTTTAAGCAATGCCATCTTTAT	TACGGTAGCAGAGACTTGGTCTCAATGGAAGCaCAGACTGCAA	GCCTTCTTTAAGCAATGCCATCTTTATcatttcttccagtgttctaattg cactgttttttctcattccttccccaggctggatgatagacgcagatagt cgcccaaagttccgtgagttgatcatcgaattctccaaaatggcccgaga cccccagcgctaccttgtcattcaggtacaaaTTGCAGTCTGTGCTTCCA TTG	chr7:55200239+55200441	203	0.458128
	EGFR-11	ACACTGACGACATGGTTCTACACCCCTGCTCCTATAGCCAA	TACGGTAGCAGAGACTTGGTCTATGAGGTACTCGTCGGCATC	CCCCTGCTCCTATAGCCAAgaagtggaatagcatctctacgggccattct aatagcctcaaaatctctgcaccagggggatgaaagaatgcatttgccaa gtcctacagactccaacttctaccgtgccctgatggatgaagaagacatg gacgacgtggtgGATGCCGACGAGTACCTCAT	chr7:55201113+55201294	182	0.505495
	EGFR-12	ACACTGACGACATGGTTCTACAACTTCTACCGTGCCCTGA	TACGGTAGCAGAGACTTGGTCTGTTCAAATGAGTAGACACAGCTT	ACTTCTACCGTGCCCTGAtggatgaagaagacatggacgacgtggtggat gccgacgagtacctcatcccacagcagggcttcttcagcagcccctccac gtcacggactcccctcctgagctctctggtatgaaatctctgtctctctc tctctctcAAGCTGTGTCTACTCATTTGAAC	chr7:55201228+55201408	181	0.541436
	EGFR-13	ACACTGACGACATGGTTCTACATCACAATTGCCAGTTAACGTCT	TACGGTAGCAGAGACTTGGTCTCCACACAGCAAAGCAGAAAC	TCACAATTGCCAGTTAACGTCTtccttctctctctgtcatagggactctg gatcccagaaggtgagaaagttaaaattcccgtcgctatcaaggaattaa gagaagcaacatctccgaaagccaacaaggaaatcctcgatgtgaGTTTC TGCTTTGCTGTGTGG	chr7:55174680+55174844	165	0.448485
	EGFR-14	ACACTGACGACATGGTTCTACAGCCCTCAACACAGTGGAGCGA	TACGGTAGCAGAGACTTGGTCTGGCATCCCAGCCTCTCACCCT	GCCCTCAACACAGTGGAGCGAattcctttggaaaacctgcagatcatcag aggaaatatgtactacgaaaattcctatgccttagcagtcttatctaact atgatgcaaataaaaccggactgaaggagctgcccatgagaaatttacAG GGTGAGAGGCTGGGATGCC	chr7:55143338+55143506	169	0.449704
SF3B1	SF3B1-1	ACACTGACGACATGGTTCTACAAATCAAAAGGTAATTGGTGGATTT	TACGGTAGCAGAGACTTGGTCTAGTTAAAACCTGTGTTTGGTTTTGT	AATCAAAAGGTAATTGGTGGATTTacctttcctctgtgttggcggatacc cttccataaaggctttaacacagaatcaaaagattcgataccataaggag ttgctgcttcagccaaggcagcaatggccaaagcactgatggtccgaact ttctgctgctcatccacaagacctACAAAACCAAACACAGGTTTTAACT	chr2:197401959+197402157	199	0.432161
	SF3B1-2	ACACTGACGACATGGTTCTACAGGAGAACAAACCTTATGCAC	TACGGTAGCAGAGACTTGGTCTTAAAGCTCGTGAATTTGGAG	GGAGAACAAACCTTATGCACatatggacgaactaagtcatcaagtttgta cagtatcctatcaataactttcacaagtaaatgacgctcttgatcctcaa gtgtaggagacatcagcagaggaagaatctgattaaacaaaggaccagCT CCAAATTCACGAGCTTTA	chr2:197403574+197403741	168	0.392857
ESR1	ESR1-1	ACACTGACGACATGGTTCTACAGCACCCAGGGAAGCTACTGT	TACGGTAGCAGAGACTTGGTCTCACCGAGAGATGAATAAAATAGTTTCATGA	GCACCCAGGGAAGCTACTGTttgctcctaacttgctcttggacaggtaag tgacctggctgtagcttaggagtagcatgttctttacgatcatagttcat TCATGAAACTATTTTATTCATCTCTCGGTG	chr6:152011750+152011879	130	0.438462
	ESR1-2	ACACTGACGACATGGTTCTACACTTCTAGAATGTGCCTGGCTAGA	TACGGTAGCAGAGACTTGGTCTCCTGTCCAAGAGCAAGTTAGGAG	CTTCTAGAATGTGCCTGGCTAGAgatcctgatgattggtctcgtctggcg ctccatggagcacccagggaagctactgtttgCTCCTAACTTGCTCTTGG ACAGG	chr6:152011691+152011795	105	0.533333
	ESR1-3	ACACTGACGACATGGTTCTACATTTCATTTGAGTCAGCAGGGTTTTT	TACGGTAGCAGAGACTTGGTCTCCAGACGAGACCAATCATCAGG	TTTCATTTGAGTCAGCAGGGTTTTTcttgcttgttttcaggctttgtgga tttgaccctccatgatcaggtccaccttctagaatgtgcctggctagaga tCCTGATGATTGGTCTCGTCTGG	chr6:152011616+152011738	123	0.463415
	ESR1-4	ACACTGACGACATGGTTCTACATCTCGGTTCCGCATGATGAAT	TACGGTAGCAGAGACTTGGTCTATCCAGCATTGAGTTATCTTGTGTTATC	TCTCGGTTCCGCATGATGAATctgcagggagaggagtttgtgtgcctcaa atctattattttgcttaattctggtgagttGATAACACAAGATAACTCAA TGCTGGAT	chr6:152061052+152061159	108	0.407407
	ESR1-5	ACACTGACGACATGGTTCTACATCATAGGAACCAGGGAAAATGTGT	TACGGTAGCAGAGACTTGGTCTGCACACAAACTCCTCTCCCTG	TCATAGGAACCAGGGAAAATGTGTagagggcatggtggagatcttcgaca tgctgctggctacatcatctcggttccgcatgatgaatctgCAGGGAGAG GAGTTTGTGTGC	chr6:152060985+152061096	112	0.508929
	ESR1-6	ACACTGACGACATGGTTCTACACAAGATCACAGACACTTTGATCC	TACGGTAGCAGAGACTTGGTCTGCCCACAGATGCCTCACC	CAAGATCACAGACACTTTGATCCacctgatggccaaggcaggcctgaccc tgcagcagcagcaccagcggctggcccagctcctcctcatcctctcccac atcaggcacatgaGGTGAGGCATCTGTGGGC	chr6:152094455+152094585	131	0.610687
	ESR1-7	ACACTGACGACATGGTTCTACATACATGCGCCCACTAGCCG	TACGGTAGCAGAGACTTGGTCTGCCTCCCCCGTGATGTAATAC	TACATGCGCCCACTAGCCGtggaggggcatccgtggaggagacggaccaa agccacttggccactgcgggctctacttcatcgcattccttgcaaaaGTA TTACATCACGGGGGAGGC	chr6:152098824+152098941	118	0.584746
	ESR1-8	ACACTGACGACATGGTTCTACAATGAAGTGCAAGAACGTGGTG	TACGGTAGCAGAGACTTGGTCTTGGCTTTGGTCCGTCTCCT	ATGAAGTGCAAGAACGTGGTGcccctctatgacctgctgctggagatgct ggacgcccaccgcctacatgcgcccactagccgtggaggggcatccgtgg AGGAGACGGACCAAAGCCA	chr6:152098760+152098878	119	0.621849
	ESR1-9	ACACTGACGACATGGTTCTACATGTCTTCCCACCTACAGTAACAAAG	TACGGTAGCAGAGACTTGGTCTATCTCCAGCAGCAGGTCATAGAG	TGTCTTCCCACCTACAGTAACAAAGgcatggagcatctgtacagcatgaa gtgcaagaacgtggtgcccCTCTATGACCTGCTGCTGGAGAT	chr6:152098715+152098806	92	0.51087
	ESR1-10N	ACACTGACGACATGGTTCTACATCTCTCTCTGCGCATTCAGGAGTGT	TACGGTAGCAGAGACTTGGTCTCTGCTGCTGCAGGGTCAGGC	TCTCTCTCTGCGCATTCAGGAGTGTacacatttctgtccagcaccctgaa gtctctggaagagaaggaccatatccaccgagtcctggacaagatcacag acactttgatccacctgatggccaaggcagGCCTGACCCTGCAGCAGCAG	chr6:152094366+152094515	150	0.54
PIK3R1	PIK3R1-1	ACACTGACGACATGGTTCTACACAGCACTGCCTCCTAAACCA	TACGGTAGCAGAGACTTGGTCTATGAAGTTTCTGTAGCCTTACCT	CAGCACTGCCTCCTAAACCAccaaaacctactactgtagccaacaacggt atgaataacaatatgtccttacaagatgctgaatggtactggggagatat ctcgAGGTAAGGCTACAGAAACTTCAT	chr5:68292256+68292382	127	0.433071
	PIK3R1-2	ACACTGACGACATGGTTCTACATTCAGGGAAGAAGTGAATGAAAAACT	TACGGTAGCAGAGACTTGGTCTTTCAGCTATATTCCCTGGCTTACC	TTCAGGGAAGAAGTGAATGAAAAACTtcgagatacagcagacgggacctt tttggtacgagatgcgtctactaaaatgcatggtgattatactcttacac taaGGTAAGCCAGGGAATATAGCTGAA	chr5:68293096+68293222	127	0.409449
	PIK3R1-3	ACACTGACGACATGGTTCTACAGTCACTAAACCTTAAGATGAGCATTGT	TACGGTAGCAGAGACTTGGTCTAAAGGTCCCGTCTGCTGTATCT	GTCACTAAACCTTAAGATGAGCATTGTtttgtgttttcatttcagggaag aagtgaatgaaaaacttcgAGATACAGCAGACGGGACCTTT	chr5:68293056+68293146	91	0.384615
	PIK3R1-4	ACACTGACGACATGGTTCTACAATGGCTTCTCTGACCCATTAAC	TACGGTAGCAGAGACTTGGTCTCCAATTTGGGATTATACTGAGCTAGA	ATGGCTTCTCTGACCCATTAACcttcagttctgtggttgaattaataaac cactaccggaatgaatcTCTAGCTCAGTATAATCCCAAATTGG	chr5:68293353+68293445	93	0.397849
	PIK3R1-5	ACACTGACGACATGGTTCTACAATTTTTATATTGTTTTTACAGGAAAGGGGG	TACGGTAGCAGAGACTTGGTCTGGTTTATTAATTCAACCACAGAACTG	ATTTTTATATTGTTTTTACAGGAAAGGGGGaaataacaaattaatcaaaa tatttcatcgagatgggaaatatggcttctctgacccattaaccttCAGT TCTGTGGTTGAATTAATAAACC	chr5:68293282+68293403	122	0.311475
	PIK3R1-6	ACACTGACGACATGGTTCTACACAAAGAAGATAATATTGAAGCTGTAGGGAA	TACGGTAGCAGAGACTTGGTCTGGGATGTGCGGGTATATTCTTCA	CAAAGAAGATAATATTGAAGCTGTAGGGAAaaaattacatgaatataaca ctcagtttcaagaaaaaagtcgagaatatgatagattataTGAAGAATAT ACCCGCACATCCC	chr5:68293720+68293832	113	0.309735
	PIK3R1-7	ACACTGACGACATGGTTCTACAACAGTAGAAGAAGATTGGAAGAAGACT	TACGGTAGCAGAGACTTGGTCTACATCAAGTATTGGTCTCTCGTCTT	ACAGTAGAAGAAGATTGGAAGAAGACTtgaagaagcaggcagctgagtat cgagaaattgacaaacgtatgaacagcattaaaccagaccttatccagct gagaAAGACGAGAGACCAATACTTGATGT	chr5:68295198+68295326	129	0.410853
	PIK3R1-8	ACACTGACGACATGGTTCTACACAACCGAAACAAAGCTGAAAACCT	TACGGTAGCAGAGACTTGGTCTTGTAAAGAAAAGTTTGCTGGAGATACAT	CAACCGAAACAAAGCTGAAAACCTgttgcgagggaagcgagatggcactt ttcttgtccgggagagcagtaaacagggctgctatgcctgctctgtagtg tATGTATCTCCAGCAAACTTTTCTTTACA	chr5:68296243+68296371	129	0.472868
	PIK3R1-9	ACACTGACGACATGGTTCTACACCAATATTCACTGGTGGAAGATGATG	TACGGTAGCAGAGACTTGGTCTCCATCTCGCTTCCCTCGC	CCAATATTCACTGGTGGAAGATGATGaagatttgccccatcatgatgaga agacatggaatgttggaagcagcaaccgaaacaaagctgaaaacctgttG CGAGGGAAGCGAGATGG	chr5:68296171+68296287	117	0.461538
	PIK3R1-10	ACACTGACGACATGGTTCTACATTTGCCGAGCCCTATAACTTGTAC	TACGGTAGCAGAGACTTGGTCTGTAGGCTAGTGTGACATTGAGGG	TTTGCCGAGCCCTATAACTTGTACagctctctgaaagaactggtgctaca ttaccaacacacctcccttgtgcagcacaacgactCCCTCAATGTCACAC TAGCCTAC	chr5:68297467+68297574	108	0.490741
	PIK3R1-11N	ACACTGACGACATGGTTCTACACTCCTCTCTAGGGTGGACGGCG	TACGGTAGCAGAGACTTGGTCTGTGCTGCACAAGGGAGGTGTGT	CTCCTCTCTAGGGTGGACGGCGaagtaaagcattgtgtcataaacaaaac agcaactggctatggctttgccgagccctataacttgtacagctctctga aagaactggtgctacattaccaACACACCTCCCTTGTGCAGCAC	chr5:68297401+68297544	144	0.486111
AKT1	AKT1-1	ACACTGACGACATGGTTCTACAAGAGGGCTCCAGCCAACC	TACGGTAGCAGAGACTTGGTCTATGGCACCTTCATTGGCTAC	AGAGGGCTCCAGCCAACCccccaaatctgaatcccgagaggccaagggga tacttacgcgccacagagaagttgttgaggggagcctcacgttggtccac atcctgcggccgctccttGTAGCCAATGAAGGTGCCAT	chr14:104780031+104780168	138	0.586957
	AKT1-2	ACACTGACGACATGGTTCTACACGCCACAGAGAAGTTGTTGA	TACGGTAGCAGAGACTTGGTCTAGGGTCTGACGGGTAGAGTG	CGCCACAGAGAAGTTGTTGAggggagcctcacgttggtccacatcctgcg gccgctccttgtagccaatgaaggtgccatcattcttgaggaggaagtag cgtggccgccaggtcttgatgtactcccctacagacgtgcgggtggtgag agccacgcaCACTCTACCCGTCAGACCCT	chr14:104780089+104780267	179	0.592179
AKT2	AKT2-1	ACACTGACGACATGGTTCTACAACTGACCCACTCATCCCAAG	TACGGTAGCAGAGACTTGGTCTAACCTCTCTCCCTCCCTTCC	ACTGACCCACTCATCCCAAGacacacctgctacggagaagttgtttaagg ggggtagagtctgatcaggggcctcgggcctctccttgtacccaatgaag gagccgtcgctcttcagcaggaagtaccgtggcctccaggtcttgatgta ttcacctgaaatgaggcaGGAAGGGAGGGAGAGAGGTT	chr19:40256900+40257087	188	0.553191
CDKN1B	CDKN1B-1	ACACTGACGACATGGTTCTACATTTTTGAGAGTGCGAGAGAGG	TACGGTAGCAGAGACTTGGTCTTGTCTCTGCAGTGCTTCTCC	TTTTTGAGAGTGCGAGAGAGGcggtcgtgcagacccgggagaaagatgtc aaacgtgcgagtgtctaacgggagccctagcctggagcggatggacgcca ggcaggcggagcaccccaagccctcggcctgcaggaacctcttcggcccg gtggaccacgaagagttaacccgggacttGGAGAAGCACTGCAGAGACA	chr12:12717795+12717993	199	0.61809
	CDKN1B-2	ACACTGACGACATGGTTCTACACGGTGGACCACGAAGAGTTA	TACGGTAGCAGAGACTTGGTCTCACCTTGCAGGCACCTTT	CGGTGGACCACGAAGAGTTAacccgggacttggagaagcactgcagagac atggaagaggcgagccagcgcaagtggaatttcgattttcagaatcacaa acccctagagggcaagtacgagtggcaagaggtggagaagggcagcttgc ccgagttctactacagacccccgcggccccccAAAGGTGCCTGCAAGGTG	chr12:12717943+12718142	200	0.575
	CDKN1B-3	ACACTGACGACATGGTTCTACACAGCTTGCCCGAGTTCTACT	TACGGTAGCAGAGACTTGGTCTCGCATTGCTCCGCTAACC	CAGCTTGCCCGAGTTCTACTacagacccccgcggccccccaaaggtgcct gcaaggtgccggcgcaggagagccaggatgtcagcgggagccgcccggcg gcgcctttaattggggctccggctaactctgaggacacgcatttggtgga cccaaagactgatccgtcggacagccagacggGGTTAGCGGAGCAATGCG	chr12:12718085+12718284	200	0.65
	CDKN1B-4	ACACTGACGACATGGTTCTACACCGGCTAACTCTGAGGACAC	TACGGTAGCAGAGACTTGGTCTGGCCCCAAACACATTCTATG	CCGGCTAACTCTGAGGACACgcatttggtggacccaaagactgatccgtc ggacagccagacggggttagcggagcaatgcgcaggaataaggaagcgac ctgcaaccgacggtaatgaccctttcccaacCATAGAATGTGTTTGGGGC C	chr12:12718203+12718353	151	0.562914
	CDKN1B-5	ACACTGACGACATGGTTCTACAATTTCCCCTGCGCTTAGATT	TACGGTAGCAGAGACTTGGTCTCAGTGCGTGCTCCTTTAGTG	ATTTCCCCTGCGCTTAGATTcttctactcaaaacaaaagagccaacagaa cagaagaaaatgtttcagacggttccccaaatgccggttctgtggagcag acgcccaagaagcctggcctcagaagacgtcaaacgtaaacagctcggtg ggttgatCACTAAAGGAGCACGCACTG	chr12:12718808+12718984	177	0.491525
MAP2K4	MAP2K4-1	ACACTGACGACATGGTTCTACATGGAAAAATTGCTTCCCAAT	TACGGTAGCAGAGACTTGGTCTCTGCCATTATTTGCCCACTT	TGGAAAAATTGCTTCCCAATattttaacagagagagactgagaacacaca gcattgagtcatcaggaaaactgaagatctcccctgaacaacactgggat ttcactgcagaggacttgaaagaccttggagaaattggacgaggagctta tggttctgtcaacaaaatggtccacaaaccAAGTGGGCAAATAATGGCAG	chr17:12081326+12081525	200	0.43
	MAP2K4-2	ACACTGACGACATGGTTCTACACACAGCATTGAGTCATCAGGA	TACGGTAGCAGAGACTTGGTCTCAAAAATAATCATGGCATCACC	CACAGCATTGAGTCATCAGGAaaactgaagatctcccctgaacaacactg ggatttcactgcagaggacttgaaagaccttggagaaattggacgaggag cttatggttctgtcaacaaaatggtccacaaaccaagtgggcaaataatg gcagttaaagtaGGTGATGCCATGATTATTTTTG	chr17:12081372+12081555	184	0.429348
	MAP2K4-3	ACACTGACGACATGGTTCTACACATCTTTTGTCATTCTTTTCCAGA	TACGGTAGCAGAGACTTGGTCTTTCATTAGTCAGCTAAAACCCAGTT	CATCTTTTGTCATTCTTTTCCAGAgaattcggtcaacagtggatgaaaaa gaacaaaaacaacttcttatggatttggatgtagtaatgcggagtagtga ttgcccatacattgttcagttttatggtgcactcttcagagaggtaggaa taAACTGGGTTTTAGCTGACTAATGAA	chr17:12095552+12095728	177	0.372881
	MAP2K4-4	ACACTGACGACATGGTTCTACAGGTGATATTTAAGATGTATAAGAATAACAGA	TACGGTAGCAGAGACTTGGTCTCACAATGAATAATTTAAAGACCAGGTA	GGTGATATTTAAGATGTATAAGAATAACAGAtatttgttattttataggg tgactgttggatctgtatggaactcatgtctacctcgtttgataagtttt acaaatatgtatatagtgtattagatgatgttattccagaagaaatttta ggcaaaatcactttagcagtaagTACCTGGTCTTTAAATTATTCATTGTG	chr17:12107742+12107941	200	0.295
	MAP2K4-5	ACACTGACGACATGGTTCTACAGGAAGAAGCTAATTGTATACTGAATGA	TACGGTAGCAGAGACTTGGTCTGCAAGAAGGCCTGGACTTAAC	GGAAGAAGCTAATTGTATACTGAATGAtatctatgtcttgcagatatcaa accttccaatattcttctggacagaagtggaaatattaagctctgtgact tcggcatcagtggacagcttgtggactctattgccaagacaagagatgct ggctgtaggccatacatggcagtaagtGTTAAGTCCAGGCCTTCTTGC	chr17:12113190+12113387	198	0.429293
	MAP2K4-6	ACACTGACGACATGGTTCTACATGATGCCTGGTGTATTTTGC	TACGGTAGCAGAGACTTGGTCTCCACAAGTTGACAAAGTTGATGA	TGATGCCTGGTGTATTTTGCtctttcctctttgttctctttagtatgagt tggccacaggccgatttccttatccaaagtggaatagtgtatttgatcaa ctaacacaagtcgtgaaaggagatcctccgcagctgagtaattctgagga aagggaattctccccgagttTCATCAACTTTGTCAACTTGTGG	chr17:12129096+12129288	193	0.430052
	MAP2K4-7	ACACTGACGACATGGTTCTACACCTGTTTTGTAGTACTTGAAACTTTTACTT	TACGGTAGCAGAGACTTGGTCTTGCTTGAGTTGAGCCTTTGA	CCTGTTTTGTAGTACTTGAAACTTTTACTTtttatttgttatttctcagg taaacgcaaagcactgaagttgaattttgcaaatccacctttcaaatcta cagcaaggtttactctgaatcccaatcctacaggagttcaaaacccacac atgtgagtattcttggtaaTCAAAGGCTCAACTCAAGCA	chr17:12054840+12055028	189	0.365079
	MAP2K4-8	ACACTGACGACATGGTTCTACATCCCATCTCTCCTTTTTCTCC	TACGGTAGCAGAGACTTGGTCTTTTTCAATAACCGTTTCACCAA	TCCCATCTCTCCTTTTTCTCCctagactgtgaaagcactaaaccacttaa aagaaaacttgaaaattattcacagaggtgggtatggattggtatttttt gtaatagaaattaacttttttctcctaaTTGGTGAAACGGTTATTGAAAA	chr17:12110350+12110499	150	0.326667
	MAP2K4-9	ACACTGACGACATGGTTCTACATTGCCTATTCCTTGAGTGTAAGG	TACGGTAGCAGAGACTTGGTCTGCTACTGTGGCAAGGTTGAA	TTGCCTATTCCTTGAGTGTAAGGcaattaataacttacacttgtctttat gttccagcctgaaagaatagacccaagcgcatcacgacaaggatatgatg tccgctctgatgtctggagtttggggatcacattggtatgtttatgctga TTCAACCTTGCCACAGTAGC	chr17:12125237+12125406	170	0.429412
	MAP2K4-10	ACACTGACGACATGGTTCTACAAAAAATACTTAGGCAAATGAATCTACA	TACGGTAGCAGAGACTTGGTCTAGAGAGTTCCGGGGTTAGGA	AAAAATACTTAGGCAAATGAATCTACAttttaataatgttatttttatgt tattttagccttacgaaggatgaatccaaaaggccaaagtataaagagct tctggtgagtgtgggactgtggggattgtaggtacaTCCTAACCCCGGAA CTCTCT	chr17:12139781+12139936	156	0.365385
	MAP2K4-11	ACACTGACGACATGGTTCTACAGGCTCTTCACTCCCAACAAT	TACGGTAGCAGAGACTTGGTCTGCTAGGGGGCTGGGATCT	GGCTCTTCACTCCCAACAATggcggctccgagcccgagcggcggcggcgg ctccgggggcggcagcggcagcggcacccccggccccgtagggtccccgg cgccaggccacccggccgtcagcagcatgcagggtaaggaacgcggccgc gccgAGATCCCAGCCCCCTAGC	chr17:12020869+12021040	172	0.773256
TBX3	TBX3-1	ACACTGACGACATGGTTCTACAGGAGAAAATTTTACTGAAGAGAGCA	TACGGTAGCAGAGACTTGGTCTCACAATTCTCGGTGGATGG	GGAGAAAATTTTACTGAAGAGAGCAatgaaacttacaaatccatgtttgt ctgaaatgttgttggtgagtttcagtttgtggaaagtgacgactttggac atccactgttccccagtagcggggctgtccgggtgaatgtacatcctctt tggcatttcggggtcggccttaccagccaCCATCCACCGAGAATTGTG	chr12:114680843+114681040	198	0.469697
	TBX3-2	ACACTGACGACATGGTTCTACAACATCCTCTTTGGCATTTCG	TACGGTAGCAGAGACTTGGTCTTCTTTCTTTTTCTTTTCTATTCTTTCG	ACATCCTCTTTGGCATTTCGgggtcggccttaccagccaccatccaccga gaattgtgaaatttataacgacagtcatcagcagctataatgtccatcaa taaaatgtatttggcttttttatccagcccagaacatctcactttaaatg gaggaaacattcgcctataaaaCGAAAGAATAGAAAAGAAAAAGAAAGA	chr12:114680983+114681181	199	0.386935
BRAF	BRAF-1	ACACTGACGACATGGTTCTACATCATAATGCTTGCTCTGATAGGA	TACGGTAGCAGAGACTTGGTCTCTGATGGGACCCACTCCAT	TCATAATGCTTGCTCTGATAGGAaaatgagatctactgttttcctttact tactacacctcagatatatttcttcatgaagacctcacagtaaaaatagg tgattttggtctagctacagtgaaatctcgATGGAGTGGGTCCCATCAG	chr7:140753308-140753456	149	0.38255
SETD2	SETD2-1	ACACTGACGACATGGTTCTACAACAGCCCCAAACTTCTGCATGTACTTC	TACGGTAGCAGAGACTTGGTCTGCTGTGGTCTCTCTTCCTGTGCC	ACAGCCCCAAACTTCTGCATGTACTTCttaatgtactccttggttttgtg tttcacattctcattgcactccaggtcctcaggattcttacagtacttca gctccttattcataacaccgtgagtcagctgtccagGGCACAGGAAGAGA GACCACAGC	chr3:47017127+47017285	159	0.465409
	SETD2-2	ACACTGACGACATGGTTCTACAGCCCATACAGCTCCTCTTACC	TACGGTAGCAGAGACTTGGTCTTCTGAAATGGTTGTGACAAATAATC	GCCCATACAGCTCCTCTTACCttgtgatcacatggtagtaataaatcttc ccttctggatctcgagctgtcttccagttgggaggtaagacaatggtttt tggtttgggaggagaggggggcggcagatccaagaGATTATTTGTCACAA CCATTTCAGA	chr3:47042541+47042700	160	0.46875
	SETD2-3	ACACTGACGACATGGTTCTACATGTCCCTGAACTGGGCCGGG	TACGGTAGCAGAGACTTGGTCTCACATGTGGCAGCTCCTGTGGA	TGTCCCTGAACTGGGCCGGGggccggcactggcaagacagcaacgctgga gtcttggtgtactacaccatcactctgggccacatactgggaactggaaa ctTCCACAGGAGCTGCCACATGTG	chr3:47056981+47057104	124	0.58871
	SETD2-4	ACACTGACGACATGGTTCTACAAACCATTAGCCGGGATAAGC	TACGGTAGCAGAGACTTGGTCTGCAACTTTTTGGGTTTTTGG	AACCATTAGCCGGGATAAGCtgagcacctggtttttatcagagagaccct caccattttccatcagagcttctagctctccatccacctaccacagcaaa taaaaatacctttttataaaacaacaacaacaaaaaaaaaaaCCAAAAAC CCAAAAAGTTGC	chr3:47088161+47088322	162	0.382716
	SETD2-5	ACACTGACGACATGGTTCTACATGTTGAGCAAAAGCCGAGTA	TACGGTAGCAGAGACTTGGTCTTCGAGATATTAAGCGAATGCAG	TGTTGAGCAAAAGCCGAGTAttctaatttacttaccattcaatcatgaga agacgattaagacaatcttccccacatgctatttcaccttgagctctttc atctttagaaagaggtgtacactcacaCTGCATTCGCTTAATATCTCGA	chr3:47116588+47116736	149	0.38255
	SETD2-6	ACACTGACGACATGGTTCTACAGAGTGCAAGCCATCCACAT	TACGGTAGCAGAGACTTGGTCTGCAAGAAGAGCTGCCAATTT	GAGTGCAAGCCATCCACATgtggtatctcacaagaggaagaaaaactcaa ttctgtttttcccagtctactatctggcctgttttggaaagtggtctgtt gccaagacttatttgggacatcttcaaaatcagaagaatAAATTGGCAGC TCTTCTTGC	chr3:47120884+47121042	159	0.415094
	SETD2-7	ACACTGACGACATGGTTCTACAGGTGACACCAGAGGTTCTGTTT	TACGGTAGCAGAGACTTGGTCTATCGGAATTATCCCCTTTGG	GGTGACACCAGAGGTTCTGTTTctctaaatgggctttctgacttcttatg cagcatgcaggtatcatccaagtctttttctttgcacctactaatattct gaaatccatttgatgaaagcatgcatgctttgaCCAAAGGGGATAATTCC GAT	chr3:47122372+47122524	153	0.405229
	SETD2-8	ACACTGACGACATGGTTCTACACCAGCCTTTTCTCTTTCAGG	TACGGTAGCAGAGACTTGGTCTCCCTTTCAAAACCTATACCCAAG	CCAGCCTTTTCTCTTTCAGGatttttattaatcattcttaattcactacc ttttgaacaaggtgtctgtaaactaaaagaatgagactgtttgatttctt catttaattctgtacaacagaaagaatttttaaatttatcagaCTTGGGT ATAGGTTTTGAAAGGG	chr3:47122798+47122963	166	0.301205
	SETD2-9	ACACTGACGACATGGTTCTACATTGGCAGCTCTTCTTGCTGCCT	TACGGTAGCAGAGACTTGGTCTTCGCCTGCCTGAACTTTCTCATCC	TTGGCAGCTCTTCTTGCTGCCTagaaggtattttggctttcacggtttcc tctgaatttgggtgacccagagggtcagatttcacatctgtatgacttgt actatcaaccccatcactctgaGGATGAGAAAGTTCAGGCAGGCGA	chr3:47121026+47121171	146	0.472603
ATR	ATR-1	ACACTGACGACATGGTTCTACACGCTGATCACGCATCAGCCTCA	TACGGTAGCAGAGACTTGGTCTTCCAGAAATTGTGCCATTTCGCCTGA	CGCTGATCACGCATCAGCCTCAttgtaacttcacatgctcttcgaaaaag accctctgttcccataggacccattccattaaccatattatgagTCAGGC GAAATGGCACAATTTCTGGA	chr3:142457619+142457738	120	0.45
	ATR-2	ACACTGACGACATGGTTCTACAc	TACGGTAGCAGAGACTTGGTCTTGCAGGAGTGTATATGACAGGAA	CCATGATGTAGGATCAGGGAATgttctcagaaaccactcatgaaaaatag gaggatgcctgggcaggagaaattctcggaatactttgagtttttcagat aaagctgctgactttggtagcatacactggcgaagttcttTTCCTGTCAT ATACACTCCTGCA	chr3:142459226+142459388	163	0.429448
	ATR-3	ACACTGACGACATGGTTCTACACTGTTTGATTTGCTGTGTGGA	TACGGTAGCAGAGACTTGGTCTACCCAAGACATTGCATCTGA	CTGTTTGATTTGCTGTGTGGAcatttctcagctttcagtgcctgaaattt gtgccttgcccactgtgtgagatggtcaagcatggagaacacagtctgtg tactgagttgacacagaTCAGATGCAATGTCTTGGGT	chr3:142512280+142512416	137	0.459854
	ATR-4	ACACTGACGACATGGTTCTACACTCGGGCCCTGATATGGATCATCACT	TACGGTAGCAGAGACTTGGTCTTGAACTGGGGAGCCTGTTGAGACA	CTCGGGCCCTGATATGGATCATCACTggatgcaaatgaggcaagtattga caaaccattaaaaacctgttgatagtgttctccaatacgcagcaataatt cattatgcaatccttggaaatctTGTCTCAACAGGCTCCCCAGTTCA	chr3:142547750+142547896	147	0.421769
	ATR-5	ACACTGACGACATGGTTCTACATCACTCACCAAGTTTTACTGGACT	TACGGTAGCAGAGACTTGGTCTACGGACATGTGGACCTCTTC	TCACTCACCAAGTTTTACTGGACTaggtattttttttttcagtaggaaaa ggaatggcttgcagacagaagcttttagttgagaagatgaacattcatgt tgagaagtggctttcaagttcctacaGAAGAGGTCCACATGTCCGT	chr3:142555869+142556014	146	0.39726
	ATR-6	ACACTGACGACATGGTTCTACAGTCCACATGTCCGTGTTCAG	TACGGTAGCAGAGACTTGGTCTCCCCAGAGATAAAGTCAAAGATG	GTCCACATGTCCGTGTTCAGagaaaggttctgttaaagaacttgtcagat aaaacatgccgtgaagagtacagacaagttgaccaagtatagaagcaaat tctttcttgacaatgtcagaatCATCTTTGACTTTATCTCTGGGG	chr3:142556001+142556145	145	0.393103
	ATR-7	ACACTGACGACATGGTTCTACAAATTTTCCAATCCTGTCAGGTG	TACGGTAGCAGAGACTTGGTCTGCTGCAAGCTTTGAAAGAGG	AATTTTCCAATCCTGTCAGGTGacatttataggccagaaatataaaaatg gaaattccaaaatacctcacaatatattcatatcctcgttggtaggagCC TCTTTCAAAGCTTGCAGC	chr3:142498532+142498649	118	0.364407
ARID1B	ARID1B-1	CCCACTTAGGTTTTATGGCAGGCACA	TGTGGACCGTAAGTCCCACTTGAGTT	CCCACTTAGGTTTTATGGCAGGCACAcaaagaaaccctcagatggctcag tatggacctcaacagacaggaccatccatgtcgcctcatccttctcctgg gggccagatgcatgctggaatcagtagctttcagcagagtAACTCAAGTG GGACTTACGGTCCACA	chr6:157133019-157133184	166	0.518072
	ARID1B-2	TCACCTTCTTCCCTCTCCCTCTGC	TCTGGCTCATTCCCCAGCTCGT	TCACCTTCTTCCCTCTCCCTCTGCccacccatgccccacctccacatgct gcttctgggtactagaagtccagctcctccaccactactggggagaagat cacgaaggtgtACGAGCTGGGGAATGAGCCAGA	chr6:157180904-157181036	133	0.578947
	ARID1B-3	TCAGCCTCCATGCAGCCCATCA	GGAGACTTGCTTGGAGACATGCGG	TCAGCCTCCATGCAGCCCATCAcacgcccaccacagccgtcctaccagac gccaccgtcactgccaaatcacatctccagggcgcccagcccagcgtcct tccagcgctccctggagaaCCGCATGTCTCCAAGCAAGTCTCC	chr6:157201170-157201312	143	0.636364
	ARID1B-4	ACCTTTCCTCCTGGCTCAGT	AAGATGAGCAGGAACAGCATC	ACCTTTCCTCCTGGCTCAGTagaagcatcacaaccagtcttgaaacaaag gcgaaagattacctccaaagatatcggtaagaattccaaagctttcattc tgaaatgaattccagttgcagtgtagaattttaattttagtaaaGATGCT GTTCCTGCTCATCTT	chr6:157201413-157201577	165	0.381818
	ARID1B-5	GGGGCGTGTGCAGGAGTTCAAT	TGCTCTTTCTTTCTACCTGCGGAGC	GGGGCGTGTGCAGGAGTTCAATagtggccttctgcactggcagctcggcg ggggtgacaccaccgagcacattcagactcactttgagagcaagatggaa attcctcctcgcaggcgcccacctccccccttaaGCTCCGCAGGTAGAAA GAAAGAGCA	chr6:157206559-157206717	159	0.584906
	ARID1B-6	AACCTCATGCACATGCAGCCCC	CCGGCCCTCGTGCAAAAGGAAT	AACCTCATGCACATGCAGCCCCcgcccctggaaccacctagcgtagacat gatgtgcagggcggccaaggctttgctagccatggccagagtggacgaaa accgctcggaATTCCTTTTGCACGAGGGCCGG	chr6:157207673-157207804	132	0.606061
	ARID1B-7	AAGCCAGCCATGTGGTGCTGT	GTTCACAGTTGGCATTGGCGGC	AAGCCAGCCATGTGGTGCTGTgcccctgggacgaatgccatcagctggga tgcagaacagaccatttcctggaaatatgagcagcatgacccccagttct cctggcatgtctcagcagggagggccaggaatgggGCCGCCAATGCCAAC TGTGAAC	chr6:157148733-157148889	157	0.579618
BAP1	BAP1-1	GACCGGCGCTCTTCGATCCAT	CACCTGAGTGATGACGCAGTGCAA	GACCGGCGCTCTTCGATCCATttgaacaggaagataaatccatatacagg gctgggggaagtaaggggcagagccagatcagccaaaggggagaagacaa tcagcattcccttctttctcccattaatcctTTGCACTGCGTCATCACTC AGGTG	chr3:52408556-52408710	155	0.503226
	BAP1-2	GTGGTTGCCCTCAGAGGCTGC	CAGCCAGAGCTGATTCAGACCCAC	GTGGTTGCCCTCAGAGGCTGCaggggccctgtttgcttccagcaccagcg gggacttgttgctggctgacttggactcctcaggcagctgtgactcttga gacttGTGGGTCTGAATCAGCTCTGGCTG	chr3:52405769-52405897	129	0.596899
	BAP1-3	GCAGTCAACACGCAGCAGGC	TCAACTCGCCACTGCGCTCG	GCAGTCAACACGCAGCAGGCtgtcatcctctccaaaaagcaccttggaga tgtgggaggtgacagggctggagggccgcgtcgggttggctgagcggata ggCGAGCGCAGTGGCGAGTTGA	chr3:52403516-52403637	122	0.622951
	BAP1-4	GGAGGGTTGGGCTGGGCAGA	CCTGATGGCAGTGGTGCCCG	GGAGGGTTGGGCTGGGCAGAggccaggaagaaagggcacctacctgctgc agagcctctagtactgtctgacggttcaccttcagcacatgcagcctggc ctcatacttgatcctgcggtCGGGCACCACTGCCATCAGG	chr3:52406210-52406349	140	0.607143
CASP8	CASP8-1	ACACTGACGACATGGTTCTACATCAAATATTGTTTGGGGTTTCC	TACGGTAGCAGAGACTTGGTCTCACATGCAGGTACCAGATAGTAAA	TCAAATATTGTTTGGGGTTTCCccttttaattcagagagaagcagcagcc ttgaaggaagtcctgatgaattttcaaatggtaatgcttggagatacatt ttcaagatttagttaaTTTACTATCTGGTACCTGCATGTG	chr2:201272863+201273002	140	0.364286
	CASP8-2	ACACTGACGACATGGTTCTACATGTTCAAATTTCACTTTTCAGG	TACGGTAGCAGAGACTTGGTCTTCAGTGCCATAGATGATGC	TGTTCAAATTTCACTTTTCAGGggctttgaccacgacctttgaagagctt cattttgagatcaagccccacgatgactgcacagtagagcaaatctatga gattttgaaaatctaccaactcatggaccacagtaacatggactgcttca tctgctgtatcctctcccatggagacaaggGCATCATCTATGGCACTGA	chr2:201284795+201284993	199	0.442211
	CASP8-3	ACACTGACGACATGGTTCTACATCATCTGCTGTATCCTCTCC	TACGGTAGCAGAGACTTGGTCTTCTGAATCAGTCTCAACAGGTA	TCATCTGCTGTATCCTCTCCcatggagacaagggcatcatctatggcact gatggacaggaggcccccatctatgagctgacatctcagttcactggttt gaagtgcccttcccttgctggaaaacccaaagtgttttttattcaggctt gtcagggggataactaccagaaaggtaTACCTGTTGAGACTGATTCAGA	chr2:201284942+201285140	199	0.477387
	CASP8-4	ACACTGACGACATGGTTCTACAGGCTTGTCAGGGGGATAACT	TACGGTAGCAGAGACTTGGTCTTGACTGGATGTACCAGGTTCC	GGCTTGTCAGGGGGATAACTaccagaaaggtatacctgttgagactgatt cagaggagcaaccctatttagaaatggatttatcatcacctcaaacgaga tatatcccggatgaggctgactttctgctggggatggccactgtgaataa ctgtgtttcctaccgaaaccctgcagagGGAACCTGGTACATCCAGTCA	chr2:201285087+201285285	199	0.472362
	CASP8-5	ACACTGACGACATGGTTCTACAGGATGAGGCTGACTTTCTGC	TACGGTAGCAGAGACTTGGTCTGGGGGAAGGTAGTGTAACAG	GGATGAGGCTGACTTTCTGCtggggatggccactgtgaataactgtgttt cctaccgaaaccctgcagagggaacctggtacatccagtcactttgccag agcctgagagagcgatgtcctcggtaagttttgcctactcagccctcctc aCTGTTACACTACCTTCCCCC	chr2:201285195+201285365	171	0.538012
	CASP8-6	ACACTGACGACATGGTTCTACACCCCCACAGACAGTCACAAT	TACGGTAGCAGAGACTTGGTCTAACAAAACAAACAAAATAGCACCA	CCCCCACAGACAGTCACAATattatgtgatgtatttcagaggcgatgata ttctcaccatcctgactgaagtgaactatgaagtaagcaacaaggatgac aagaaaaacatggggaaacagatgcctcagcctactttcacactaagaaa aaaacttgtcttcccttctgattgaTGGTGCTATTTTGTTTGTTTTGTT	chr2:201286420+201286618	199	0.39196
	CASP8-7	ACACTGACGACATGGTTCTACAGGGGAACAACTGGACAGTGA	TACGGTAGCAGAGACTTGGTCTTCCAGTCTATTAATTCGGAAGAGC	GGGGAACAACTGGACAGTGAagatctggcctccctcaagttcctgagcct ggactacattccgcaaaggaagcaagaacccatcaaggatgccttgatgt tattccagagactccaggaaaagagaatgttggaggaaagcaatctgtcc ttcctgaaggagctGCTCTTCCGAATTAATAGACTGGA	chr2:201266517+201266704	188	0.484043
	CASP8-8	ACACTGACGACATGGTTCTACATGTTGGAGGAAAGCAATCTG	TACGGTAGCAGAGACTTGGTCTCAGTCCCACAATGGGAGTTT	TGTTGGAGGAAAGCAATCTGtccttcctgaaggagctgctcttccgaatt aatagactggatttgctgattacctacctaaacactagaaaggaggagat ggaaagggaacttcagacaccaggcagggctcaaatttctgcctacaggt gggtggAAACTCCCATTGTGGGACTG	chr2:201266644+201266819	176	0.477273
	CASP8-9	ACACTGACGACATGGTTCTACAGTGTCTCCATTTCCCACCAC	TACGGTAGCAGAGACTTGGTCTCCCTGGCTAACCAAGTCTCA	GTGTCTCCATTTCCCACCACagggtcatgctctatcagatttcagaagaa gtgagcagatcagaattgaggtcttttaagtttcttttgcaagaggaaat ctccaaatgcaaactggatgatgacatggtaagacctggtatcttactga gatttagtccTGAGACTTGGTTAGCCAGGG	chr2:201271494+201271673	180	0.427778
	CASP8-10	ACACTGACGACATGGTTCTACATCAATCCAGATTCCCAACTTT	TACGGTAGCAGAGACTTGGTCTCCGGCTGTCAGGTTGTTT	TCAATCCAGATTCCCAACTTTatttctcctcctcttagaacctgctggat attttcatagagatggagaagagggtcatcctgggagaaggaaagttgga catcctgaaaagagtctgtgcccaaatcaacaagagcctgctgaagataa tcaacgactatgaagaattcagcaaaggtagAAACAACCTGACAGCCGG	chr2:201272600+201272798	199	0.437186
	CASP8-11	ACACTGACGACATGGTTCTACATGGGTTGGGTTTTTGTTTTC	TACGGTAGCAGAGACTTGGTCTTTTACTTTTCTCTTTTGGGTTCTACTG	TGGGTTGGGTTTTTGTTTTCcagactttggacaaagtttaccaaatgaaa agcaaacctcggggatactgtctgatcatcaacaatcacaattttgcaaa agcacgggagaaagtgcccaaacttcacagcattagggacaggaatggaa cacacttggatgcaggtaCAGTAGAACCCAAAAGAGAAAAGTAAA	chr2:201276804+201276998	195	0.415385
