# Supplementary material for: A Phase Ib Dose-Escalation and Expansion Study of the BCL2 Inhibitor Venetoclax Combined with Tamoxifen in ER and BCL2–Positive Metastatic Breast Cancer
Source: Oxford University Press journal article supplement (doi:10.1158/2159-8290.cd-18-1151), 2019-02-07
Supplement: 21598290cd181151-sup-209709_2_supp_5131347_phbrsm.xlsx [file 21598290cd181151-sup-209709_2_supp_5131347_phbrsm.xlsx]

## Sheet: Sheet1
Gene	Assay Name	Company	Chromosome	Genomic Location	Mutation	Protein change	Forward primer	Reverse primer	Probe 1 (VIC/HEX) WT	Probe 2 (FAM) Mutant
ESR1	ESR1 D538G	BioRad				D538G			dHsaMDS46048530
ESR1	ESR1 S463P	BioRad				S463P			dHsaMDS380997386
ESR1	ESR1 E380Q	BioRad				E380Q			dHsaMDS589632159
ESR1	ESR1 Y537C	BioRad				Y537C	AGGCATGGAGCATCTGTACA	TTGGTCCGTCTCCTCCA	TGGTGCCCCTCTATGACCTG	TGCCCCTCTGTGACCTGCT
ESR1	ESR1 Y537S	BioRad				Y537S	AGGCATGGAGCATCTGTACA	TTGGTCCGTCTCCTCCA	TGGTGCCCCTCTATGACCTG	TGGTGCCCCTCTCTGACCT
ESR1	ESR1 I514V	BioRad				I514V			dHsaMDS881705861
PIK3CA	PIK3CA H1047R	BioRad	3	3: 178952065-178952187	c.3140A>G	p.H1047R			dHsaMDV2010077
PIK3CA	PIK3CA E545K	BioRad	3	3: 178936068-178936190	c.1633G>A	p.E545K			dHsaMDV2010075
PIK3CA	PIK3CA E542K	BioRad	3	3: 178936050-178936172	c.1624G>A	p.E542K			dHsaMDV2010073
PIK3CA	PIK3CA p.449_452d	BioRad	3			p.449_L452del			dHsaMDS973466691
PIK3CA	PIK3CA p.H917R	BioRad	3			p.H917R			dHsaMDS757869449
PIK3CA	PIK3CA p.N345K	BioRad	3			p.N345K			dHsaMDV2516778
PIK3CA	PIK3CA p.Q546R	BioRad	3			p.Q546R			dHsaMDS300538193
