# Supplementary material for: A Phase Ib Dose-Escalation and Expansion Study of the BCL2 Inhibitor Venetoclax Combined with Tamoxifen in ER and BCL2–Positive Metastatic Breast Cancer
Source: Oxford University Press journal article supplement (doi:10.1158/2159-8290.cd-18-1151), 2019-02-07
Supplement: 21598290cd181151-sup-209709_2_supp_5131348_ph5rsm.xlsx [file 21598290cd181151-sup-209709_2_supp_5131348_ph5rsm.xlsx]

## Sheet: Sheet1
Patient ID	Number of mutations detected by targ seq	HGVSg	Gene	Protein Change	Average Depth	Average Read Depth	Average vaf %	Validation by ddPCR	Cosmic
1001	0	-	-	-	-	-	-	-	-
1004	1	chr5:g.67589220A>G	PIK3R1	E403G	15	1392	1.07639	NA
1005	2	chr10:g.8111517dup	GATA3	D335Gfs*17	23.5	710.5	3.31193	NA	COSM41681
1005		chr3:g.178952085A>G	PIK3CA	H1047R	64	730	8.76882	4.35	COSM775
1006	1	chr5:g.56152491C>T	MAP3K1	R183*	17	1092.5	1.64221	NA
1007	2	chr11:g.108124747T>C	ATM	L702P	12	1038.5	1.15734	NA
1007		chr17:g.29670108T>C	NF1	F2361L	20	1717.5	1.17189	NA
1008	3	chr10:g.8105961dup	GATA3	R261Kfs*42	19	662	2.71339	NA
1008		chr16:g.68849539A>G	CDH1	N481S	12	1170	1.02577	NA
1008		chr6:g.152419926A>G	ESR1	D538G	22	1722	1.27758	0.5	COSM94250
1009	2	chr6:g.152415537T>C	ESR1	S463P	25	2201	1.13448	NA
1009		chr6:g.152415690A>G	ESR1	I514V	41	2825	1.45111	NA
1010	6	chr10:g.89711893C>T	PTEN	Q171*	189.5	624	30.5303	14.6	COSM5149
1010		chr1:g.27057835C>G	ARID1A	Q515E	15	1174.5	1.30726	NA
1010		chr3:g.178916946G>C	PIK3CA	K111N	375.5	914	41.5793	NA	COSM12580
1010		chr3:g.178936082G>A	PIK3CA	E542K	34.5	1959	1.7002	0.15	COSM760
1010		chr3:g.178936091G>C	PIK3CA	E545Q	370	1349	27.1105	NA	COSM27133
1010		chr3:g.178938934G>A	PIK3CA	E726K	10.5	258.5	4.06383	NA	COSM87306
1011	1	chr6:g.152419926A>G	ESR1	D538G	431.5	1588	27.1732	20.8	COSM94250
1011		chr6:g.152419923A>G	ESR1	Y537C	*	*	*	0.82	COSM1074637
1012	0	-	-	-	-	-	-	-	-
1013	1	chr3:g.178952085A>G	PIK3CA	H1047R	14	876	1.59817	1.91	COSM775
1014	4	chr16:g.68847245_68847248del	CDH1	N390Sfs*2	146	1077	13.5419	NA
1014		chr3:g.178952085A>G	PIK3CA	H1047R	42	1297.5	3.23295	2.1	COSM775
1014		chr6:g.152332832G>C	ESR1	E380Q	132	1328.5	9.94641	6.8	COSM3829320
1014		chr6:g.152419923A>G	ESR1	Y537C	100	1248.5	7.97692	8.3	COSM1074637
1015	0	-	-	-	-	-	-	-	-
1016	2	chr10:g.8111489dup	GATA3	T326Hfs*26	62	630.5	9.84943	NA
1016		chr10:g.89653846C>A	PTEN	N48K	22.5	331.5	6.79514	NA
1017	3	chr3:g.178936046C>A	PIK3CA	Q530K	38.5	1425	2.70233	NA
1017		chr3:g.178952085A>G	PIK3CA	H1047R	11	474.5	2.30537	2.9	COSM775
1017		chr5:g.56161667del	MAP3K1	L388Ffs*48	18	505.5	3.5714	NA
1018	0	-	-	-	-	-	-	-	-
1019	2	chr12:g.46245909G>A	ARID2	A1335T	37	890	4.1246	NA
1019		chr3:g.178947875A>G	PIK3CA	H917R	15	1251.5	1.19856	NA
1020	1	chr6:g.152332832G>C	ESR1	E380Q	161	1178.5	13.6845	10.2	COSM3829320
1021	5	chr10:g.8111433_8111434del	GATA3	splice_acceptor_variant;intron_variant	83	604.5	14.1507	NA	COSM41683
1021		chr16:g.67070564A>G	CBFB	N63S	142	616.5	23.1887	NA	COSM1478965
1021		chr21:g.36171600G>T	RUNX1	S322*	85.5	306	27.5351	NA
1021		chr3:g.178917478G>A	PIK3CA	G118D	61.5	214.5	29.5235	NA	COSM751
1021		chr3:g.178952085A>G	PIK3CA	H1047R	155.5	511	30.2386	30.4	COSM775
1022	1	chr5:g.112174485A>G	APC	Q1065R	20.5	1078.5	1.89733	NA
1023	1	chr3:g.178936091G>A	PIK3CA	E545K	169.25	660	25.3174	19.8	COSM763
1024	3	chr10:g.8111544T>C	GATA3	Y344H	20.8	435.6	5.9255	NA
1024		chr10:g.89720721A>G	PTEN	E291G	10.5	626.5	1.6971	NA	COSM1349603
1024		chr6:g.152419926A>G	ESR1	D538G	22.5	620	3.24609	1.7	COSM94250
1025	1	chr17:g.7578213_7578214del	TP53	F212Sfs*3	515.5	764.333	66.7411	NA	COSM44162
1026	3	chr16:g.68857418G>A	CDH1	V685M	19	686	2.85794	NA	COSM1379190
1026		chr2:g.202131394T>C	CASP8	L62P	17.5	535	3.22128	NA	COSM209547
1026		chr5:g.56183304T>C	MAP3K1	F1405S	13	696.5	1.86779	NA
1027	4	chr17:g.11984784_11984789del	MAP2K4	G111_A112del	69.1667	521.667	14.4426	NA
1027		chr3:g.178921553T>A	PIK3CA	N345K	49	483	9.84057	19.8	COSM754
1027		chr6:g.152419923A>G	ESR1	Y537C	14	712	1.96629	0.7	COSM1074637
1027		chr6:g.152419926A>G	ESR1	D538G	49	475.333	10.3222	9.4	COSM94250
1028	1	chr3:g.47058689A>G	SETD2	L2530P	13.5	1254	1.07394	NA
1029	1	chr3:g.178928067_178928078del	PIK3CA	P449_L452del	46.3333	305.667	17.2444	2.26
1030	1	chr6:g.152419926A>G	ESR1	D538G	49.8333	353.333	14.1454	13.1	COSM94250
1031	3	chr16:g.68853200A>G	CDH1	D528G	13	1182	1.09841	NA
1031		chr12:g.12871842A>G	CDKN1B	T187A	13	1058	1.23634	NA
1031		chr3:g.178952009A>G	PIK3CA	I1022V	40.5	869	4.65651	NA
1032	4	chr1:g.27057928C>G	ARID1A	Q546E	17	417.5	5.30342	NA
1032		chr5:g.56189470A>G	MAP3K1	E1501G	11	988	1.11381	NA
1032		chr3:g.178936091G>A	PIK3CA	E545K	52	1221.75	4.20977	2.5	COSM125370
1032		chr17:g.7579719A>T	TP53	L26H	16.5	755.5	2.18053	NA
1033	0
2001	3	chr16:g.67100627A>G	CBFB	I109V	26.5	2164.5	1.20572	NA
2001		chr3:g.178952085A>T	PIK3CA	H1047L	63.5	807.25	7.99683	12.3	COSM776
2001		chr6:g.152419923A>C	ESR1	Y537S	62.3333	1091.67	7.60834	5.3	COSM1074639
2002	3	chr3:g.178936082G>A	PIK3CA	E542K	40.8333	731.333	5.27002	5.1	COSM760
2002		chr3:g.178948038T>C	PIK3CA	F937S	12.5	790	1.58264	NA
2002		chr6:g.152332832G>C	ESR1	E380Q	115.333	1651	6.18262	4.5	COSM3829320
	28 mutants
*Mutation detected by targeted sequencing but below limit of detection (0.3 VAF). Mutation was subsequently validated by ddPCR.

## Sheet: Sheet2
Old Gene	# patients		New sheet		addition
PIK3CA	12		PIK3CA	14	2
ESR1	10		ESR1	10
GATA3	5		GATA3	5
MAP3K1	3		CDH1	4	1
CDH1	3		MAP3K1	4	1
PTEN	3		PTEN	3
CBFB	2		ARID1A	2	1
TP53	1		CBFB	2
APC	1		TP53	2	1
ARID2	1		APC	1
ATM	1		ARID2	1
MAP2K4	1		ATM	1
NF1	1		CASP8	1
PIK3R1	1		CDKN1B	1	1	new
RUNX1	1		MAP2K4	1
SETD2	1		NF1	1
CASP8	1		PIK3R1	1
ARID1A	1		RUNX1	1
			SETD2	1
